# Supplementary material for: Evaluation of traditional and bootstrapped methods for assessing data-poor fisheries: a case study on tropical seabob shrimp (Xiphopenaeus kroyeri) with an improved length-based mortality estimation method
Source: PeerJ. 2024 Nov 14;12:e18397. doi: 10.7717/peerj.18397 (PMC11569787; doi:10.7717/peerj.18397)
Supplement: Supplemental Information 1 — Individual shrimp measurements for the four studied fishing grounds [file peerj-12-18397-s001.xlsx]

## Sheet: peerj-81543-raw_data
Region	Area	Point	Trawl	Month	Sample.date	Year	Trawl.area	ID	Sp	Sp.code	TL.mm	CL.mm	Sex	Weight.g
CV	Externa	3	1	1	01.01.2019	2019	1655.38	XIPKRO-01CA03A1-29I19	Xiphopenaeus kroyeri	Xipkro	106	51	F	5.29
CV	Externa	3	1	1	01.01.2019	2019	1655.38	XIPKRO-02CA03A1-29I19	Xiphopenaeus kroyeri	Xipkro	81	30	M	2.67
CV	Externa	3	1	1	01.01.2019	2019	1655.38	XIPKRO-03CA03A1-29I19	Xiphopenaeus kroyeri	Xipkro	68	29	M	1.47
CV	Externa	3	1	1	01.01.2019	2019	1655.38	XIPKRO-04CA03A1-29I19	Xiphopenaeus kroyeri	Xipkro	79	32	M	2.42
CV	Externa	3	1	1	01.01.2019	2019	1655.38	XIPKRO-05CA03A1-29I19	Xiphopenaeus kroyeri	Xipkro	61	27	F	1.3
CV	Externa	3	1	1	01.01.2019	2019	1655.38	XIPKRO-06CA03A1-29I19	Xiphopenaeus kroyeri	Xipkro	49	22	F	0.63
CV	Externa	3	1	1	01.01.2019	2019	1655.38	XIPKRO-07CA03A1-29I19	Xiphopenaeus kroyeri	Xipkro	34	13	F	0.21
CV	Externa	3	1	1	01.01.2019	2019	1655.38	XIPKRO-08CA03A1-29I19	Xiphopenaeus kroyeri	Xipkro	36	16	F	0.23
CV	Externa	3	1	1	01.01.2019	2019	1655.38	XIPKRO-09CA03A1-29I19	Xiphopenaeus kroyeri	Xipkro	41	18	F	0.37
CV	Externa	3	1	1	01.01.2019	2019	1655.38	XIPKRO-10CA03A1-29I19	Xiphopenaeus kroyeri	Xipkro	33	12	F	0.22
CV	Externa	3	1	1	01.01.2019	2019	1655.38	XIPKRO-11CA03A1-29I19	Xiphopenaeus kroyeri	Xipkro	30	11	F	0.13
CV	Externa	3	1	1	01.01.2019	2019	1655.38	XIPKRO-12CA03A1-29I19	Xiphopenaeus kroyeri	Xipkro	30	11	F	0.12
CV	Externa	3	1	1	01.01.2019	2019	1655.38	XIPKRO-13CA03A1-29I19	Xiphopenaeus kroyeri	Xipkro	25	10	F	0.09
CV	Externa	3	1	1	01.01.2019	2019	1655.38	XIPKRO-14CA03A1-29I19	Xiphopenaeus kroyeri	Xipkro	24	9	F	0.07
CV	Externa	3	3	1	01.01.2019	2019	1634.88	XIPKRO-01CA03A3-29I19	Xiphopenaeus kroyeri	Xipkro	81	38	F	2.55
IP	Externa	3	1	1	01.01.2019	2019	1696.38	XIPKRO-01IP03A1-25I19	Xiphopenaeus kroyeri	Xipkro	100	22	F	6.23
RD	Externa	3	1	1	01.01.2019	2019	686.75	XIPKRO-01RD03A1-25I19	Xiphopenaeus kroyeri	Xipkro	94	18	F	5.2
RD	Externa	3	1	1	01.01.2019	2019	686.75	XIPKRO-02RD03A1-25I19	Xiphopenaeus kroyeri	Xipkro	88	21	F	5.98
RD	Externa	3	1	1	01.01.2019	2019	686.75	XIPKRO-03RD03A1-25I19	Xiphopenaeus kroyeri	Xipkro	96	18	F	5.03
RD	Externa	3	1	1	01.01.2019	2019	686.75	XIPKRO-04RD03A1-25I19	Xiphopenaeus kroyeri	Xipkro	85	16	M	4.15
RD	Externa	3	1	1	01.01.2019	2019	686.75	XIPKRO-05RD03A1-25I19	Xiphopenaeus kroyeri	Xipkro	103	23	F	4.85
RD	Externa	3	1	1	01.01.2019	2019	686.75	XIPKRO-06RD03A1-25I19	Xiphopenaeus kroyeri	Xipkro	82	18	F	7.2
RD	Externa	3	1	1	01.01.2019	2019	686.75	XIPKRO-07RD03A1-25I19	Xiphopenaeus kroyeri	Xipkro	92	22	F	3.35
RD	Externa	3	1	1	01.01.2019	2019	686.75	XIPKRO-08RD03A1-25I19	Xiphopenaeus kroyeri	Xipkro	75	15	M	4.06
RD	Externa	3	1	1	01.01.2019	2019	686.75	XIPKRO-09RD03A1-25I19	Xiphopenaeus kroyeri	Xipkro	72	19	F	5.82
RD	Externa	3	1	1	01.01.2019	2019	686.75	XIPKRO-10RD03A1-25I19	Xiphopenaeus kroyeri	Xipkro	67	14	F	2.62
RD	Externa	3	1	1	01.01.2019	2019	686.75	XIPKRO-11RD03A1-25I19	Xiphopenaeus kroyeri	Xipkro	91	19	M	2.42
RD	Externa	3	1	1	01.01.2019	2019	686.75	XIPKRO-12RD03A1-25I19	Xiphopenaeus kroyeri	Xipkro	81	16	M	2
RD	Externa	3	1	1	01.01.2019	2019	686.75	XIPKRO-13RD03A1-25I19	Xiphopenaeus kroyeri	Xipkro	84	17	F	3.73
RD	Externa	3	1	1	01.01.2019	2019	686.75	XIPKRO-14RD03A1-25I19	Xiphopenaeus kroyeri	Xipkro	81	16	M	3.04
RD	Externa	3	1	1	01.01.2019	2019	686.75	XIPKRO-15RD03A1-25I19	Xiphopenaeus kroyeri	Xipkro	60	12	F	1.16
RD	Externa	3	1	1	01.01.2019	2019	686.75	XIPKRO-16RD03A1-25I19	Xiphopenaeus kroyeri	Xipkro	67	13	M	1.54
RD	Externa	3	1	1	01.01.2019	2019	686.75	XIPKRO-17RD03A1-25I19	Xiphopenaeus kroyeri	Xipkro	91	20	M	4.37
RD	Externa	3	1	1	01.01.2019	2019	686.75	XIPKRO-18RD03A1-25I19	Xiphopenaeus kroyeri	Xipkro	70	15	M	2.39
RD	Externa	3	1	1	01.01.2019	2019	686.75	XIPKRO-19RD03A1-25I19	Xiphopenaeus kroyeri	Xipkro	86	18	M	4.5
RD	Externa	3	1	1	01.01.2019	2019	686.75	XIPKRO-20RD03A1-25I19	Xiphopenaeus kroyeri	Xipkro	73	17	F	3.64
RD	Externa	3	1	1	01.01.2019	2019	686.75	XIPKRO-21RD03A1-25I19	Xiphopenaeus kroyeri	Xipkro	69	16	M	2.28
RD	Externa	3	1	1	01.01.2019	2019	686.75	XIPKRO-22RD03A1-25I19	Xiphopenaeus kroyeri	Xipkro	83	17	M	3.69
RD	Externa	3	1	1	01.01.2019	2019	686.75	XIPKRO-23RD03A1-25I19	Xiphopenaeus kroyeri	Xipkro	100	19	F	4.95
RD	Externa	3	1	1	01.01.2019	2019	686.75	XIPKRO-24RD03A1-25I19	Xiphopenaeus kroyeri	Xipkro	81	17	M	3.31
RD	Externa	3	1	1	01.01.2019	2019	686.75	XIPKRO-25RD03A1-25I19	Xiphopenaeus kroyeri	Xipkro	93	18	M	3.83
RD	Externa	3	1	1	01.01.2019	2019	686.75	XIPKRO-26RD03A1-25I19	Xiphopenaeus kroyeri	Xipkro	98	18	F	5.01
RD	Externa	3	1	1	01.01.2019	2019	686.75	XIPKRO-27RD03A1-25I19	Xiphopenaeus kroyeri	Xipkro	95	20	F	5.13
RD	Externa	3	1	1	01.01.2019	2019	686.75	XIPKRO-28RD03A1-25I19	Xiphopenaeus kroyeri	Xipkro	86	17	M	3.34
RD	Externa	3	1	1	01.01.2019	2019	686.75	XIPKRO-29RD03A1-25I19	Xiphopenaeus kroyeri	Xipkro	77	17	M	4.03
RD	Externa	3	1	1	01.01.2019	2019	686.75	XIPKRO-30RD03A1-25I19	Xiphopenaeus kroyeri	Xipkro	63	12	F	1.24
RD	Externa	3	1	1	01.01.2019	2019	686.75		Xiphopenaeus kroyeri	Xipkro				115.96
RD	Externa	3	2	1	01.01.2019	2019	1035.25	XIPKRO-01RD03A2-25I19	Xiphopenaeus kroyeri	Xipkro	90	21	M	4.35
RD	Externa	3	2	1	01.01.2019	2019	1035.25	XIPKRO-02RD03A2-25I19	Xiphopenaeus kroyeri	Xipkro	80	19	F	3.2
RD	Externa	3	2	1	01.01.2019	2019	1035.25	XIPKRO-03RD03A2-25I19	Xiphopenaeus kroyeri	Xipkro	84	21	M	2.8
RD	Externa	3	2	1	01.01.2019	2019	1035.25	XIPKRO-04RD03A2-25I19	Xiphopenaeus kroyeri	Xipkro	66	15	F	1.46
RD	Externa	3	2	1	01.01.2019	2019	1035.25	XIPKRO-05RD03A2-25I19	Xiphopenaeus kroyeri	Xipkro	77	17	M	2.25
RD	Externa	3	2	1	01.01.2019	2019	1035.25	XIPKRO-06RD03A2-25I19	Xiphopenaeus kroyeri	Xipkro	54	10	F	1.9
RD	Externa	3	2	1	01.01.2019	2019	1035.25	XIPKRO-07RD03A2-25I19	Xiphopenaeus kroyeri	Xipkro	58	12	F	1.12
RD	Externa	3	2	1	01.01.2019	2019	1035.25	XIPKRO-08RD03A2-25I19	Xiphopenaeus kroyeri	Xipkro	49	9	F	0.76
RD	Externa	3	2	1	01.01.2019	2019	1035.25	XIPKRO-09RD03A2-25I19	Xiphopenaeus kroyeri	Xipkro	77	19	M	2.41
RD	Externa	3	2	1	01.01.2019	2019	1035.25	XIPKRO-10RD03A2-25I19	Xiphopenaeus kroyeri	Xipkro	64	12	F	2.56
RD	Externa	3	2	1	01.01.2019	2019	1035.25	XIPKRO-11RD03A2-25I19	Xiphopenaeus kroyeri	Xipkro	100	24	F	5.44
RD	Externa	3	2	1	01.01.2019	2019	1035.25	XIPKRO-12RD03A2-25I19	Xiphopenaeus kroyeri	Xipkro	88	20	M	4.56
RD	Externa	3	2	1	01.01.2019	2019	1035.25	XIPKRO-13RD03A2-25I19	Xiphopenaeus kroyeri	Xipkro	76	17	M	3.86
RD	Externa	3	2	1	01.01.2019	2019	1035.25	XIPKRO-14RD03A2-25I19	Xiphopenaeus kroyeri	Xipkro	76	22	M	4.17
RD	Externa	3	2	1	01.01.2019	2019	1035.25	XIPKRO-15RD03A2-25I19	Xiphopenaeus kroyeri	Xipkro	56	11	F	1.18
RD	Externa	3	2	1	01.01.2019	2019	1035.25	XIPKRO-16RD03A2-25I19	Xiphopenaeus kroyeri	Xipkro	72	14	M	2.35
RD	Externa	3	2	1	01.01.2019	2019	1035.25	XIPKRO-17RD03A2-25I19	Xiphopenaeus kroyeri	Xipkro	58	16	M	1.62
RD	Externa	3	2	1	01.01.2019	2019	1035.25	XIPKRO-18RD03A2-25I19	Xiphopenaeus kroyeri	Xipkro	75	16	F	3.44
RD	Externa	3	2	1	01.01.2019	2019	1035.25	XIPKRO-19RD03A2-25I19	Xiphopenaeus kroyeri	Xipkro	71	17	F	2.07
RD	Externa	3	2	1	01.01.2019	2019	1035.25	XIPKRO-20RD03A2-25I19	Xiphopenaeus kroyeri	Xipkro	95	24	F	6.03
RD	Externa	3	2	1	01.01.2019	2019	1035.25	XIPKRO-21RD03A2-25I19	Xiphopenaeus kroyeri	Xipkro	79	18	M	3
RD	Externa	3	2	1	01.01.2019	2019	1035.25	XIPKRO-22RD03A2-25I19	Xiphopenaeus kroyeri	Xipkro	69	15	M	4.1
RD	Externa	3	2	1	01.01.2019	2019	1035.25	XIPKRO-23RD03A2-25I19	Xiphopenaeus kroyeri	Xipkro	92	22	F	2.14
RD	Externa	3	2	1	01.01.2019	2019	1035.25	XIPKRO-24RD03A2-25I19	Xiphopenaeus kroyeri	Xipkro	69	13	M	5.66
RD	Externa	3	2	1	01.01.2019	2019	1035.25	XIPKRO-25RD03A2-25I19	Xiphopenaeus kroyeri	Xipkro	65	15	F	2.01
RD	Externa	3	2	1	01.01.2019	2019	1035.25	XIPKRO-26RD03A2-25I19	Xiphopenaeus kroyeri	Xipkro	80	14	F	3.53
RD	Externa	3	2	1	01.01.2019	2019	1035.25	XIPKRO-27RD03A2-25I19	Xiphopenaeus kroyeri	Xipkro	58	13	F	1.39
RD	Externa	3	2	1	01.01.2019	2019	1035.25	XIPKRO-28RD03A2-25I19	Xiphopenaeus kroyeri	Xipkro	70	15	F	2.68
RD	Externa	3	2	1	01.01.2019	2019	1035.25		Xiphopenaeus kroyeri	Xipkro				383.167
RD	Externa	3	2	1	01.01.2019	2019	1035.25	XIPKRO-01RD03A2-25I19	Xiphopenaeus kroyeri	Xipkro	58	10	M	0.79
RD	Externa	3	2	1	01.01.2019	2019	1035.25	XIPKRO-02RD03A2-25I19	Xiphopenaeus kroyeri	Xipkro	61	12	M	1.17
RD	Externa	3	2	1	01.01.2019	2019	1035.25	XIPKRO-03RD03A2-25I19	Xiphopenaeus kroyeri	Xipkro	22	5	F	0.09
RD	Externa	3	2	1	01.01.2019	2019	1035.25	XIPKRO-04RD03A2-25I19	Xiphopenaeus kroyeri	Xipkro	25	7	F	0.07
RD	Externa	3	3	1	01.01.2019	2019	881.5	XIPKRO-01RD03A3-25I19	Xiphopenaeus kroyeri	Xipkro	95	31	F	5.75
RD	Externa	3	3	1	01.01.2019	2019	881.5	XIPKRO-02RD03A3-25I19	Xiphopenaeus kroyeri	Xipkro	86	30	F	4.24
RD	Externa	3	3	1	01.01.2019	2019	881.5	XIPKRO-03RD03A3-25I19	Xiphopenaeus kroyeri	Xipkro	55	24	M	1.53
RD	Externa	3	3	1	01.01.2019	2019	881.5	XIPKRO-04RD03A3-25I19	Xiphopenaeus kroyeri	Xipkro	62	17	F	2.59
RD	Externa	3	3	1	01.01.2019	2019	881.5	XIPKRO-05RD03A3-25I19	Xiphopenaeus kroyeri	Xipkro	64	13	M	1.74
RD	Externa	3	3	1	01.01.2019	2019	881.5	XIPKRO-06RD03A3-25I19	Xiphopenaeus kroyeri	Xipkro	51	9	F	0.73
RD	Externa	3	3	1	01.01.2019	2019	881.5	XIPKRO-07RD03A3-25I19	Xiphopenaeus kroyeri	Xipkro	57	12	F	0.93
RD	Externa	3	3	1	01.01.2019	2019	881.5	XIPKRO-08RD03A3-25I19	Xiphopenaeus kroyeri	Xipkro	67	13	F	1.48
RD	Externa	3	3	1	01.01.2019	2019	881.5	XIPKRO-09RD03A3-25I19	Xiphopenaeus kroyeri	Xipkro	116	28	F	12.04
RD	Externa	3	3	1	01.01.2019	2019	881.5	XIPKRO-10RD03A3-25I19	Xiphopenaeus kroyeri	Xipkro	101	21	M	5.39
RD	Externa	3	3	1	01.01.2019	2019	881.5	XIPKRO-11RD03A3-25I19	Xiphopenaeus kroyeri	Xipkro	80	16	M	2.71
RD	Externa	3	3	1	01.01.2019	2019	881.5	XIPKRO-12RD03A3-25I19	Xiphopenaeus kroyeri	Xipkro	69	13	M	1.74
RD	Externa	3	3	1	01.01.2019	2019	881.5	XIPKRO-13RD03A3-25I19	Xiphopenaeus kroyeri	Xipkro	76	16	M	2.28
RD	Externa	3	3	1	01.01.2019	2019	881.5	XIPKRO-14RD03A3-25I19	Xiphopenaeus kroyeri	Xipkro	82	17	F	2.79
RD	Externa	3	3	1	01.01.2019	2019	881.5	XIPKRO-15RD03A3-25I19	Xiphopenaeus kroyeri	Xipkro	75	15	F	2.08
RD	Externa	3	3	1	01.01.2019	2019	881.5	XIPKRO-16RD03A3-25I19	Xiphopenaeus kroyeri	Xipkro	72	14	F	1.82
RD	Externa	3	3	1	01.01.2019	2019	881.5	XIPKRO-17RD03A3-25I19	Xiphopenaeus kroyeri	Xipkro	44	10	F	0.76
RD	Externa	3	3	1	01.01.2019	2019	881.5	XIPKRO-18RD03A3-25I19	Xiphopenaeus kroyeri	Xipkro	78	14	F	2.14
RD	Externa	3	3	1	01.01.2019	2019	881.5	XIPKRO-19RD03A3-25I19	Xiphopenaeus kroyeri	Xipkro	89	17	M	3.46
RD	Externa	3	3	1	01.01.2019	2019	881.5	XIPKRO-20RD03A3-25I19	Xiphopenaeus kroyeri	Xipkro	63	12	M	1.36
RD	Externa	3	3	1	01.01.2019	2019	881.5	XIPKRO-21RD03A3-25I19	Xiphopenaeus kroyeri	Xipkro	84	16	M	3.96
RD	Externa	3	3	1	01.01.2019	2019	881.5	XIPKRO-22RD03A3-25I19	Xiphopenaeus kroyeri	Xipkro	101	21	F	5.9
RD	Externa	3	3	1	01.01.2019	2019	881.5	XIPKRO-23RD03A3-25I19	Xiphopenaeus kroyeri	Xipkro	105	21	F	6.32
RD	Externa	3	3	1	01.01.2019	2019	881.5	XIPKRO-24RD03A3-25I19	Xiphopenaeus kroyeri	Xipkro	84	18	F	3.53
RD	Externa	3	3	1	01.01.2019	2019	881.5	XIPKRO-25RD03A3-25I19	Xiphopenaeus kroyeri	Xipkro	100	20	F	5.54
RD	Externa	3	3	1	01.01.2019	2019	881.5	XIPKRO-26RD03A3-25I19	Xiphopenaeus kroyeri	Xipkro	59	10	F	1.01
RD	Externa	3	3	1	01.01.2019	2019	881.5	XIPKRO-27RD03A3-25I19	Xiphopenaeus kroyeri	Xipkro	71	13	M	1.78
RD	Externa	3	3	1	01.01.2019	2019	881.5	XIPKRO-28RD03A3-25I19	Xiphopenaeus kroyeri	Xipkro	85	15	M	4.26
RD	Externa	3	3	1	01.01.2019	2019	881.5	XIPKRO-29RD03A3-25I19	Xiphopenaeus kroyeri	Xipkro	75	17	M	3.82
RD	Externa	3	3	1	01.01.2019	2019	881.5	XIPKRO-30RD03A3-25I19	Xiphopenaeus kroyeri	Xipkro	70	12	M	2.05
RD	Externa	3	3	1	01.01.2019	2019	881.5	XIPKRO-31RD03A3-25I19	Xiphopenaeus kroyeri	Xipkro	74	14	M	2.06
RD	Externa	3	3	1	01.01.2019	2019	881.5		Xiphopenaeus kroyeri	Xipkro				355.762
SM	Externa	3	1	1	01.01.2019	2019	594.5	XIPKRO-01SM03A1-27I19	Xiphopenaeus kroyeri	Xipkro	44	10	F	0.59
SM	Externa	3	1	1	01.01.2019	2019	594.5	XIPKRO-02SM03A1-27I19	Xiphopenaeus kroyeri	Xipkro	37	12	F	1.34
SM	Externa	3	1	1	01.01.2019	2019	594.5	XIPKRO-03SM03A1-27I19	Xiphopenaeus kroyeri	Xipkro	54	10	M	0.98
SM	Externa	3	1	1	01.01.2019	2019	594.5	XIPKRO-04SM03A1-27I19	Xiphopenaeus kroyeri	Xipkro	78	18	F	3.95
SM	Externa	3	1	1	01.01.2019	2019	594.5	XIPKRO-05SM03A1-27I19	Xiphopenaeus kroyeri	Xipkro	68	15	F	1.94
SM	Externa	3	1	1	01.01.2019	2019	594.5	XIPKRO-06SM03A1-27I19	Xiphopenaeus kroyeri	Xipkro	58	11	F	1.02
SM	Externa	3	1	1	01.01.2019	2019	594.5	XIPKRO-07SM03A1-27I19	Xiphopenaeus kroyeri	Xipkro	62	14	F	2.02
SM	Externa	3	1	1	01.01.2019	2019	594.5	XIPKRO-08SM03A1-27I19	Xiphopenaeus kroyeri	Xipkro	55	11	F	0.86
SM	Externa	3	1	1	01.01.2019	2019	594.5	XIPKRO-09SM03A1-27I19	Xiphopenaeus kroyeri	Xipkro	53	11	F	0.87
SM	Externa	3	1	1	01.01.2019	2019	594.5	XIPKRO-10SM03A1-27I19	Xiphopenaeus kroyeri	Xipkro	98	20	F	5.81
SM	Externa	3	1	1	01.01.2019	2019	594.5	XIPKRO-11SM03A1-27I19	Xiphopenaeus kroyeri	Xipkro	40	10	F	0.6
SM	Externa	3	1	1	01.01.2019	2019	594.5	XIPKRO-12SM03A1-27I19	Xiphopenaeus kroyeri	Xipkro	71	17	M	2.22
SM	Externa	3	1	1	01.01.2019	2019	594.5	XIPKRO-13SM03A1-27I19	Xiphopenaeus kroyeri	Xipkro	50	10	M	0.85
SM	Externa	3	1	1	01.01.2019	2019	594.5	XIPKRO-14SM03A1-27I19	Xiphopenaeus kroyeri	Xipkro	58	12	M	1.28
SM	Externa	3	1	1	01.01.2019	2019	594.5	XIPKRO-15SM03A1-27I19	Xiphopenaeus kroyeri	Xipkro	71	15	M	2.37
SM	Externa	3	1	1	01.01.2019	2019	594.5	XIPKRO-16SM03A1-27I19	Xiphopenaeus kroyeri	Xipkro	60	12	M	1.34
SM	Externa	3	1	1	01.01.2019	2019	594.5	XIPKRO-17SM03A1-27I19	Xiphopenaeus kroyeri	Xipkro	78	15	F	2.8
SM	Externa	3	1	1	01.01.2019	2019	594.5	XIPKRO-18SM03A1-27I19	Xiphopenaeus kroyeri	Xipkro	47	10	F	0.83
SM	Externa	3	1	1	01.01.2019	2019	594.5	XIPKRO-19SM03A1-27I19	Xiphopenaeus kroyeri	Xipkro	58	13	F	1.2
SM	Externa	3	1	1	01.01.2019	2019	594.5	XIPKRO-20SM03A1-27I19	Xiphopenaeus kroyeri	Xipkro	68	14	F	2.02
SM	Externa	3	1	1	01.01.2019	2019	594.5	XIPKRO-21SM03A1-27I19	Xiphopenaeus kroyeri	Xipkro	78	12	M	0.85
SM	Externa	3	1	1	01.01.2019	2019	594.5	XIPKRO-22SM03A1-27I19	Xiphopenaeus kroyeri	Xipkro	52	12	F	0.9
SM	Externa	3	1	1	01.01.2019	2019	594.5	XIPKRO-23SM03A1-27I19	Xiphopenaeus kroyeri	Xipkro	28	8	F	0.22
SM	Externa	3	1	1	01.01.2019	2019	594.5	XIPKRO-24SM03A1-27I19	Xiphopenaeus kroyeri	Xipkro	45	10	F	0.62
SM	Externa	3	1	1	01.01.2019	2019	594.5	XIPKRO-25SM03A1-27I19	Xiphopenaeus kroyeri	Xipkro	72	12	F	2.49
SM	Externa	3	1	1	01.01.2019	2019	594.5	XIPKRO-26SM03A1-27I19	Xiphopenaeus kroyeri	Xipkro	64	13	F	1.93
SM	Externa	3	1	1	01.01.2019	2019	594.5	XIPKRO-27SM03A1-27I19	Xiphopenaeus kroyeri	Xipkro	69	13	M	1.85
SM	Externa	3	1	1	01.01.2019	2019	594.5	XIPKRO-28SM03A1-27I19	Xiphopenaeus kroyeri	Xipkro	84	18	F	3.39
SM	Externa	3	1	1	01.01.2019	2019	594.5	XIPKRO-29SM03A1-27I19	Xiphopenaeus kroyeri	Xipkro	68	14	F	2.12
SM	Externa	3	1	1	01.01.2019	2019	594.5	XIPKRO-30SM03A1-27I19	Xiphopenaeus kroyeri	Xipkro	37	10	F	0.45
SM	Externa	3	1	1	01.01.2019	2019	594.5		Xiphopenaeus kroyeri	Xipkro				423.13
CV	Externa	3	1	2	01.02.2019	2019	1148	XIPKRO-01CA03A1-17II19	Xiphopenaeus kroyeri	Xipkro	67	15	F	2.36
CV	Externa	3	1	2	01.02.2019	2019	1148	XIPKRO-02CA03A1-17II19	Xiphopenaeus kroyeri	Xipkro	89	22	F	5.48
CV	Externa	3	1	2	01.02.2019	2019	1148	XIPKRO-03CA03A1-17II19	Xiphopenaeus kroyeri	Xipkro	51	13	F	0.68
CV	Externa	3	1	2	01.02.2019	2019	1148	XIPKRO-04CA03A1-17II19	Xiphopenaeus kroyeri	Xipkro	74	18	M	3.13
CV	Externa	3	1	2	01.02.2019	2019	1148	XIPKRO-05CA03A1-17II19	Xiphopenaeus kroyeri	Xipkro	59	13	M	1.34
CV	Externa	3	1	2	01.02.2019	2019	1148	XIPKRO-06CA03A1-17II19	Xiphopenaeus kroyeri	Xipkro	72	18	F	3.56
CV	Externa	3	1	2	01.02.2019	2019	1148	XIPKRO-07CA03A1-17II19	Xiphopenaeus kroyeri	Xipkro	69	18	F	2.36
CV	Externa	3	1	2	01.02.2019	2019	1148	XIPKRO-08CA03A1-17II19	Xiphopenaeus kroyeri	Xipkro	64	18	M	1.59
CV	Externa	3	1	2	01.02.2019	2019	1148	XIPKRO-09CA03A1-17II19	Xiphopenaeus kroyeri	Xipkro	62	18	M	1.23
CV	Externa	3	1	2	01.02.2019	2019	1148	XIPKRO-10CA03A1-17II19	Xiphopenaeus kroyeri	Xipkro	52	13	M	0.86
CV	Externa	3	1	2	01.02.2019	2019	1148	XIPKRO-11CA03A1-17II19	Xiphopenaeus kroyeri	Xipkro	89	19	F	4.38
CV	Externa	3	1	2	01.02.2019	2019	1148	XIPKRO-12CA03A1-17II19	Xiphopenaeus kroyeri	Xipkro	75	14	M	2.76
CV	Externa	3	1	2	01.02.2019	2019	1148	XIPKRO-13CA03A1-17II19	Xiphopenaeus kroyeri	Xipkro	58	14	F	1.18
CV	Externa	3	1	2	01.02.2019	2019	1148	XIPKRO-14CA03A1-17II19	Xiphopenaeus kroyeri	Xipkro	65	15	F	1.58
CV	Externa	3	1	2	01.02.2019	2019	1148	XIPKRO-15CA03A1-17II19	Xiphopenaeus kroyeri	Xipkro	55	10	M	1.09
CV	Externa	3	1	2	01.02.2019	2019	1148	XIPKRO-16CA03A1-17II19	Xiphopenaeus kroyeri	Xipkro	72	17	F	2.48
CV	Externa	3	1	2	01.02.2019	2019	1148	XIPKRO-17CA03A1-17II19	Xiphopenaeus kroyeri	Xipkro	84	13	M	1.89
CV	Externa	3	1	2	01.02.2019	2019	1148	XIPKRO-18CA03A1-17II19	Xiphopenaeus kroyeri	Xipkro	45	11	F	0.9
CV	Externa	3	1	2	01.02.2019	2019	1148	XIPKRO-19CA03A1-17II19	Xiphopenaeus kroyeri	Xipkro	82	18	F	3.98
CV	Externa	3	1	2	01.02.2019	2019	1148	XIPKRO-20CA03A1-17II19	Xiphopenaeus kroyeri	Xipkro	61	14	F	1.34
CV	Externa	3	1	2	01.02.2019	2019	1148	XIPKRO-21CA03A1-17II19	Xiphopenaeus kroyeri	Xipkro	49	9	F	0.71
CV	Externa	3	1	2	01.02.2019	2019	1148	XIPKRO-22CA03A1-17II19	Xiphopenaeus kroyeri	Xipkro	65	14	F	1.7
CV	Externa	3	1	2	01.02.2019	2019	1148	XIPKRO-23CA03A1-17II19	Xiphopenaeus kroyeri	Xipkro	68	13	M	1.73
CV	Externa	3	1	2	01.02.2019	2019	1148	XIPKRO-24CA03A1-17II19	Xiphopenaeus kroyeri	Xipkro	50	10	F	1.6
CV	Externa	3	1	2	01.02.2019	2019	1148	XIPKRO-25CA03A1-17II19	Xiphopenaeus kroyeri	Xipkro	60	13	M	1.51
CV	Externa	3	1	2	01.02.2019	2019	1148	XIPKRO-26CA03A1-17II19	Xiphopenaeus kroyeri	Xipkro	60	13	M	1.38
CV	Externa	3	1	2	01.02.2019	2019	1148	XIPKRO-27CA03A1-17II19	Xiphopenaeus kroyeri	Xipkro	49	10	F	0.71
CV	Externa	3	1	2	01.02.2019	2019	1148	XIPKRO-28CA03A1-17II19	Xiphopenaeus kroyeri	Xipkro	60	11	M	1.41
CV	Externa	3	1	2	01.02.2019	2019	1148	XIPKRO-29CA03A1-17II19	Xiphopenaeus kroyeri	Xipkro	40	12	F	1.44
CV	Externa	3	1	2	01.02.2019	2019	1148	XIPKRO-30CA03A1-17II19	Xiphopenaeus kroyeri	Xipkro	44	9	F	0.48
CV	Externa	3	1	2	01.02.2019	2019	1148		Xiphopenaeus kroyeri	Xipkro				70.89
CV	Externa	3	2	2	01.02.2019	2019	1163.38	XIPKRO-01CA03A2-17II19	Xiphopenaeus kroyeri	Xipkro	74	16	F	2.94
CV	Externa	3	2	2	01.02.2019	2019	1163.38	XIPKRO-02CA03A2-17II19	Xiphopenaeus kroyeri	Xipkro	77	15	M	2.56
CV	Externa	3	2	2	01.02.2019	2019	1163.38	XIPKRO-03CA03A2-17II19	Xiphopenaeus kroyeri	Xipkro	75	17	F	2.99
CV	Externa	3	3	2	01.02.2019	2019	1189	XIPKRO-01CA03A3-17II19	Xiphopenaeus kroyeri	Xipkro	85	16	M	4.14
CV	Externa	3	3	2	01.02.2019	2019	1189	XIPKRO-02CA03A3-17II19	Xiphopenaeus kroyeri	Xipkro	68	16	F	2.82
CV	Externa	3	3	2	01.02.2019	2019	1189	XIPKRO-03CA03A3-17II19	Xiphopenaeus kroyeri	Xipkro	78	19	F	2.9
CV	Externa	3	3	2	01.02.2019	2019	1189	XIPKRO-04CA03A3-17II19	Xiphopenaeus kroyeri	Xipkro	60	15	M	2.15
CV	Externa	3	3	2	01.02.2019	2019	1189	XIPKRO-05CA03A3-17II19	Xiphopenaeus kroyeri	Xipkro	72	18	F	2.81
CV	Externa	3	3	2	01.02.2019	2019	1189	XIPKRO-06CA03A3-17II19	Xiphopenaeus kroyeri	Xipkro	63	16	F	1.67
CV	Externa	3	3	2	01.02.2019	2019	1189	XIPKRO-07CA03A3-17II19	Xiphopenaeus kroyeri	Xipkro	49	11	F	0.71
CV	Externa	3	3	2	01.02.2019	2019	1189	XIPKRO-08CA03A3-17II19	Xiphopenaeus kroyeri	Xipkro	45	10	F	0.71
CV	Externa	3	3	2	01.02.2019	2019	1189	XIPKRO-09CA03A3-17II19	Xiphopenaeus kroyeri	Xipkro	76	19	M	3.41
CV	Externa	3	3	2	01.02.2019	2019	1189	XIPKRO-10CA03A3-17II19	Xiphopenaeus kroyeri	Xipkro	71	15	F	1.93
CV	Externa	3	3	2	01.02.2019	2019	1189	XIPKRO-11CA03A3-17II19	Xiphopenaeus kroyeri	Xipkro	54	14	M	1.13
CV	Externa	3	3	2	01.02.2019	2019	1189	XIPKRO-12CA03A3-17II19	Xiphopenaeus kroyeri	Xipkro	64	14	F	1.39
CV	Externa	3	3	2	01.02.2019	2019	1189	XIPKRO-13CA03A3-17II19	Xiphopenaeus kroyeri	Xipkro	59	11	F	1.68
CV	Externa	3	3	2	01.02.2019	2019	1189	XIPKRO-14CA03A3-17II19	Xiphopenaeus kroyeri	Xipkro	58	14	M	1.02
CV	Externa	3	3	2	01.02.2019	2019	1189	XIPKRO-15CA03A3-17II19	Xiphopenaeus kroyeri	Xipkro	54	14	F	1.15
CV	Externa	3	3	2	01.02.2019	2019	1189	XIPKRO-16CA03A3-17II19	Xiphopenaeus kroyeri	Xipkro	56	14	M	1.01
CV	Externa	3	3	2	01.02.2019	2019	1189	XIPKRO-17CA03A3-17II19	Xiphopenaeus kroyeri	Xipkro	62	15	F	1.29
CV	Externa	3	3	2	01.02.2019	2019	1189	XIPKRO-18CA03A3-17II19	Xiphopenaeus kroyeri	Xipkro	54	12	F	0.88
CV	Externa	3	3	2	01.02.2019	2019	1189	XIPKRO-19CA03A3-17II19	Xiphopenaeus kroyeri	Xipkro	50	15	F	0.89
CV	Externa	3	3	2	01.02.2019	2019	1189	XIPKRO-20CA03A3-17II19	Xiphopenaeus kroyeri	Xipkro	50	13	F	1.08
CV	Externa	3	3	2	01.02.2019	2019	1189	XIPKRO-21CA03A3-17II19	Xiphopenaeus kroyeri	Xipkro	64	14	M	1.62
CV	Externa	3	3	2	01.02.2019	2019	1189	XIPKRO-22CA03A3-17II19	Xiphopenaeus kroyeri	Xipkro	71	18	F	1.98
CV	Externa	3	3	2	01.02.2019	2019	1189	XIPKRO-23CA03A3-17II19	Xiphopenaeus kroyeri	Xipkro	63	14	F	1.17
CV	Externa	3	3	2	01.02.2019	2019	1189	XIPKRO-24CA03A3-17II19	Xiphopenaeus kroyeri	Xipkro	55	12	F	1.07
CV	Externa	3	3	2	01.02.2019	2019	1189	XIPKRO-25CA03A3-17II19	Xiphopenaeus kroyeri	Xipkro	45	12	F	0.61
CV	Externa	3	3	2	01.02.2019	2019	1189	XIPKRO-26CA03A3-17II19	Xiphopenaeus kroyeri	Xipkro	58	14	F	1.04
CV	Externa	3	3	2	01.02.2019	2019	1189	XIPKRO-27CA03A3-17II19	Xiphopenaeus kroyeri	Xipkro	43	10	F	0.37
CV	Externa	3	3	2	01.02.2019	2019	1189	XIPKRO-28CA03A3-17II19	Xiphopenaeus kroyeri	Xipkro	63	15	F	1.43
CV	Externa	3	3	2	01.02.2019	2019	1189	XIPKRO-29CA03A3-17II19	Xiphopenaeus kroyeri	Xipkro	42	12	F	0.58
CV	Externa	3	3	2	01.02.2019	2019	1189	XIPKRO-30CA03A3-17II19	Xiphopenaeus kroyeri	Xipkro	42	12	F	0.65
CV	Externa	3	3	2	01.02.2019	2019	1189		Xiphopenaeus kroyeri	Xipkro				95
CV	Externa	4	1	2	01.02.2019	2019	1250.5	XIPKRO-01CA04A1-16II19	Xiphopenaeus kroyeri	Xipkro	65	12	M	1.53
CV	Externa	4	1	2	01.02.2019	2019	1250.5	XIPKRO-02CA04A1-16II19	Xiphopenaeus kroyeri	Xipkro	64	12	M	1.57
CV	Externa	4	1	2	01.02.2019	2019	1250.5	XIPKRO-03CA04A1-16II19	Xiphopenaeus kroyeri	Xipkro	64	13	F	1.56
CV	Externa	4	1	2	01.02.2019	2019	1250.5	XIPKRO-04CA04A1-16II19	Xiphopenaeus kroyeri	Xipkro	63	12	M	1.46
CV	Externa	4	1	2	01.02.2019	2019	1250.5	XIPKRO-05CA04A1-16II19	Xiphopenaeus kroyeri	Xipkro	65	11	F	1.72
CV	Externa	4	1	2	01.02.2019	2019	1250.5	XIPKRO-06CA04A1-16II19	Xiphopenaeus kroyeri	Xipkro	58	11	M	1.26
CV	Externa	4	1	2	01.02.2019	2019	1250.5	XIPKRO-07CA04A1-16II19	Xiphopenaeus kroyeri	Xipkro	69	14	M	1.79
CV	Externa	4	1	2	01.02.2019	2019	1250.5	XIPKRO-08CA04A1-16II19	Xiphopenaeus kroyeri	Xipkro	86	16	M	3.33
CV	Externa	4	1	2	01.02.2019	2019	1250.5	XIPKRO-09CA04A1-16II19	Xiphopenaeus kroyeri	Xipkro	54	11	M	1.01
CV	Externa	4	1	2	01.02.2019	2019	1250.5	XIPKRO-10CA04A1-16II19	Xiphopenaeus kroyeri	Xipkro	47	9	M	0.61
CV	Externa	4	1	2	01.02.2019	2019	1250.5	XIPKRO-11CA04A1-16II19	Xiphopenaeus kroyeri	Xipkro	53	11	F	0.89
CV	Externa	4	1	2	01.02.2019	2019	1250.5	XIPKRO-12CA04A1-16II19	Xiphopenaeus kroyeri	Xipkro	50	11	F	0.88
CV	Externa	4	1	2	01.02.2019	2019	1250.5	XIPKRO-13CA04A1-16II19	Xiphopenaeus kroyeri	Xipkro	59	13	M	1.28
CV	Externa	4	1	2	01.02.2019	2019	1250.5	XIPKRO-14CA04A1-16II19	Xiphopenaeus kroyeri	Xipkro	55	12	M	1.74
CV	Externa	4	1	2	01.02.2019	2019	1250.5	XIPKRO-15CA04A1-16II19	Xiphopenaeus kroyeri	Xipkro	58	12	M	1.26
CV	Externa	4	1	2	01.02.2019	2019	1250.5	XIPKRO-16CA04A1-16II19	Xiphopenaeus kroyeri	Xipkro	48	10	F	0.75
CV	Externa	4	1	2	01.02.2019	2019	1250.5	XIPKRO-17CA04A1-16II19	Xiphopenaeus kroyeri	Xipkro	70	10	M	1.81
CV	Externa	4	1	2	01.02.2019	2019	1250.5	XIPKRO-18CA04A1-16II19	Xiphopenaeus kroyeri	Xipkro	53	11	F	0.87
CV	Externa	4	1	2	01.02.2019	2019	1250.5	XIPKRO-19CA04A1-16II19	Xiphopenaeus kroyeri	Xipkro	57	12	F	1.11
CV	Externa	4	1	2	01.02.2019	2019	1250.5	XIPKRO-20CA04A1-16II19	Xiphopenaeus kroyeri	Xipkro	56	10	M	0.97
CV	Externa	4	1	2	01.02.2019	2019	1250.5	XIPKRO-21CA04A1-16II19	Xiphopenaeus kroyeri	Xipkro	62	14	M	1.69
CV	Externa	4	1	2	01.02.2019	2019	1250.5	XIPKRO-22CA04A1-16II19	Xiphopenaeus kroyeri	Xipkro	83	18	F	3.36
CV	Externa	4	1	2	01.02.2019	2019	1250.5	XIPKRO-23CA04A1-16II19	Xiphopenaeus kroyeri	Xipkro	65	12	F	1.61
CV	Externa	4	1	2	01.02.2019	2019	1250.5	XIPKRO-24CA04A1-16II19	Xiphopenaeus kroyeri	Xipkro	60	14	M	1.3
CV	Externa	4	1	2	01.02.2019	2019	1250.5	XIPKRO-25CA04A1-16II19	Xiphopenaeus kroyeri	Xipkro	59	12	F	1
CV	Externa	4	1	2	01.02.2019	2019	1250.5	XIPKRO-26CA04A1-16II19	Xiphopenaeus kroyeri	Xipkro	53	10	F	0.95
CV	Externa	4	1	2	01.02.2019	2019	1250.5	XIPKRO-27CA04A1-16II19	Xiphopenaeus kroyeri	Xipkro	54	11	M	0.93
CV	Externa	4	1	2	01.02.2019	2019	1250.5	XIPKRO-28CA04A1-16II19	Xiphopenaeus kroyeri	Xipkro	62	14	M	1.15
CV	Externa	4	1	2	01.02.2019	2019	1250.5	XIPKRO-29CA04A1-16II19	Xiphopenaeus kroyeri	Xipkro	79	14	M	2.41
CV	Externa	4	1	2	01.02.2019	2019	1250.5	XIPKRO-30CA04A1-16II19	Xiphopenaeus kroyeri	Xipkro	85	18	M	3.72
CV	Externa	4	1	2	01.02.2019	2019	1250.5		Xiphopenaeus kroyeri	Xipkro				322.28
CV	Externa	4	2	2	01.02.2019	2019	1019.88	XIPKRO-01CA04A2-16II19	Xiphopenaeus kroyeri	Xipkro	88	22	F	5.07
CV	Externa	4	2	2	01.02.2019	2019	1019.88	XIPKRO-02CA04A2-16II19	Xiphopenaeus kroyeri	Xipkro	82	18	F	3.87
CV	Externa	4	2	2	01.02.2019	2019	1019.88	XIPKRO-03CA04A2-16II19	Xiphopenaeus kroyeri	Xipkro	56	12	F	1.1
CV	Externa	4	2	2	01.02.2019	2019	1019.88	XIPKRO-04CA04A2-16II19	Xiphopenaeus kroyeri	Xipkro	69	17	F	2.1
CV	Externa	4	2	2	01.02.2019	2019	1019.88	XIPKRO-05CA04A2-16II19	Xiphopenaeus kroyeri	Xipkro	55	13	F	1.4
CV	Externa	4	2	2	01.02.2019	2019	1019.88	XIPKRO-06CA04A2-16II19	Xiphopenaeus kroyeri	Xipkro	60	14	F	1.57
CV	Externa	4	2	2	01.02.2019	2019	1019.88	XIPKRO-07CA04A2-16II19	Xiphopenaeus kroyeri	Xipkro	81	18	F	3.61
CV	Externa	4	2	2	01.02.2019	2019	1019.88	XIPKRO-08CA04A2-16II19	Xiphopenaeus kroyeri	Xipkro	51	11	M	0.93
CV	Externa	4	2	2	01.02.2019	2019	1019.88	XIPKRO-09CA04A2-16II19	Xiphopenaeus kroyeri	Xipkro	57	12	F	1.24
CV	Externa	4	2	2	01.02.2019	2019	1019.88	XIPKRO-10CA04A2-16II19	Xiphopenaeus kroyeri	Xipkro	56	13	M	1.26
CV	Externa	4	2	2	01.02.2019	2019	1019.88	XIPKRO-11CA04A2-16II19	Xiphopenaeus kroyeri	Xipkro	86	19	F	4.22
CV	Externa	4	2	2	01.02.2019	2019	1019.88	XIPKRO-12CA04A2-16II19	Xiphopenaeus kroyeri	Xipkro	84	18	F	3.63
CV	Externa	4	2	2	01.02.2019	2019	1019.88	XIPKRO-13CA04A2-16II19	Xiphopenaeus kroyeri	Xipkro	79	14	M	2.27
CV	Externa	4	2	2	01.02.2019	2019	1019.88	XIPKRO-14CA04A2-16II19	Xiphopenaeus kroyeri	Xipkro	79	17	F	3.41
CV	Externa	4	2	2	01.02.2019	2019	1019.88	XIPKRO-15CA04A2-16II19	Xiphopenaeus kroyeri	Xipkro	53	12	M	0.95
CV	Externa	4	2	2	01.02.2019	2019	1019.88	XIPKRO-16CA04A2-16II19	Xiphopenaeus kroyeri	Xipkro	65	15	F	1.95
CV	Externa	4	2	2	01.02.2019	2019	1019.88	XIPKRO-17CA04A2-16II19	Xiphopenaeus kroyeri	Xipkro	64	13		1.73
CV	Externa	4	2	2	01.02.2019	2019	1019.88	XIPKRO-18CA04A2-16II19	Xiphopenaeus kroyeri	Xipkro	66	15	F	1.7
CV	Externa	4	2	2	01.02.2019	2019	1019.88	XIPKRO-19CA04A2-16II19	Xiphopenaeus kroyeri	Xipkro	64	16	M	1.79
CV	Externa	4	2	2	01.02.2019	2019	1019.88	XIPKRO-20CA04A2-16II19	Xiphopenaeus kroyeri	Xipkro	63	13	M	1.65
CV	Externa	4	2	2	01.02.2019	2019	1019.88	XIPKRO-21CA04A2-16II19	Xiphopenaeus kroyeri	Xipkro	51	11	F	0.9
CV	Externa	4	2	2	01.02.2019	2019	1019.88	XIPKRO-22CA04A2-16II19	Xiphopenaeus kroyeri	Xipkro	86	20	F	4.22
CV	Externa	4	2	2	01.02.2019	2019	1019.88	XIPKRO-23CA04A2-16II19	Xiphopenaeus kroyeri	Xipkro	55	11	F	1.07
CV	Externa	4	2	2	01.02.2019	2019	1019.88	XIPKRO-24CA04A2-16II19	Xiphopenaeus kroyeri	Xipkro	55	12	F	1.34
CV	Externa	4	2	2	01.02.2019	2019	1019.88	XIPKRO-25CA04A2-16II19	Xiphopenaeus kroyeri	Xipkro	66	15	M	2.81
CV	Externa	4	2	2	01.02.2019	2019	1019.88	XIPKRO-26CA04A2-16II19	Xiphopenaeus kroyeri	Xipkro	77	18	F	2.91
CV	Externa	4	2	2	01.02.2019	2019	1019.88	XIPKRO-27CA04A2-16II19	Xiphopenaeus kroyeri	Xipkro	62	13	M	1.04
CV	Externa	4	2	2	01.02.2019	2019	1019.88	XIPKRO-28CA04A2-16II19	Xiphopenaeus kroyeri	Xipkro	74	17	M	2.15
CV	Externa	4	2	2	01.02.2019	2019	1019.88	XIPKRO-29CA04A2-16II19	Xiphopenaeus kroyeri	Xipkro	82	18	F	3.27
CV	Externa	4	2	2	01.02.2019	2019	1019.88	XIPKRO-30CA04A2-16II19	Xiphopenaeus kroyeri	Xipkro	67	15	F	2.05
CV	Externa	4	2	2	01.02.2019	2019	1019.88	XIPKRO-31CA04A2-16II19	Xiphopenaeus kroyeri	Xipkro	72	15	F	2.62
CV	Externa	4	2	2	01.02.2019	2019	1019.88		Xiphopenaeus kroyeri	Xipkro				647.48
CV	Externa	4	3	2	01.02.2019	2019	2106.38	XIPKRO-01CA04A3-16II19	Xiphopenaeus kroyeri	Xipkro	88	19	F	4.66
CV	Externa	4	3	2	01.02.2019	2019	2106.38	XIPKRO-02CA04A3-16II19	Xiphopenaeus kroyeri	Xipkro	65	15	M	1.71
CV	Externa	4	3	2	01.02.2019	2019	2106.38	XIPKRO-03CA04A3-16II19	Xiphopenaeus kroyeri	Xipkro	74	15	F	2.43
CV	Externa	4	3	2	01.02.2019	2019	2106.38	XIPKRO-04CA04A3-16II19	Xiphopenaeus kroyeri	Xipkro	48	10	F	0.8
CV	Externa	4	3	2	01.02.2019	2019	2106.38	XIPKRO-05CA04A3-16II19	Xiphopenaeus kroyeri	Xipkro	48	11	F	0.75
CV	Externa	4	3	2	01.02.2019	2019	2106.38	XIPKRO-06CA04A3-16II19	Xiphopenaeus kroyeri	Xipkro	43	10	F	0.53
CV	Externa	5	3	2	01.02.2019	2019	1178.75	XIPKRO-01CA05A3-16II19	Xiphopenaeus kroyeri	Xipkro	62	12	F	1.46
CV	Externa	5	3	2	01.02.2019	2019	1178.75	XIPKRO-02CA05A3-16II19	Xiphopenaeus kroyeri	Xipkro	86	17	F	4.07
CV	Externa	5	3	2	01.02.2019	2019	1178.75	XIPKRO-03CA05A3-16II19	Xiphopenaeus kroyeri	Xipkro	56	10	M	1.09
CV	Externa	5	3	2	01.02.2019	2019	1178.75	XIPKRO-04CA05A3-16II19	Xiphopenaeus kroyeri	Xipkro	52	10	F	1.02
CV	Externa	5	3	2	01.02.2019	2019	1178.75	XIPKRO-05CA05A3-16II19	Xiphopenaeus kroyeri	Xipkro	37	7	M	0.41
CV	Externa	5	3	2	01.02.2019	2019	1178.75	XIPKRO-06CA05A3-16II19	Xiphopenaeus kroyeri	Xipkro	45	10	F	0.57
CV	Externa	5	3	2	01.02.2019	2019	1178.75	XIPKRO-07CA05A3-16II19	Xiphopenaeus kroyeri	Xipkro	37	7	F	0.32
CV	Externa	6	1	2	01.02.2019	2019	1194.12	XIPKRO-01CA06A1-17II19	Xiphopenaeus kroyeri	Xipkro	75	15	F	3.46
CV	Externa	6	1	2	01.02.2019	2019	1194.12	XIPKRO-02CA06A1-17II19	Xiphopenaeus kroyeri	Xipkro	71	14	F	3.52
CV	Externa	6	1	2	01.02.2019	2019	1194.12	XIPKRO-03CA06A1-17II19	Xiphopenaeus kroyeri	Xipkro	62	13	F	2.1
CV	Externa	6	1	2	01.02.2019	2019	1194.12	XIPKRO-04CA06A1-17II19	Xiphopenaeus kroyeri	Xipkro	71	15	F	3.12
CV	Externa	6	1	2	01.02.2019	2019	1194.12	XIPKRO-05CA06A1-17II19	Xiphopenaeus kroyeri	Xipkro	52	11	M	1.28
CV	Externa	6	1	2	01.02.2019	2019	1194.12	XIPKRO-06CA06A1-17II19	Xiphopenaeus kroyeri	Xipkro	57	12	F	1.57
CV	Externa	6	1	2	01.02.2019	2019	1194.12	XIPKRO-07CA06A1-17II19	Xiphopenaeus kroyeri	Xipkro	69	14	M	2.82
CV	Externa	6	1	2	01.02.2019	2019	1194.12	XIPKRO-08CA06A1-17II19	Xiphopenaeus kroyeri	Xipkro	51	10	M	1.05
CV	Externa	6	1	2	01.02.2019	2019	1194.12	XIPKRO-09CA06A1-17II19	Xiphopenaeus kroyeri	Xipkro	64	12	M	2.41
CV	Externa	6	1	2	01.02.2019	2019	1194.12	XIPKRO-10CA06A1-17II19	Xiphopenaeus kroyeri	Xipkro	61	13	F	2.08
CV	Externa	6	1	2	01.02.2019	2019	1194.12	XIPKRO-11CA06A1-17II19	Xiphopenaeus kroyeri	Xipkro	66	14	F	2.36
CV	Externa	6	1	2	01.02.2019	2019	1194.12	XIPKRO-12CA06A1-17II19	Xiphopenaeus kroyeri	Xipkro	64	13	F	2.57
CV	Externa	6	1	2	01.02.2019	2019	1194.12	XIPKRO-13CA06A1-17II19	Xiphopenaeus kroyeri	Xipkro	50	9	F	1.37
CV	Externa	6	1	2	01.02.2019	2019	1194.12	XIPKRO-14CA06A1-17II19	Xiphopenaeus kroyeri	Xipkro	61	13	M	1.9
CV	Externa	6	1	2	01.02.2019	2019	1194.12	XIPKRO-15CA06A1-17II19	Xiphopenaeus kroyeri	Xipkro	45	10	M	0.78
CV	Externa	6	1	2	01.02.2019	2019	1194.12	XIPKRO-16CA06A1-17II19	Xiphopenaeus kroyeri	Xipkro	54	11	M	1.02
CV	Externa	6	1	2	01.02.2019	2019	1194.12	XIPKRO-17CA06A1-17II19	Xiphopenaeus kroyeri	Xipkro	54	11	F	1.51
CV	Externa	6	1	2	01.02.2019	2019	1194.12	XIPKRO-18CA06A1-17II19	Xiphopenaeus kroyeri	Xipkro	55	11	F	1.52
CV	Externa	6	1	2	01.02.2019	2019	1194.12	XIPKRO-19CA06A1-17II19	Xiphopenaeus kroyeri	Xipkro	68	16	F	2.99
CV	Externa	6	1	2	01.02.2019	2019	1194.12	XIPKRO-20CA06A1-17II19	Xiphopenaeus kroyeri	Xipkro	63	14	F	2.08
CV	Externa	6	1	2	01.02.2019	2019	1194.12	XIPKRO-21CA06A1-17II19	Xiphopenaeus kroyeri	Xipkro	81	19	F	5.03
CV	Externa	6	1	2	01.02.2019	2019	1194.12	XIPKRO-22CA06A1-17II19	Xiphopenaeus kroyeri	Xipkro	50	11	M	1.07
CV	Externa	6	1	2	01.02.2019	2019	1194.12	XIPKRO-23CA06A1-17II19	Xiphopenaeus kroyeri	Xipkro	52	11	F	1.41
CV	Externa	6	1	2	01.02.2019	2019	1194.12	XIPKRO-24CA06A1-17II19	Xiphopenaeus kroyeri	Xipkro	55	10	M	1.52
CV	Externa	6	1	2	01.02.2019	2019	1194.12	XIPKRO-25CA06A1-17II19	Xiphopenaeus kroyeri	Xipkro	53	10	F	1.39
CV	Externa	6	1	2	01.02.2019	2019	1194.12	XIPKRO-26CA06A1-17II19	Xiphopenaeus kroyeri	Xipkro	69	15	F	2.93
CV	Externa	6	1	2	01.02.2019	2019	1194.12	XIPKRO-27CA06A1-17II19	Xiphopenaeus kroyeri	Xipkro	55	10	F	1.6
CV	Externa	6	1	2	01.02.2019	2019	1194.12	XIPKRO-28CA06A1-17II19	Xiphopenaeus kroyeri	Xipkro	57	12	F	1.92
CV	Externa	6	1	2	01.02.2019	2019	1194.12	XIPKRO-29CA06A1-17II19	Xiphopenaeus kroyeri	Xipkro	75	17	F	4.18
CV	Externa	6	1	2	01.02.2019	2019	1194.12	XIPKRO-30CA06A1-17II19	Xiphopenaeus kroyeri	Xipkro	64	14	M	2.83
CV	Externa	6	1	2	01.02.2019	2019	1194.12		Xiphopenaeus kroyeri	Xipkro				62.72
CV	Externa	6	2	2	01.02.2019	2019	809.75	XIPKRO-01CA06A2-17II19	Xiphopenaeus kroyeri	Xipkro	51	10	F	0.94
CV	Externa	6	2	2	01.02.2019	2019	809.75	XIPKRO-02CA06A2-17II19	Xiphopenaeus kroyeri	Xipkro	47	10	F	0.77
CV	Externa	6	2	2	01.02.2019	2019	809.75	XIPKRO-03CA06A2-17II19	Xiphopenaeus kroyeri	Xipkro	80	15	M	2.66
CV	Externa	6	2	2	01.02.2019	2019	809.75	XIPKRO-04CA06A2-17II19	Xiphopenaeus kroyeri	Xipkro	61	11	M	1.21
CV	Externa	6	2	2	01.02.2019	2019	809.75	XIPKRO-05CA06A2-17II19	Xiphopenaeus kroyeri	Xipkro	83	16	F	3.39
CV	Externa	6	2	2	01.02.2019	2019	809.75	XIPKRO-06CA06A2-17II19	Xiphopenaeus kroyeri	Xipkro	63	11	M	1.23
CV	Externa	6	2	2	01.02.2019	2019	809.75	XIPKRO-07CA06A2-17II19	Xiphopenaeus kroyeri	Xipkro	70	13	M	2.07
CV	Externa	6	2	2	01.02.2019	2019	809.75	XIPKRO-08CA06A2-17II19	Xiphopenaeus kroyeri	Xipkro	83	16	F	3.88
CV	Externa	6	2	2	01.02.2019	2019	809.75	XIPKRO-09CA06A2-17II19	Xiphopenaeus kroyeri	Xipkro	62	11	M	1.6
CV	Externa	6	2	2	01.02.2019	2019	809.75	XIPKRO-10CA06A2-17II19	Xiphopenaeus kroyeri	Xipkro	50	8	F	0.68
CV	Externa	6	2	2	01.02.2019	2019	809.75	XIPKRO-11CA06A2-17II19	Xiphopenaeus kroyeri	Xipkro	54	10	M	1.15
CV	Externa	6	2	2	01.02.2019	2019	809.75	XIPKRO-12CA06A2-17II19	Xiphopenaeus kroyeri	Xipkro	58	11	F	1.02
CV	Externa	6	2	2	01.02.2019	2019	809.75	XIPKRO-13CA06A2-17II19	Xiphopenaeus kroyeri	Xipkro	65	13	F	1.58
CV	Externa	6	2	2	01.02.2019	2019	809.75	XIPKRO-14CA06A2-17II19	Xiphopenaeus kroyeri	Xipkro	59	11	M	1.2
CV	Externa	6	2	2	01.02.2019	2019	809.75	XIPKRO-15CA06A2-17II19	Xiphopenaeus kroyeri	Xipkro	58	12	F	1.09
CV	Externa	6	2	2	01.02.2019	2019	809.75	XIPKRO-16CA06A2-17II19	Xiphopenaeus kroyeri	Xipkro	54	9	F	1
CV	Externa	6	2	2	01.02.2019	2019	809.75	XIPKRO-17CA06A2-17II19	Xiphopenaeus kroyeri	Xipkro	38	8	F	0.51
CV	Externa	6	2	2	01.02.2019	2019	809.75	XIPKRO-18CA06A2-17II19	Xiphopenaeus kroyeri	Xipkro	66	12	M	1.57
CV	Externa	6	2	2	01.02.2019	2019	809.75	XIPKRO-19CA06A2-17II19	Xiphopenaeus kroyeri	Xipkro	54	9	F	1.02
CV	Externa	6	2	2	01.02.2019	2019	809.75	XIPKRO-20CA06A2-17II19	Xiphopenaeus kroyeri	Xipkro	57	10	F	1.15
CV	Externa	6	2	2	01.02.2019	2019	809.75	XIPKRO-21CA06A2-17II19	Xiphopenaeus kroyeri	Xipkro	52	10	M	0.81
CV	Externa	6	2	2	01.02.2019	2019	809.75	XIPKRO-22CA06A2-17II19	Xiphopenaeus kroyeri	Xipkro	43	9	F	0.54
CV	Externa	6	2	2	01.02.2019	2019	809.75	XIPKRO-23CA06A2-17II19	Xiphopenaeus kroyeri	Xipkro	33	7	F	0.27
CV	Externa	6	2	2	01.02.2019	2019	809.75	XIPKRO-24CA06A2-17II19	Xiphopenaeus kroyeri	Xipkro	61	10	M	1.33
CV	Externa	6	2	2	01.02.2019	2019	809.75	XIPKRO-25CA06A2-17II19	Xiphopenaeus kroyeri	Xipkro	62	15	M	3
CV	Externa	6	2	2	01.02.2019	2019	809.75	XIPKRO-26CA06A2-17II19	Xiphopenaeus kroyeri	Xipkro	86	16	M	3.73
CV	Externa	6	2	2	01.02.2019	2019	809.75	XIPKRO-27CA06A2-17II19	Xiphopenaeus kroyeri	Xipkro	47	9	F	4.37
CV	Externa	6	2	2	01.02.2019	2019	809.75	XIPKRO-28CA06A2-17II19	Xiphopenaeus kroyeri	Xipkro	62	12	M	1.34
CV	Externa	6	2	2	01.02.2019	2019	809.75	XIPKRO-29CA06A2-17II19	Xiphopenaeus kroyeri	Xipkro	70	13	F	2.29
CV	Externa	6	2	2	01.02.2019	2019	809.75	XIPKRO-30CA06A2-17II19	Xiphopenaeus kroyeri	Xipkro	62	12	F	1.31
CV	Externa	6	2	2	01.02.2019	2019	809.75		Xiphopenaeus kroyeri	Xipkro				125.55
SM	Externa	3	1	2	01.02.2019	2019	1178.75	XIPKRO-01SM03A1-11II19	Xiphopenaeus kroyeri	Xipkro	84	17	F	2.63
SM	Externa	3	1	2	01.02.2019	2019	1178.75	XIPKRO-02SM03A1-11II19	Xiphopenaeus kroyeri	Xipkro	86	16	F	2.45
SM	Externa	3	1	2	01.02.2019	2019	1178.75	XIPKRO-03SM03A1-11II19	Xiphopenaeus kroyeri	Xipkro	65	17	F	2.42
SM	Externa	3	1	2	01.02.2019	2019	1178.75	XIPKRO-04SM03A1-11II19	Xiphopenaeus kroyeri	Xipkro	85	17	M	2.87
SM	Externa	3	1	2	01.02.2019	2019	1178.75	XIPKRO-05SM03A1-11II19	Xiphopenaeus kroyeri	Xipkro	63	14	M	1.32
SM	Externa	3	1	2	01.02.2019	2019	1178.75	XIPKRO-06SM03A1-11II19	Xiphopenaeus kroyeri	Xipkro	49	9	F	0.53
SM	Externa	3	1	2	01.02.2019	2019	1178.75	XIPKRO-07SM03A1-11II19	Xiphopenaeus kroyeri	Xipkro	60	12	F	0.89
SM	Externa	3	1	2	01.02.2019	2019	1178.75	XIPKRO-08SM03A1-11II19	Xiphopenaeus kroyeri	Xipkro	75	16	M	2.06
SM	Externa	3	1	2	01.02.2019	2019	1178.75	XIPKRO-09SM03A1-11II19	Xiphopenaeus kroyeri	Xipkro	71	15	F	1.44
SM	Externa	3	1	2	01.02.2019	2019	1178.75	XIPKRO-10SM03A1-11II19	Xiphopenaeus kroyeri	Xipkro	77	18	F	2.8
SM	Externa	3	1	2	01.02.2019	2019	1178.75	XIPKRO-11SM03A1-11II19	Xiphopenaeus kroyeri	Xipkro	72	16	F	2.1
SM	Externa	3	1	2	01.02.2019	2019	1178.75	XIPKRO-12SM03A1-11II19	Xiphopenaeus kroyeri	Xipkro	67	14	M	1.71
SM	Externa	3	1	2	01.02.2019	2019	1178.75	XIPKRO-13SM03A1-11II19	Xiphopenaeus kroyeri	Xipkro	60	11	F	0.66
SM	Externa	3	1	2	01.02.2019	2019	1178.75	XIPKRO-14SM03A1-11II19	Xiphopenaeus kroyeri	Xipkro	60	14	F	1.08
SM	Externa	3	1	2	01.02.2019	2019	1178.75	XIPKRO-15SM03A1-11II19	Xiphopenaeus kroyeri	Xipkro	60	14	F	0.99
SM	Externa	3	1	2	01.02.2019	2019	1178.75	XIPKRO-16SM03A1-11II19	Xiphopenaeus kroyeri	Xipkro	56	13	M	1.09
SM	Externa	3	1	2	01.02.2019	2019	1178.75	XIPKRO-17SM03A1-11II19	Xiphopenaeus kroyeri	Xipkro	69	14	F	1.91
SM	Externa	3	1	2	01.02.2019	2019	1178.75	XIPKRO-18SM03A1-11II19	Xiphopenaeus kroyeri	Xipkro	55	13	M	1.25
SM	Externa	3	1	2	01.02.2019	2019	1178.75	XIPKRO-19SM03A1-11II19	Xiphopenaeus kroyeri	Xipkro	62	12	F	1.32
SM	Externa	3	1	2	01.02.2019	2019	1178.75	XIPKRO-20SM03A1-11II19	Xiphopenaeus kroyeri	Xipkro	80	16	F	3.12
SM	Externa	3	1	2	01.02.2019	2019	1178.75	XIPKRO-21SM03A1-11II19	Xiphopenaeus kroyeri	Xipkro	72	15	F	1.97
SM	Externa	3	1	2	01.02.2019	2019	1178.75	XIPKRO-22SM03A1-11II19	Xiphopenaeus kroyeri	Xipkro	82	14	F	2.45
SM	Externa	3	1	2	01.02.2019	2019	1178.75	XIPKRO-23SM03A1-11II19	Xiphopenaeus kroyeri	Xipkro	58	11	F	0.94
SM	Externa	3	1	2	01.02.2019	2019	1178.75	XIPKRO-24SM03A1-11II19	Xiphopenaeus kroyeri	Xipkro	73	14	M	1.83
SM	Externa	3	1	2	01.02.2019	2019	1178.75	XIPKRO-25SM03A1-11II19	Xiphopenaeus kroyeri	Xipkro	74	16	F	2.2
SM	Externa	3	1	2	01.02.2019	2019	1178.75	XIPKRO-26SM03A1-11II19	Xiphopenaeus kroyeri	Xipkro	84	18	F	3.17
SM	Externa	3	1	2	01.02.2019	2019	1178.75	XIPKRO-27SM03A1-11II19	Xiphopenaeus kroyeri	Xipkro	90	19	F	3.18
SM	Externa	3	1	2	01.02.2019	2019	1178.75	XIPKRO-28SM03A1-11II19	Xiphopenaeus kroyeri	Xipkro	72	16	F	2.05
SM	Externa	3	1	2	01.02.2019	2019	1178.75	XIPKRO-29SM03A1-11II19	Xiphopenaeus kroyeri	Xipkro	93	20	F	4.27
SM	Externa	3	1	2	01.02.2019	2019	1178.75	XIPKRO-30SM03A1-11II19	Xiphopenaeus kroyeri	Xipkro	75	15	M	2.12
SM	Externa	3	1	2	01.02.2019	2019	1178.75		Xiphopenaeus kroyeri	Xipkro				423.62
CV	Externa	3	1	3	01.03.2019	2019	1183.88	XIPKRO-01CA03A1-13III19	Xiphopenaeus kroyeri	Xipkro	77	16	M	2.96
CV	Externa	3	1	3	01.03.2019	2019	1183.88	XIPKRO-02CA03A1-13III19	Xiphopenaeus kroyeri	Xipkro	85	17	M	3.93
CV	Externa	3	1	3	01.03.2019	2019	1183.88	XIPKRO-03CA03A1-13III19	Xiphopenaeus kroyeri	Xipkro	76	17	F	3.02
CV	Externa	3	1	3	01.03.2019	2019	1183.88	XIPKRO-04CA03A1-13III19	Xiphopenaeus kroyeri	Xipkro	84	15	M	3.62
CV	Externa	3	1	3	01.03.2019	2019	1183.88	XIPKRO-05CA03A1-13III19	Xiphopenaeus kroyeri	Xipkro	51	11	M	0.93
CV	Externa	3	1	3	01.03.2019	2019	1183.88	XIPKRO-06CA03A1-13III19	Xiphopenaeus kroyeri	Xipkro	55	11	M	1
CV	Externa	3	1	3	01.03.2019	2019	1183.88	XIPKRO-07CA03A1-13III19	Xiphopenaeus kroyeri	Xipkro	60	12	M	1.38
CV	Externa	3	1	3	01.03.2019	2019	1183.88	XIPKRO-08CA03A1-13III19	Xiphopenaeus kroyeri	Xipkro	56	11	M	1.37
CV	Externa	3	1	3	01.03.2019	2019	1183.88	XIPKRO-09CA03A1-13III19	Xiphopenaeus kroyeri	Xipkro	72	13	M	2.13
CV	Externa	3	1	3	01.03.2019	2019	1183.88	XIPKRO-10CA03A1-13III19	Xiphopenaeus kroyeri	Xipkro	60	11	M	1.11
CV	Externa	3	1	3	01.03.2019	2019	1183.88	XIPKRO-11CA03A1-13III19	Xiphopenaeus kroyeri	Xipkro	74	15	F	2.45
CV	Externa	3	1	3	01.03.2019	2019	1183.88	XIPKRO-12CA03A1-13III19	Xiphopenaeus kroyeri	Xipkro	83	17	M	3.34
CV	Externa	3	1	3	01.03.2019	2019	1183.88	XIPKRO-13CA03A1-13III19	Xiphopenaeus kroyeri	Xipkro	66	13	M	1.83
CV	Externa	3	1	3	01.03.2019	2019	1183.88	XIPKRO-14CA03A1-13III19	Xiphopenaeus kroyeri	Xipkro	56	12	F	0.93
CV	Externa	3	1	3	01.03.2019	2019	1183.88	XIPKRO-15CA03A1-13III19	Xiphopenaeus kroyeri	Xipkro	60	11	M	1.31
CV	Externa	3	1	3	01.03.2019	2019	1183.88	XIPKRO-16CA03A1-13III19	Xiphopenaeus kroyeri	Xipkro	51	9	F	0.73
CV	Externa	3	1	3	01.03.2019	2019	1183.88	XIPKRO-17CA03A1-13III19	Xiphopenaeus kroyeri	Xipkro	73	15	F	2.72
CV	Externa	3	1	3	01.03.2019	2019	1183.88	XIPKRO-18CA03A1-13III19	Xiphopenaeus kroyeri	Xipkro	77	11	M	1.06
CV	Externa	3	1	3	01.03.2019	2019	1183.88	XIPKRO-19CA03A1-13III19	Xiphopenaeus kroyeri	Xipkro	52	10	F	1.9
CV	Externa	3	1	3	01.03.2019	2019	1183.88	XIPKRO-20CA03A1-13III19	Xiphopenaeus kroyeri	Xipkro	65	13	M	0.86
CV	Externa	3	1	3	01.03.2019	2019	1183.88	XIPKRO-21CA03A1-13III19	Xiphopenaeus kroyeri	Xipkro	74	15	M	2.47
CV	Externa	3	1	3	01.03.2019	2019	1183.88	XIPKRO-22CA03A1-13III19	Xiphopenaeus kroyeri	Xipkro	57	12	M	1.18
CV	Externa	3	1	3	01.03.2019	2019	1183.88	XIPKRO-23CA03A1-13III19	Xiphopenaeus kroyeri	Xipkro	57	11	M	1.09
CV	Externa	3	1	3	01.03.2019	2019	1183.88	XIPKRO-24CA03A1-13III19	Xiphopenaeus kroyeri	Xipkro	87	18	M	4.05
CV	Externa	3	1	3	01.03.2019	2019	1183.88	XIPKRO-25CA03A1-13III19	Xiphopenaeus kroyeri	Xipkro	92	19	M	5.09
CV	Externa	3	1	3	01.03.2019	2019	1183.88	XIPKRO-26CA03A1-13III19	Xiphopenaeus kroyeri	Xipkro	66	13	F	1.64
CV	Externa	3	1	3	01.03.2019	2019	1183.88	XIPKRO-27CA03A1-13III19	Xiphopenaeus kroyeri	Xipkro	64	13	M	1.8
CV	Externa	3	1	3	01.03.2019	2019	1183.88	XIPKRO-28CA03A1-13III19	Xiphopenaeus kroyeri	Xipkro	60	13	M	1.21
CV	Externa	3	1	3	01.03.2019	2019	1183.88	XIPKRO-29CA03A1-13III19	Xiphopenaeus kroyeri	Xipkro	59	11	M	1.15
CV	Externa	3	1	3	01.03.2019	2019	1183.88	XIPKRO-30CA03A1-13III19	Xiphopenaeus kroyeri	Xipkro	55	12	M	1.24
CV	Externa	3	1	3	01.03.2019	2019	1183.88		Xiphopenaeus kroyeri	Xipkro				59.75
CV	Externa	3	3	3	01.03.2019	2019	440.75	XIPKRO-01CA03A3-13III19	Xiphopenaeus kroyeri	Xipkro	58	12	F	1.31
CV	Externa	3	3	3	01.03.2019	2019	440.75	XIPKRO-02CA03A3-13III19	Xiphopenaeus kroyeri	Xipkro	69	13	F	2.03
CV	Externa	3	3	3	01.03.2019	2019	440.75	XIPKRO-03CA03A3-13III19	Xiphopenaeus kroyeri	Xipkro	93	22	F	5.48
CV	Externa	3	3	3	01.03.2019	2019	440.75	XIPKRO-04CA03A3-13III19	Xiphopenaeus kroyeri	Xipkro	62	13	F	1.37
CV	Externa	3	3	3	01.03.2019	2019	440.75	XIPKRO-05CA03A3-13III19	Xiphopenaeus kroyeri	Xipkro	80	16	F	3.42
CV	Externa	3	3	3	01.03.2019	2019	440.75	XIPKRO-06CA03A3-13III19	Xiphopenaeus kroyeri	Xipkro	102	22	F	6.4
CV	Externa	3	3	3	01.03.2019	2019	440.75	XIPKRO-07CA03A3-13III19	Xiphopenaeus kroyeri	Xipkro	97	21	F	3.05
IP	Externa	3	1	3	01.03.2019	2019	1260.75	XIPKRO-01IP03A1-12III19	Xiphopenaeus kroyeri	Xipkro	76	16	M	2.48
IP	Externa	3	1	3	01.03.2019	2019	1260.75	XIPKRO-02IP03A1-12III19	Xiphopenaeus kroyeri	Xipkro	80	21	F	2.96
IP	Externa	3	1	3	01.03.2019	2019	1260.75	XIPKRO-03IP03A1-12III19	Xiphopenaeus kroyeri	Xipkro	82	21	M	4.18
IP	Externa	3	1	3	01.03.2019	2019	1260.75	XIPKRO-04IP03A1-12III19	Xiphopenaeus kroyeri	Xipkro	80	22	F	4.12
IP	Externa	3	1	3	01.03.2019	2019	1260.75	XIPKRO-05IP03A1-12III19	Xiphopenaeus kroyeri	Xipkro	92	24	F	4.96
IP	Externa	3	1	3	01.03.2019	2019	1260.75	XIPKRO-06IP03A1-12III19	Xiphopenaeus kroyeri	Xipkro	95	27	F	5.95
IP	Externa	3	1	3	01.03.2019	2019	1260.75	XIPKRO-07IP03A1-12III19	Xiphopenaeus kroyeri	Xipkro	72	18	F	2.46
IP	Externa	3	1	3	01.03.2019	2019	1260.75	XIPKRO-08IP03A1-12III19	Xiphopenaeus kroyeri	Xipkro	96	25	F	5.18
IP	Externa	3	1	3	01.03.2019	2019	1260.75	XIPKRO-09IP03A1-12III19	Xiphopenaeus kroyeri	Xipkro	100	28	F	6.79
IP	Externa	3	1	3	01.03.2019	2019	1260.75	XIPKRO-10IP03A1-12III19	Xiphopenaeus kroyeri	Xipkro	100	26	F	5.75
IP	Externa	3	1	3	01.03.2019	2019	1260.75	XIPKRO-11IP03A1-12III19	Xiphopenaeus kroyeri	Xipkro	92	23	M	4.8
IP	Externa	3	1	3	01.03.2019	2019	1260.75	XIPKRO-12IP03A1-12III19	Xiphopenaeus kroyeri	Xipkro	100	25	F	7.18
IP	Externa	3	1	3	01.03.2019	2019	1260.75	XIPKRO-13IP03A1-12III19	Xiphopenaeus kroyeri	Xipkro	87	22	M	4.45
IP	Externa	3	1	3	01.03.2019	2019	1260.75	XIPKRO-14IP03A1-12III19	Xiphopenaeus kroyeri	Xipkro	80	16	M	2.91
IP	Externa	3	1	3	01.03.2019	2019	1260.75	XIPKRO-15IP03A1-12III19	Xiphopenaeus kroyeri	Xipkro	70	18	F	2.18
IP	Externa	3	1	3	01.03.2019	2019	1260.75	XIPKRO-16IP03A1-12III19	Xiphopenaeus kroyeri	Xipkro	82	21	F	3.21
IP	Externa	3	1	3	01.03.2019	2019	1260.75	XIPKRO-17IP03A1-12III19	Xiphopenaeus kroyeri	Xipkro	86	20	M	4.93
IP	Externa	3	1	3	01.03.2019	2019	1260.75	XIPKRO-18IP03A1-12III19	Xiphopenaeus kroyeri	Xipkro	76	19	M	2.97
IP	Externa	3	1	3	01.03.2019	2019	1260.75	XIPKRO-19IP03A1-12III19	Xiphopenaeus kroyeri	Xipkro	65	18	M	3.06
IP	Externa	3	1	3	01.03.2019	2019	1260.75	XIPKRO-20IP03A1-12III19	Xiphopenaeus kroyeri	Xipkro	95	24	M	6
IP	Externa	3	1	3	01.03.2019	2019	1260.75	XIPKRO-21IP03A1-12III19	Xiphopenaeus kroyeri	Xipkro	84	22	F	3.54
IP	Externa	3	1	3	01.03.2019	2019	1260.75	XIPKRO-22IP03A1-12III19	Xiphopenaeus kroyeri	Xipkro	77	20	M	3.55
IP	Externa	3	1	3	01.03.2019	2019	1260.75	XIPKRO-23IP03A1-12III19	Xiphopenaeus kroyeri	Xipkro	85	24	M	7.89
IP	Externa	3	1	3	01.03.2019	2019	1260.75	XIPKRO-24IP03A1-12III19	Xiphopenaeus kroyeri	Xipkro	92	24	M	4.57
IP	Externa	3	1	3	01.03.2019	2019	1260.75	XIPKRO-25IP03A1-12III19	Xiphopenaeus kroyeri	Xipkro	76	20	F	2.67
IP	Externa	3	1	3	01.03.2019	2019	1260.75	XIPKRO-26IP03A1-12III19	Xiphopenaeus kroyeri	Xipkro	77	18	M	3.3
IP	Externa	3	1	3	01.03.2019	2019	1260.75	XIPKRO-27IP03A1-12III19	Xiphopenaeus kroyeri	Xipkro	60	15	M	1.43
IP	Externa	3	1	3	01.03.2019	2019	1260.75	XIPKRO-28IP03A1-12III19	Xiphopenaeus kroyeri	Xipkro	97	28	F	6.19
IP	Externa	3	1	3	01.03.2019	2019	1260.75	XIPKRO-29IP03A1-12III19	Xiphopenaeus kroyeri	Xipkro	80	20	F	3.24
IP	Externa	3	2	3	01.03.2019	2019	1450.38	XIPKRO-01IP03A2-12III19	Xiphopenaeus kroyeri	Xipkro	92	21	F	4.42
IP	Externa	3	2	3	01.03.2019	2019	1450.38	XIPKRO-02IP03A2-12III19	Xiphopenaeus kroyeri	Xipkro	71	15	M	1.96
IP	Externa	3	2	3	01.03.2019	2019	1450.38	XIPKRO-03IP03A2-12III19	Xiphopenaeus kroyeri	Xipkro	85	19	M	5.08
IP	Externa	3	2	3	01.03.2019	2019	1450.38	XIPKRO-04IP03A2-12III19	Xiphopenaeus kroyeri	Xipkro	85	20	F	3.52
IP	Externa	3	2	3	01.03.2019	2019	1450.38	XIPKRO-05IP03A2-12III19	Xiphopenaeus kroyeri	Xipkro	88	20	M	4.95
IP	Externa	3	2	3	01.03.2019	2019	1450.38	XIPKRO-06IP03A2-12III19	Xiphopenaeus kroyeri	Xipkro	88	17	M	4.41
IP	Externa	3	2	3	01.03.2019	2019	1450.38	XIPKRO-07IP03A2-12III19	Xiphopenaeus kroyeri	Xipkro	95	20	M	5.86
IP	Externa	3	2	3	01.03.2019	2019	1450.38	XIPKRO-08IP03A2-12III19	Xiphopenaeus kroyeri	Xipkro	88	20	M	4.31
IP	Externa	3	2	3	01.03.2019	2019	1450.38	XIPKRO-09IP03A2-12III19	Xiphopenaeus kroyeri	Xipkro	83	24	F	4.48
IP	Externa	3	2	3	01.03.2019	2019	1450.38	XIPKRO-10IP03A2-12III19	Xiphopenaeus kroyeri	Xipkro	89	20	M	4.25
IP	Externa	3	2	3	01.03.2019	2019	1450.38	XIPKRO-11IP03A2-12III19	Xiphopenaeus kroyeri	Xipkro	93	21	M	4.78
IP	Externa	3	2	3	01.03.2019	2019	1450.38	XIPKRO-12IP03A2-12III19	Xiphopenaeus kroyeri	Xipkro	85	20	M	4.65
IP	Externa	3	2	3	01.03.2019	2019	1450.38	XIPKRO-13IP03A2-12III19	Xiphopenaeus kroyeri	Xipkro	78	15	M	2.57
IP	Externa	3	2	3	01.03.2019	2019	1450.38	XIPKRO-14IP03A2-12III19	Xiphopenaeus kroyeri	Xipkro	77	20	M	3
IP	Externa	3	2	3	01.03.2019	2019	1450.38	XIPKRO-15IP03A2-12III19	Xiphopenaeus kroyeri	Xipkro	83	12	M	3.85
IP	Externa	3	2	3	01.03.2019	2019	1450.38	XIPKRO-16IP03A2-12III19	Xiphopenaeus kroyeri	Xipkro	72	18	F	3.37
IP	Externa	3	2	3	01.03.2019	2019	1450.38	XIPKRO-17IP03A2-12III19	Xiphopenaeus kroyeri	Xipkro	76	18	F	3.2
IP	Externa	3	2	3	01.03.2019	2019	1450.38	XIPKRO-18IP03A2-12III19	Xiphopenaeus kroyeri	Xipkro	77	13	M	2.89
IP	Externa	3	2	3	01.03.2019	2019	1450.38	XIPKRO-19IP03A2-12III19	Xiphopenaeus kroyeri	Xipkro	48	11	F	1.65
IP	Externa	3	3	3	01.03.2019	2019	1347.88	XIPKRO-01IP03A3-12III19	Xiphopenaeus kroyeri	Xipkro	100	23	F	3.1
IP	Externa	3	3	3	01.03.2019	2019	1347.88	XIPKRO-02IP03A3-12III19	Xiphopenaeus kroyeri	Xipkro	84	16	M	3.1
IP	Externa	3	3	3	01.03.2019	2019	1347.88	XIPKRO-03IP03A3-12III19	Xiphopenaeus kroyeri	Xipkro	107	24	F	7.81
IP	Externa	3	3	3	01.03.2019	2019	1347.88	XIPKRO-04IP03A3-12III19	Xiphopenaeus kroyeri	Xipkro	76	19	F	4.72
IP	Externa	3	3	3	01.03.2019	2019	1347.88	XIPKRO-05IP03A3-12III19	Xiphopenaeus kroyeri	Xipkro	96	20	F	4.78
IP	Externa	3	3	3	01.03.2019	2019	1347.88	XIPKRO-06IP03A3-12III19	Xiphopenaeus kroyeri	Xipkro	95	18	M	4.75
IP	Externa	3	3	3	01.03.2019	2019	1347.88	XIPKRO-07IP03A3-12III19	Xiphopenaeus kroyeri	Xipkro	91	18	M	4.65
IP	Externa	3	3	3	01.03.2019	2019	1347.88	XIPKRO-08IP03A3-12III19	Xiphopenaeus kroyeri	Xipkro	85	17	M	3.44
IP	Externa	3	3	3	01.03.2019	2019	1347.88	XIPKRO-09IP03A3-12III19	Xiphopenaeus kroyeri	Xipkro	88	18	F	3.74
IP	Externa	3	3	3	01.03.2019	2019	1347.88	XIPKRO-10IP03A3-12III19	Xiphopenaeus kroyeri	Xipkro	58	13	M	1.51
IP	Externa	3	3	3	01.03.2019	2019	1347.88	XIPKRO-11IP03A3-12III19	Xiphopenaeus kroyeri	Xipkro	73	17	M	3.83
IP	Externa	3	3	3	01.03.2019	2019	1347.88	XIPKRO-12IP03A3-12III19	Xiphopenaeus kroyeri	Xipkro	70	14	M	1.58
IP	Externa	3	3	3	01.03.2019	2019	1347.88	XIPKRO-13IP03A3-12III19	Xiphopenaeus kroyeri	Xipkro	81	18	F	3.26
IP	Externa	3	3	3	01.03.2019	2019	1347.88	XIPKRO-14IP03A3-12III19	Xiphopenaeus kroyeri	Xipkro	89	17	M	4.1
IP	Externa	3	3	3	01.03.2019	2019	1347.88	XIPKRO-15IP03A3-12III19	Xiphopenaeus kroyeri	Xipkro	85	15	M	3.62
IP	Externa	3	3	3	01.03.2019	2019	1347.88	XIPKRO-16IP03A3-12III19	Xiphopenaeus kroyeri	Xipkro	63	13	F	2.08
IP	Externa	3	3	3	01.03.2019	2019	1347.88	XIPKRO-17IP03A3-12III19	Xiphopenaeus kroyeri	Xipkro	92	18	F	4.9
IP	Externa	3	3	3	01.03.2019	2019	1347.88	XIPKRO-18IP03A3-12III19	Xiphopenaeus kroyeri	Xipkro	110	24	F	7.81
IP	Externa	3	3	3	01.03.2019	2019	1347.88	XIPKRO-19IP03A3-12III19	Xiphopenaeus kroyeri	Xipkro	94	20	M	4.72
IP	Externa	3	3	3	01.03.2019	2019	1347.88	XIPKRO-20IP03A3-12III19	Xiphopenaeus kroyeri	Xipkro	90	20	F	4.96
IP	Externa	3	3	3	01.03.2019	2019	1347.88	XIPKRO-21IP03A3-12III19	Xiphopenaeus kroyeri	Xipkro	82	16	M	3.37
IP	Externa	3	3	3	01.03.2019	2019	1347.88	XIPKRO-22IP03A3-12III19	Xiphopenaeus kroyeri	Xipkro	79	17	F	3.7
IP	Externa	3	3	3	01.03.2019	2019	1347.88	XIPKRO-23IP03A3-12III19	Xiphopenaeus kroyeri	Xipkro	93	20	F	4.32
IP	Externa	3	3	3	01.03.2019	2019	1347.88	XIPKRO-24IP03A3-12III19	Xiphopenaeus kroyeri	Xipkro	92	16	M	4.39
IP	Externa	3	3	3	01.03.2019	2019	1347.88	XIPKRO-25IP03A3-12III19	Xiphopenaeus kroyeri	Xipkro	66	12	M	1.65
IP	Externa	3	3	3	01.03.2019	2019	1347.88	XIPKRO-26IP03A3-12III19	Xiphopenaeus kroyeri	Xipkro	77	15	M	2.45
IP	Externa	3	3	3	01.03.2019	2019	1347.88	XIPKRO-27IP03A3-12III19	Xiphopenaeus kroyeri	Xipkro	71	14	M	2.18
IP	Externa	3	3	3	01.03.2019	2019	1347.88	XIPKRO-28IP03A3-12III19	Xiphopenaeus kroyeri	Xipkro	87	17	F	3.56
IP	Externa	3	3	3	01.03.2019	2019	1347.88	XIPKRO-29IP03A3-12III19	Xiphopenaeus kroyeri	Xipkro	56	11	F	1.13
IP	Externa	3	3	3	01.03.2019	2019	1347.88	XIPKRO-30IP03A3-12III19	Xiphopenaeus kroyeri	Xipkro	53	11	F	0.92
IP	Externa	3	3	3	01.03.2019	2019	1347.88	XIPKRO-31IP03A3-12III19	Xiphopenaeus kroyeri	Xipkro	42	10	F	0.76
IP	Externa	3	3	3	01.03.2019	2019	1347.88	XIPKRO-32IP03A3-12III19	Xiphopenaeus kroyeri	Xipkro	60	16	M	2.15
IP	Externa	3	3	3	01.03.2019	2019	1347.88	XIPKRO-33IP03A3-12III19	Xiphopenaeus kroyeri	Xipkro	44	12	F	0.58
IP	Externa	3	3	3	01.03.2019	2019	1347.88	XIPKRO-34IP03A3-12III19	Xiphopenaeus kroyeri	Xipkro	69	16	M	2.56
IP	Externa	3	3	3	01.03.2019	2019	1347.88	XIPKRO-35IP03A3-12III19	Xiphopenaeus kroyeri	Xipkro	57	13	F	1.49
RD	Externa	3	1	3	01.03.2019	2019	1414.5	XIPKRO-01RD03A1-15III19	Xiphopenaeus kroyeri	Xipkro	99	25	M	9.34
RD	Externa	3	1	3	01.03.2019	2019	1414.5	XIPKRO-02RD03A1-15III19	Xiphopenaeus kroyeri	Xipkro	66	15	M	3.01
RD	Externa	3	1	3	01.03.2019	2019	1414.5	XIPKRO-03RD03A1-15III19	Xiphopenaeus kroyeri	Xipkro	81	20	F	6.01
RD	Externa	3	1	3	01.03.2019	2019	1414.5	XIPKRO-04RD03A1-15III19	Xiphopenaeus kroyeri	Xipkro	112	30	F	14.37
RD	Externa	3	1	3	01.03.2019	2019	1414.5	XIPKRO-05RD03A1-15III19	Xiphopenaeus kroyeri	Xipkro	88	20	F	5.52
RD	Externa	3	1	3	01.03.2019	2019	1414.5	XIPKRO-06RD03A1-15III19	Xiphopenaeus kroyeri	Xipkro	91	20	F	9.1
RD	Externa	3	1	3	01.03.2019	2019	1414.5	XIPKRO-07RD03A1-15III19	Xiphopenaeus kroyeri	Xipkro	94	21	F	9.97
RD	Externa	3	1	3	01.03.2019	2019	1414.5	XIPKRO-08RD03A1-15III19	Xiphopenaeus kroyeri	Xipkro	75	14	M	5.92
RD	Externa	3	1	3	01.03.2019	2019	1414.5	XIPKRO-09RD03A1-15III19	Xiphopenaeus kroyeri	Xipkro	76	15	F	4.73
RD	Externa	3	1	3	01.03.2019	2019	1414.5	XIPKRO-10RD03A1-15III19	Xiphopenaeus kroyeri	Xipkro	83	16	F	6.1
RD	Externa	3	1	3	01.03.2019	2019	1414.5	XIPKRO-11RD03A1-15III19	Xiphopenaeus kroyeri	Xipkro	62	12	M	3.45
RD	Externa	3	1	3	01.03.2019	2019	1414.5	XIPKRO-12RD03A1-15III19	Xiphopenaeus kroyeri	Xipkro	72	13	M	4.36
RD	Externa	3	1	3	01.03.2019	2019	1414.5	XIPKRO-13RD03A1-15III19	Xiphopenaeus kroyeri	Xipkro	79	14	F	5.34
RD	Externa	3	1	3	01.03.2019	2019	1414.5	XIPKRO-14RD03A1-15III19	Xiphopenaeus kroyeri	Xipkro	78	16	F	4.34
RD	Externa	3	1	3	01.03.2019	2019	1414.5	XIPKRO-15RD03A1-15III19	Xiphopenaeus kroyeri	Xipkro	72	13	M	4.31
RD	Externa	3	1	3	01.03.2019	2019	1414.5	XIPKRO-16RD03A1-15III19	Xiphopenaeus kroyeri	Xipkro	84	17	F	5.83
RD	Externa	3	1	3	01.03.2019	2019	1414.5	XIPKRO-17RD03A1-15III19	Xiphopenaeus kroyeri	Xipkro	67	11	M	3.45
RD	Externa	3	1	3	01.03.2019	2019	1414.5	XIPKRO-18RD03A1-15III19	Xiphopenaeus kroyeri	Xipkro	79	13	M	5.2
RD	Externa	3	1	3	01.03.2019	2019	1414.5	XIPKRO-19RD03A1-15III19	Xiphopenaeus kroyeri	Xipkro	75	13	M	4.39
RD	Externa	3	1	3	01.03.2019	2019	1414.5	XIPKRO-20RD03A1-15III19	Xiphopenaeus kroyeri	Xipkro	66	12	M	2.96
RD	Externa	3	1	3	01.03.2019	2019	1414.5	XIPKRO-21RD03A1-15III19	Xiphopenaeus kroyeri	Xipkro	63	9	F	2.47
RD	Externa	3	1	3	01.03.2019	2019	1414.5	XIPKRO-22RD03A1-15III19	Xiphopenaeus kroyeri	Xipkro	90	18	F	7.32
RD	Externa	3	1	3	01.03.2019	2019	1414.5	XIPKRO-23RD03A1-15III19	Xiphopenaeus kroyeri	Xipkro	77	13	M	5.03
RD	Externa	3	1	3	01.03.2019	2019	1414.5	XIPKRO-24RD03A1-15III19	Xiphopenaeus kroyeri	Xipkro	78	12	F	4.55
RD	Externa	3	1	3	01.03.2019	2019	1414.5	XIPKRO-25RD03A1-15III19	Xiphopenaeus kroyeri	Xipkro	76	13	M	3.73
RD	Externa	3	1	3	01.03.2019	2019	1414.5	XIPKRO-26RD03A1-15III19	Xiphopenaeus kroyeri	Xipkro	76	14	M	4.65
RD	Externa	3	1	3	01.03.2019	2019	1414.5	XIPKRO-27RD03A1-15III19	Xiphopenaeus kroyeri	Xipkro	104	23	F	10.35
RD	Externa	3	1	3	01.03.2019	2019	1414.5	XIPKRO-28RD03A1-15III19	Xiphopenaeus kroyeri	Xipkro	79	14	F	5.36
RD	Externa	3	1	3	01.03.2019	2019	1414.5	XIPKRO-29RD03A1-15III19	Xiphopenaeus kroyeri	Xipkro	65	10	F	2.75
RD	Externa	3	1	3	01.03.2019	2019	1414.5	XIPKRO-30RD03A1-15III19	Xiphopenaeus kroyeri	Xipkro	67	11	M	2.75
RD	Externa	3	1	3	01.03.2019	2019	1414.5		Xiphopenaeus kroyeri	Xipkro				610.1
RD	Externa	3	1	3	01.03.2019	2019	1414.5	XIPKRO-137RD03A1-15III19	Xiphopenaeus kroyeri	Xipkro	107	25	F	6.62
RD	Externa	3	1	3	01.03.2019	2019	1414.5	XIPKRO-138RD03A1-15III19	Xiphopenaeus kroyeri	Xipkro	102	24	F	6.44
RD	Externa	3	1	3	01.03.2019	2019	1414.5	XIPKRO-139RD03A1-15III19	Xiphopenaeus kroyeri	Xipkro	88	20	M	3.71
RD	Externa	3	1	3	01.03.2019	2019	1414.5	XIPKRO-140RD03A1-15III19	Xiphopenaeus kroyeri	Xipkro	99	22	M	5.53
RD	Externa	3	1	3	01.03.2019	2019	1414.5	XIPKRO-141RD03A1-15III19	Xiphopenaeus kroyeri	Xipkro	113	30	F	9
RD	Externa	3	1	3	01.03.2019	2019	1414.5	XIPKRO-142RD03A1-15III19	Xiphopenaeus kroyeri	Xipkro	104	24	F	8.37
RD	Externa	3	1	3	01.03.2019	2019	1414.5	XIPKRO-143RD03A1-15III19	Xiphopenaeus kroyeri	Xipkro	105	30	F	8.55
RD	Externa	3	1	3	01.03.2019	2019	1414.5	XIPKRO-144RD03A1-15III19	Xiphopenaeus kroyeri	Xipkro	92	24	F	6.22
RD	Externa	3	1	3	01.03.2019	2019	1414.5	XIPKRO-145RD03A1-15III19	Xiphopenaeus kroyeri	Xipkro	94	25	M	5.49
RD	Externa	3	1	3	01.03.2019	2019	1414.5	XIPKRO-146RD03A1-15III19	Xiphopenaeus kroyeri	Xipkro	96	26	F	5.74
RD	Externa	3	1	3	01.03.2019	2019	1414.5	XIPKRO-147RD03A1-15III19	Xiphopenaeus kroyeri	Xipkro	84	23	M	5.5
RD	Externa	3	1	3	01.03.2019	2019	1414.5	XIPKRO-148RD03A1-15III19	Xiphopenaeus kroyeri	Xipkro	92	24	F	4.89
RD	Externa	3	1	3	01.03.2019	2019	1414.5	XIPKRO-149RD03A1-15III19	Xiphopenaeus kroyeri	Xipkro	92	25	F	4.99
RD	Externa	3	1	3	01.03.2019	2019	1414.5	XIPKRO-150RD03A1-15III19	Xiphopenaeus kroyeri	Xipkro	110	30	F	8.7
RD	Externa	3	1	3	01.03.2019	2019	1414.5	XIPKRO-151RD03A1-15III19	Xiphopenaeus kroyeri	Xipkro	111	30	F	8.37
RD	Externa	3	1	3	01.03.2019	2019	1414.5	XIPKRO-152RD03A1-15III19	Xiphopenaeus kroyeri	Xipkro	93	25	F	4.98
RD	Externa	3	1	3	01.03.2019	2019	1414.5	XIPKRO-153RD03A1-15III19	Xiphopenaeus kroyeri	Xipkro	78	23	M	4.82
RD	Externa	3	1	3	01.03.2019	2019	1414.5	XIPKRO-154RD03A1-15III19	Xiphopenaeus kroyeri	Xipkro	91	24	F	7.22
RD	Externa	3	1	3	01.03.2019	2019	1414.5	XIPKRO-155RD03A1-15III19	Xiphopenaeus kroyeri	Xipkro	91	22	F	4.85
RD	Externa	3	2	3	01.03.2019	2019	1240.25	XIPKRO-01RD03A2-15III19	Xiphopenaeus kroyeri	Xipkro	117	28	F	8.88
RD	Externa	3	3	3	01.03.2019	2019	2434.38	XIPKRO-01RD03A3-15III19	Xiphopenaeus kroyeri	Xipkro	87	20	M	3.68
RD	Externa	3	3	3	01.03.2019	2019	2434.38	XIPKRO-02RD03A3-15III19	Xiphopenaeus kroyeri	Xipkro	98	25	F	5.47
RD	Externa	3	3	3	01.03.2019	2019	2434.38	XIPKRO-03RD03A3-15III19	Xiphopenaeus kroyeri	Xipkro	85	21	F	3.35
RD	Externa	3	3	3	01.03.2019	2019	2434.38	XIPKRO-04RD03A3-15III19	Xiphopenaeus kroyeri	Xipkro	90	21	F	5.04
RD	Externa	3	3	3	01.03.2019	2019	2434.38	XIPKRO-05RD03A3-15III19	Xiphopenaeus kroyeri	Xipkro	95	24	M	6.75
RD	Externa	3	3	3	01.03.2019	2019	2434.38	XIPKRO-06RD03A3-15III19	Xiphopenaeus kroyeri	Xipkro	100	23	M	6.7
RD	Externa	3	3	3	01.03.2019	2019	2434.38	XIPKRO-07RD03A3-15III19	Xiphopenaeus kroyeri	Xipkro	90	24	F	5.83
RD	Externa	3	3	3	01.03.2019	2019	2434.38	XIPKRO-08RD03A3-15III19	Xiphopenaeus kroyeri	Xipkro	99	28	F	8.65
RD	Externa	3	3	3	01.03.2019	2019	2434.38	XIPKRO-09RD03A3-15III19	Xiphopenaeus kroyeri	Xipkro	82	25	F	6.48
RD	Externa	3	3	3	01.03.2019	2019	2434.38	XIPKRO-10RD03A3-15III19	Xiphopenaeus kroyeri	Xipkro	88	24	F	6.08
RD	Externa	3	3	3	01.03.2019	2019	2434.38	XIPKRO-11RD03A3-15III19	Xiphopenaeus kroyeri	Xipkro	88	18	M	4.54
RD	Externa	3	3	3	01.03.2019	2019	2434.38	XIPKRO-12RD03A3-15III19	Xiphopenaeus kroyeri	Xipkro	106	25	F	12.89
RD	Externa	3	3	3	01.03.2019	2019	2434.38	XIPKRO-13RD03A3-15III19	Xiphopenaeus kroyeri	Xipkro	89	20	M	5.2
RD	Externa	3	3	3	01.03.2019	2019	2434.38	XIPKRO-14RD03A3-15III19	Xiphopenaeus kroyeri	Xipkro	90	21	F	5.7
RD	Externa	3	3	3	01.03.2019	2019	2434.38	XIPKRO-15RD03A3-15III19	Xiphopenaeus kroyeri	Xipkro	88	24	F	5.25
RD	Externa	3	3	3	01.03.2019	2019	2434.38	XIPKRO-16RD03A3-15III19	Xiphopenaeus kroyeri	Xipkro	90	17	M	4.23
RD	Externa	3	3	3	01.03.2019	2019	2434.38	XIPKRO-17RD03A3-15III19	Xiphopenaeus kroyeri	Xipkro	87	17	F	4.04
RD	Externa	3	3	3	01.03.2019	2019	2434.38	XIPKRO-18RD03A3-15III19	Xiphopenaeus kroyeri	Xipkro	90	19	F	5.2
RD	Externa	3	3	3	01.03.2019	2019	2434.38	XIPKRO-19RD03A3-15III19	Xiphopenaeus kroyeri	Xipkro	87	20	M	3.93
RD	Externa	3	3	3	01.03.2019	2019	2434.38	XIPKRO-20RD03A3-15III19	Xiphopenaeus kroyeri	Xipkro	84	16	F	4.49
RD	Externa	3	3	3	01.03.2019	2019	2434.38	XIPKRO-21RD03A3-15III19	Xiphopenaeus kroyeri	Xipkro	84	17	M	4.05
RD	Externa	3	3	3	01.03.2019	2019	2434.38	XIPKRO-22RD03A3-15III19	Xiphopenaeus kroyeri	Xipkro	96	26	M	7.39
RD	Externa	3	3	3	01.03.2019	2019	2434.38	XIPKRO-23RD03A3-15III19	Xiphopenaeus kroyeri	Xipkro	84	19	M	3.92
RD	Externa	3	3	3	01.03.2019	2019	2434.38	XIPKRO-24RD03A3-15III19	Xiphopenaeus kroyeri	Xipkro	78	17	M	3.12
RD	Externa	3	3	3	01.03.2019	2019	2434.38	XIPKRO-25RD03A3-15III19	Xiphopenaeus kroyeri	Xipkro	92	20	M	4.35
RD	Externa	3	3	3	01.03.2019	2019	2434.38	XIPKRO-26RD03A3-15III19	Xiphopenaeus kroyeri	Xipkro	107	30	F	12.22
RD	Externa	3	3	3	01.03.2019	2019	2434.38	XIPKRO-27RD03A3-15III19	Xiphopenaeus kroyeri	Xipkro	81	22	F	4.14
RD	Externa	3	3	3	01.03.2019	2019	2434.38	XIPKRO-28RD03A3-15III19	Xiphopenaeus kroyeri	Xipkro	95	21	F	5.5
RD	Externa	3	3	3	01.03.2019	2019	2434.38	XIPKRO-29RD03A3-15III19	Xiphopenaeus kroyeri	Xipkro	95	25	F	6.62
RD	Externa	3	3	3	01.03.2019	2019	2434.38	XIPKRO-30RD03A3-15III19	Xiphopenaeus kroyeri	Xipkro	84	22	M	4.91
RD	Externa	3	3	3	01.03.2019	2019	2434.38	XIPKRO-31RD03A3-15III19	Xiphopenaeus kroyeri	Xipkro	89	21	M	4.9
RD	Externa	3	3	3	01.03.2019	2019	2434.38	XIPKRO-32RD03A3-15III19	Xiphopenaeus kroyeri	Xipkro	90	22	M	5.1
SM	Externa	3	1	3	01.03.2019	2019	1030.12	XIPKRO-01SM03A1-15III19	Xiphopenaeus kroyeri	Xipkro	79	22	F	3.02
SM	Externa	3	1	3	01.03.2019	2019	1030.12	XIPKRO-02SM03A1-15III19	Xiphopenaeus kroyeri	Xipkro	78	23	M	3.09
SM	Externa	3	1	3	01.03.2019	2019	1030.12	XIPKRO-03SM03A1-15III19	Xiphopenaeus kroyeri	Xipkro	74	27	F	3.84
SM	Externa	3	1	3	01.03.2019	2019	1030.12	XIPKRO-04SM03A1-15III19	Xiphopenaeus kroyeri	Xipkro	75	22	M	2.51
SM	Externa	3	1	3	01.03.2019	2019	1030.12	XIPKRO-05SM03A1-15III19	Xiphopenaeus kroyeri	Xipkro	80	24	M	3.1
SM	Externa	3	1	3	01.03.2019	2019	1030.12	XIPKRO-06SM03A1-15III19	Xiphopenaeus kroyeri	Xipkro	47	16	M	1.22
SM	Externa	3	1	3	01.03.2019	2019	1030.12	XIPKRO-07SM03A1-15III19	Xiphopenaeus kroyeri	Xipkro	71	23	F	2.38
SM	Externa	3	1	3	01.03.2019	2019	1030.12	XIPKRO-08SM03A1-15III19	Xiphopenaeus kroyeri	Xipkro	70	22	F	2.54
SM	Externa	3	1	3	01.03.2019	2019	1030.12	XIPKRO-09SM03A1-15III19	Xiphopenaeus kroyeri	Xipkro	66	20	M	2.2
SM	Externa	3	1	3	01.03.2019	2019	1030.12	XIPKRO-10SM03A1-15III19	Xiphopenaeus kroyeri	Xipkro	59	21	M	1.83
SM	Externa	3	1	3	01.03.2019	2019	1030.12	XIPKRO-11SM03A1-15III19	Xiphopenaeus kroyeri	Xipkro	77	20	F	2.82
SM	Externa	3	1	3	01.03.2019	2019	1030.12	XIPKRO-12SM03A1-15III19	Xiphopenaeus kroyeri	Xipkro	78	26	F	3.07
SM	Externa	3	1	3	01.03.2019	2019	1030.12	XIPKRO-13SM03A1-15III19	Xiphopenaeus kroyeri	Xipkro	67	20	F	2.35
SM	Externa	3	1	3	01.03.2019	2019	1030.12	XIPKRO-14SM03A1-15III19	Xiphopenaeus kroyeri	Xipkro	75	22	M	3.27
SM	Externa	3	1	3	01.03.2019	2019	1030.12	XIPKRO-15SM03A1-15III19	Xiphopenaeus kroyeri	Xipkro	70	20	F	2.06
SM	Externa	3	1	3	01.03.2019	2019	1030.12	XIPKRO-16SM03A1-15III19	Xiphopenaeus kroyeri	Xipkro	62	20	F	1.6
SM	Externa	3	1	3	01.03.2019	2019	1030.12	XIPKRO-17SM03A1-15III19	Xiphopenaeus kroyeri	Xipkro	54	15	F	0.89
SM	Externa	3	1	3	01.03.2019	2019	1030.12	XIPKRO-18SM03A1-15III19	Xiphopenaeus kroyeri	Xipkro	57	15	F	0.95
SM	Externa	3	1	3	01.03.2019	2019	1030.12	XIPKRO-19SM03A1-15III19	Xiphopenaeus kroyeri	Xipkro	59	18	F	1.75
SM	Externa	3	1	3	01.03.2019	2019	1030.12	XIPKRO-20SM03A1-15III19	Xiphopenaeus kroyeri	Xipkro	62	22	F	2.65
SM	Externa	3	1	3	01.03.2019	2019	1030.12	XIPKRO-21SM03A1-15III19	Xiphopenaeus kroyeri	Xipkro	48	18	M	1.12
SM	Externa	3	1	3	01.03.2019	2019	1030.12	XIPKRO-22SM03A1-15III19	Xiphopenaeus kroyeri	Xipkro	47	12	F	0.84
SM	Externa	3	1	3	01.03.2019	2019	1030.12	XIPKRO-23SM03A1-15III19	Xiphopenaeus kroyeri	Xipkro	79	23	M	2.8
SM	Externa	3	1	3	01.03.2019	2019	1030.12	XIPKRO-24SM03A1-15III19	Xiphopenaeus kroyeri	Xipkro	72	22	M	2.59
SM	Externa	3	1	3	01.03.2019	2019	1030.12	XIPKRO-25SM03A1-15III19	Xiphopenaeus kroyeri	Xipkro	71	22	F	2.64
SM	Externa	3	1	3	01.03.2019	2019	1030.12		Xiphopenaeus kroyeri	Xipkro				71.46
CV	Externa	3	1	4	01.04.2019	2019	1117.25	XIPKRO-01CA03A1-14IV19	Xiphopenaeus kroyeri	Xipkro	57	19	F	3.46
CV	Externa	3	1	4	01.04.2019	2019	1117.25	XIPKRO-02CA03A1-14IV19	Xiphopenaeus kroyeri	Xipkro	52	22	M	1.3
CV	Externa	3	1	4	01.04.2019	2019	1117.25	XIPKRO-03CA03A1-14IV19	Xiphopenaeus kroyeri	Xipkro	56	24	F	1.05
CV	Externa	3	1	4	01.04.2019	2019	1117.25	XIPKRO-04CA03A1-14IV19	Xiphopenaeus kroyeri	Xipkro	45	20	M	1.11
CV	Externa	3	1	4	01.04.2019	2019	1117.25	XIPKRO-05CA03A1-14IV19	Xiphopenaeus kroyeri	Xipkro	67	24	F	4.73
CV	Externa	3	1	4	01.04.2019	2019	1117.25	XIPKRO-06CA03A1-14IV19	Xiphopenaeus kroyeri	Xipkro	52	21	F	1.35
CV	Externa	3	1	4	01.04.2019	2019	1117.25	XIPKRO-07CA03A1-14IV19	Xiphopenaeus kroyeri	Xipkro	46	16	M	1.13
CV	Externa	3	1	4	01.04.2019	2019	1117.25	XIPKRO-08CA03A1-14IV19	Xiphopenaeus kroyeri	Xipkro	58	19	M	2.01
CV	Externa	3	1	4	01.04.2019	2019	1117.25	XIPKRO-09CA03A1-14IV19	Xiphopenaeus kroyeri	Xipkro	49	14	F	1.1
CV	Externa	3	1	4	01.04.2019	2019	1117.25	XIPKRO-10CA03A1-14IV19	Xiphopenaeus kroyeri	Xipkro	55	19	F	1.9
CV	Externa	3	1	4	01.04.2019	2019	1117.25	XIPKRO-11CA03A1-14IV19	Xiphopenaeus kroyeri	Xipkro	52	15	M	1.29
CV	Externa	3	1	4	01.04.2019	2019	1117.25	XIPKRO-12CA03A1-14IV19	Xiphopenaeus kroyeri	Xipkro	77	24	F	4.6
CV	Externa	3	1	4	01.04.2019	2019	1117.25	XIPKRO-13CA03A1-14IV19	Xiphopenaeus kroyeri	Xipkro	60	20	M	1.17
CV	Externa	3	1	4	01.04.2019	2019	1117.25	XIPKRO-14CA03A1-14IV19	Xiphopenaeus kroyeri	Xipkro	66	26	M	4.02
CV	Externa	3	1	4	01.04.2019	2019	1117.25	XIPKRO-15CA03A1-14IV19	Xiphopenaeus kroyeri	Xipkro	47	15	F	0.77
CV	Externa	3	1	4	01.04.2019	2019	1117.25	XIPKRO-16CA03A1-14IV19	Xiphopenaeus kroyeri	Xipkro	49	20	F	1.87
CV	Externa	3	1	4	01.04.2019	2019	1117.25	XIPKRO-17CA03A1-14IV19	Xiphopenaeus kroyeri	Xipkro	71	26	F	4.64
CV	Externa	3	1	4	01.04.2019	2019	1117.25	XIPKRO-18CA03A1-14IV19	Xiphopenaeus kroyeri	Xipkro	53	20	F	1.83
CV	Externa	3	2	4	01.04.2019	2019	1076.25	XIPKRO-01CA03A2-14IV19	Xiphopenaeus kroyeri	Xipkro	87	34	F	5.3
CV	Externa	3	2	4	01.04.2019	2019	1076.25	XIPKRO-02CA03A2-14IV19	Xiphopenaeus kroyeri	Xipkro	70	16	M	3.14
CV	Externa	3	2	4	01.04.2019	2019	1076.25	XIPKRO-03CA03A2-14IV19	Xiphopenaeus kroyeri	Xipkro	67	12	F	3.14
CV	Externa	3	2	4	01.04.2019	2019	1076.25	XIPKRO-04CA03A2-14IV19	Xiphopenaeus kroyeri	Xipkro	47	8	F	0.75
CV	Externa	3	2	4	01.04.2019	2019	1076.25	XIPKRO-05CA03A2-14IV19	Xiphopenaeus kroyeri	Xipkro	52	10	F	0.96
CV	Externa	3	2	4	01.04.2019	2019	1076.25	XIPKRO-06CA03A2-14IV19	Xiphopenaeus kroyeri	Xipkro	70	14	M	2.1
CV	Externa	3	2	4	01.04.2019	2019	1076.25	XIPKRO-07CA03A2-14IV19	Xiphopenaeus kroyeri	Xipkro	68	15	F	1.78
CV	Externa	3	3	4	01.04.2019	2019	1271	XIPKRO-01CA03A3-14IV19	Xiphopenaeus kroyeri	Xipkro	56	19	M	2.02
CV	Externa	3	3	4	01.04.2019	2019	1271	XIPKRO-02CA03A3-14IV19	Xiphopenaeus kroyeri	Xipkro	49	14	M	1.17
CV	Externa	3	3	4	01.04.2019	2019	1271	XIPKRO-03CA03A3-14IV19	Xiphopenaeus kroyeri	Xipkro	54	15	M	1.54
CV	Externa	3	3	4	01.04.2019	2019	1271	XIPKRO-04CA03A3-14IV19	Xiphopenaeus kroyeri	Xipkro	57	11	F	1.15
CV	Externa	3	3	4	01.04.2019	2019	1271	XIPKRO-05CA03A3-14IV19	Xiphopenaeus kroyeri	Xipkro	61	14	M	2.14
CV	Externa	3	3	4	01.04.2019	2019	1271	XIPKRO-06CA03A3-14IV19	Xiphopenaeus kroyeri	Xipkro	55	10	F	1.01
CV	Externa	3	3	4	01.04.2019	2019	1271	XIPKRO-07CA03A3-14IV19	Xiphopenaeus kroyeri	Xipkro	49	11	M	1.32
CV	Externa	3	3	4	01.04.2019	2019	1271	XIPKRO-08CA03A3-14IV19	Xiphopenaeus kroyeri	Xipkro	57	12	F	1.24
CV	Externa	3	3	4	01.04.2019	2019	1271	XIPKRO-09CA03A3-14IV19	Xiphopenaeus kroyeri	Xipkro	52	14	F	2.15
CV	Externa	3	3	4	01.04.2019	2019	1271	XIPKRO-10CA03A3-14IV19	Xiphopenaeus kroyeri	Xipkro	54	12	F	1.15
CV	Externa	3	3	4	01.04.2019	2019	1271	XIPKRO-11CA03A3-14IV19	Xiphopenaeus kroyeri	Xipkro	55	11	M	1.55
CV	Externa	3	3	4	01.04.2019	2019	1271	XIPKRO-12CA03A3-14IV19	Xiphopenaeus kroyeri	Xipkro	60	14	M	1.55
CV	Externa	3	3	4	01.04.2019	2019	1271	XIPKRO-13CA03A3-14IV19	Xiphopenaeus kroyeri	Xipkro	66	15	F	2.2
CV	Externa	4	1	4	01.04.2019	2019	850.75	XIPKRO-01CA04A1-14IV19	Xiphopenaeus kroyeri	Xipkro	79	16	M	2.6
CV	Externa	4	1	4	01.04.2019	2019	850.75	XIPKRO-02CA04A1-14IV19	Xiphopenaeus kroyeri	Xipkro	74	13	M	2.11
CV	Externa	4	1	4	01.04.2019	2019	850.75	XIPKRO-03CA04A1-14IV19	Xiphopenaeus kroyeri	Xipkro	81	19	M	3.63
CV	Externa	4	1	4	01.04.2019	2019	850.75	XIPKRO-04CA04A1-14IV19	Xiphopenaeus kroyeri	Xipkro	80	12	F	1.29
CV	Externa	4	1	4	01.04.2019	2019	850.75	XIPKRO-05CA04A1-14IV19	Xiphopenaeus kroyeri	Xipkro	56	15	F	1.42
CV	Externa	4	1	4	01.04.2019	2019	850.75	XIPKRO-06CA04A1-14IV19	Xiphopenaeus kroyeri	Xipkro	65	12	M	1.58
CV	Externa	4	1	4	01.04.2019	2019	850.75	XIPKRO-07CA04A1-14IV19	Xiphopenaeus kroyeri	Xipkro	83	17	F	2.85
CV	Externa	4	1	4	01.04.2019	2019	850.75	XIPKRO-08CA04A1-14IV19	Xiphopenaeus kroyeri	Xipkro	85	17	M	3.25
CV	Externa	4	1	4	01.04.2019	2019	850.75	XIPKRO-09CA04A1-14IV19	Xiphopenaeus kroyeri	Xipkro	25	15	M	3.45
CV	Externa	4	1	4	01.04.2019	2019	850.75	XIPKRO-10CA04A1-14IV19	Xiphopenaeus kroyeri	Xipkro	80	18	M	3.32
CV	Externa	4	1	4	01.04.2019	2019	850.75	XIPKRO-11CA04A1-14IV19	Xiphopenaeus kroyeri	Xipkro	63	12	F	1.34
CV	Externa	4	1	4	01.04.2019	2019	850.75	XIPKRO-12CA04A1-14IV19	Xiphopenaeus kroyeri	Xipkro	93	16	M	5.04
CV	Externa	4	1	4	01.04.2019	2019	850.75	XIPKRO-13CA04A1-14IV19	Xiphopenaeus kroyeri	Xipkro	111	21	F	9.35
CV	Externa	4	1	4	01.04.2019	2019	850.75	XIPKRO-14CA04A1-14IV19	Xiphopenaeus kroyeri	Xipkro	71	16	M	2.37
CV	Externa	4	1	4	01.04.2019	2019	850.75	XIPKRO-15CA04A1-14IV19	Xiphopenaeus kroyeri	Xipkro	79	14	M	2.85
CV	Externa	4	1	4	01.04.2019	2019	850.75	XIPKRO-16CA04A1-14IV19	Xiphopenaeus kroyeri	Xipkro	85	16	M	3.73
CV	Externa	4	1	4	01.04.2019	2019	850.75	XIPKRO-17CA04A1-14IV19	Xiphopenaeus kroyeri	Xipkro	74	17	M	3.09
CV	Externa	4	1	4	01.04.2019	2019	850.75	XIPKRO-18CA04A1-14IV19	Xiphopenaeus kroyeri	Xipkro	75	16	M	2.85
CV	Externa	4	1	4	01.04.2019	2019	850.75	XIPKRO-19CA04A1-14IV19	Xiphopenaeus kroyeri	Xipkro	75	16	F	2.64
CV	Externa	4	1	4	01.04.2019	2019	850.75	XIPKRO-20CA04A1-14IV19	Xiphopenaeus kroyeri	Xipkro	73	14	M	2.2
CV	Externa	4	1	4	01.04.2019	2019	850.75	XIPKRO-21CA04A1-14IV19	Xiphopenaeus kroyeri	Xipkro	62	15	M	1.96
CV	Externa	4	1	4	01.04.2019	2019	850.75	XIPKRO-22CA04A1-14IV19	Xiphopenaeus kroyeri	Xipkro	67	16	M	1.54
CV	Externa	4	1	4	01.04.2019	2019	850.75	XIPKRO-23CA04A1-14IV19	Xiphopenaeus kroyeri	Xipkro	50	9	F	0.71
CV	Externa	4	1	4	01.04.2019	2019	850.75	XIPKRO-24CA04A1-14IV19	Xiphopenaeus kroyeri	Xipkro	81	18	F	3.39
CV	Externa	4	1	4	01.04.2019	2019	850.75	XIPKRO-25CA04A1-14IV19	Xiphopenaeus kroyeri	Xipkro	59	12	F	1.03
CV	Externa	4	1	4	01.04.2019	2019	850.75	XIPKRO-26CA04A1-14IV19	Xiphopenaeus kroyeri	Xipkro	53	10	F	0.83
CV	Externa	4	1	4	01.04.2019	2019	850.75	XIPKRO-27CA04A1-14IV19	Xiphopenaeus kroyeri	Xipkro	53	11	F	0.88
CV	Externa	4	1	4	01.04.2019	2019	850.75	XIPKRO-28CA04A1-14IV19	Xiphopenaeus kroyeri	Xipkro	75	14	M	2.51
CV	Externa	4	1	4	01.04.2019	2019	850.75	XIPKRO-29CA04A1-14IV19	Xiphopenaeus kroyeri	Xipkro	47	12	F	0.63
CV	Externa	4	2	4	01.04.2019	2019	779	XIPKRO-01CA04A2-14IV19	Xiphopenaeus kroyeri	Xipkro	86	20	M	5.24
CV	Externa	4	2	4	01.04.2019	2019	779	XIPKRO-02CA04A2-14IV19	Xiphopenaeus kroyeri	Xipkro	72	15	M	2.84
CV	Externa	4	2	4	01.04.2019	2019	779	XIPKRO-03CA04A2-14IV19	Xiphopenaeus kroyeri	Xipkro	71	16	M	3.1
CV	Externa	4	2	4	01.04.2019	2019	779	XIPKRO-04CA04A2-14IV19	Xiphopenaeus kroyeri	Xipkro	75	17	M	3.88
CV	Externa	4	2	4	01.04.2019	2019	779	XIPKRO-05CA04A2-14IV19	Xiphopenaeus kroyeri	Xipkro	60	11	M	1.89
CV	Externa	4	2	4	01.04.2019	2019	779	XIPKRO-06CA04A2-14IV19	Xiphopenaeus kroyeri	Xipkro	62	17	M	3.44
CV	Externa	4	2	4	01.04.2019	2019	779	XIPKRO-07CA04A2-14IV19	Xiphopenaeus kroyeri	Xipkro	79	15	F	4.8
CV	Externa	4	2	4	01.04.2019	2019	779	XIPKRO-08CA04A2-14IV19	Xiphopenaeus kroyeri	Xipkro	74	14	M	2.66
CV	Externa	4	2	4	01.04.2019	2019	779	XIPKRO-09CA04A2-14IV19	Xiphopenaeus kroyeri	Xipkro	86	16	F	3.87
CV	Externa	4	2	4	01.04.2019	2019	779	XIPKRO-10CA04A2-14IV19	Xiphopenaeus kroyeri	Xipkro	83	15	M	2.45
CV	Externa	4	2	4	01.04.2019	2019	779	XIPKRO-11CA04A2-14IV19	Xiphopenaeus kroyeri	Xipkro	68	12	F	2.22
CV	Externa	4	2	4	01.04.2019	2019	779	XIPKRO-12CA04A2-14IV19	Xiphopenaeus kroyeri	Xipkro	66	13	M	3.16
CV	Externa	4	2	4	01.04.2019	2019	779	XIPKRO-13CA04A2-14IV19	Xiphopenaeus kroyeri	Xipkro	77	17	M	4.46
CV	Externa	4	2	4	01.04.2019	2019	779	XIPKRO-14CA04A2-14IV19	Xiphopenaeus kroyeri	Xipkro	70	12	M	2.16
CV	Externa	4	2	4	01.04.2019	2019	779	XIPKRO-15CA04A2-14IV19	Xiphopenaeus kroyeri	Xipkro	62	14	M	2.42
CV	Externa	4	2	4	01.04.2019	2019	779	XIPKRO-16CA04A2-14IV19	Xiphopenaeus kroyeri	Xipkro	62	13	F	2.56
CV	Externa	4	2	4	01.04.2019	2019	779	XIPKRO-17CA04A2-14IV19	Xiphopenaeus kroyeri	Xipkro	54	13	F	1.57
CV	Externa	4	3	4	01.04.2019	2019	989.125	XIPKRO-01CA04A3-14IV19	Xiphopenaeus kroyeri	Xipkro	79	14	F	3
CV	Externa	4	3	4	01.04.2019	2019	989.125	XIPKRO-02CA04A3-14IV19	Xiphopenaeus kroyeri	Xipkro	56	13	F	1.15
CV	Externa	4	3	4	01.04.2019	2019	989.125	XIPKRO-03CA04A3-14IV19	Xiphopenaeus kroyeri	Xipkro	87	18	M	4.94
CV	Externa	4	3	4	01.04.2019	2019	989.125	XIPKRO-04CA04A3-14IV19	Xiphopenaeus kroyeri	Xipkro	88	16	F	3.9
CV	Externa	4	3	4	01.04.2019	2019	989.125	XIPKRO-05CA04A3-14IV19	Xiphopenaeus kroyeri	Xipkro	87	19	M	4.52
CV	Externa	4	3	4	01.04.2019	2019	989.125	XIPKRO-06CA04A3-14IV19	Xiphopenaeus kroyeri	Xipkro	70	15	M	2.05
CV	Externa	4	3	4	01.04.2019	2019	989.125	XIPKRO-07CA04A3-14IV19	Xiphopenaeus kroyeri	Xipkro	61	13	M	1.24
CV	Externa	4	3	4	01.04.2019	2019	989.125	XIPKRO-08CA04A3-14IV19	Xiphopenaeus kroyeri	Xipkro	91	18	F	6.46
CV	Externa	4	3	4	01.04.2019	2019	989.125	XIPKRO-09CA04A3-14IV19	Xiphopenaeus kroyeri	Xipkro	84	20	M	4.43
CV	Externa	4	3	4	01.04.2019	2019	989.125	XIPKRO-10CA04A3-14IV19	Xiphopenaeus kroyeri	Xipkro	82	19	F	3.52
CV	Externa	4	3	4	01.04.2019	2019	989.125	XIPKRO-11CA04A3-14IV19	Xiphopenaeus kroyeri	Xipkro	67	14	M	2.46
CV	Externa	4	3	4	01.04.2019	2019	989.125	XIPKRO-12CA04A3-14IV19	Xiphopenaeus kroyeri	Xipkro	80	19	M	3.9
CV	Externa	4	3	4	01.04.2019	2019	989.125	XIPKRO-13CA04A3-14IV19	Xiphopenaeus kroyeri	Xipkro	79	18	M	3.77
CV	Externa	4	3	4	01.04.2019	2019	989.125	XIPKRO-14CA04A3-14IV19	Xiphopenaeus kroyeri	Xipkro	67	16	M	2.49
CV	Externa	4	3	4	01.04.2019	2019	989.125	XIPKRO-15CA04A3-14IV19	Xiphopenaeus kroyeri	Xipkro	61	10	F	1.26
CV	Externa	4	3	4	01.04.2019	2019	989.125	XIPKRO-16CA04A3-14IV19	Xiphopenaeus kroyeri	Xipkro	73	20	F	3.27
CV	Externa	4	3	4	01.04.2019	2019	989.125	XIPKRO-17CA04A3-14IV19	Xiphopenaeus kroyeri	Xipkro	73	16	M	2.46
CV	Externa	4	3	4	01.04.2019	2019	989.125	XIPKRO-18CA04A3-14IV19	Xiphopenaeus kroyeri	Xipkro	68	17	M	2.65
CV	Externa	4	3	4	01.04.2019	2019	989.125	XIPKRO-19CA04A3-14IV19	Xiphopenaeus kroyeri	Xipkro	70	16	M	3.21
CV	Externa	4	3	4	01.04.2019	2019	989.125	XIPKRO-20CA04A3-14IV19	Xiphopenaeus kroyeri	Xipkro	74	16	M	3.71
CV	Externa	4	3	4	01.04.2019	2019	989.125	XIPKRO-21CA04A3-14IV19	Xiphopenaeus kroyeri	Xipkro	73	17	M	2.33
CV	Externa	4	3	4	01.04.2019	2019	989.125	XIPKRO-22CA04A3-14IV19	Xiphopenaeus kroyeri	Xipkro	76	12	F	3
CV	Externa	4	3	4	01.04.2019	2019	989.125	XIPKRO-23CA04A3-14IV19	Xiphopenaeus kroyeri	Xipkro	71	15	M	2.65
CV	Externa	4	3	4	01.04.2019	2019	989.125	XIPKRO-24CA04A3-14IV19	Xiphopenaeus kroyeri	Xipkro	68	17	M	2.87
CV	Externa	4	3	4	01.04.2019	2019	989.125	XIPKRO-25CA04A3-14IV19	Xiphopenaeus kroyeri	Xipkro	66	15	M	2.9
CV	Externa	4	3	4	01.04.2019	2019	989.125	XIPKRO-26CA04A3-14IV19	Xiphopenaeus kroyeri	Xipkro	63	15	F	2.33
CV	Externa	4	3	4	01.04.2019	2019	989.125	XIPKRO-27CA04A3-14IV19	Xiphopenaeus kroyeri	Xipkro	70	14	F	2.55
CV	Externa	4	3	4	01.04.2019	2019	989.125	XIPKRO-28CA04A3-14IV19	Xiphopenaeus kroyeri	Xipkro	41	14	M	2.41
CV	Externa	4	3	4	01.04.2019	2019	989.125	XIPKRO-29CA04A3-14IV19	Xiphopenaeus kroyeri	Xipkro	69	13	M	1.7
CV	Externa	4	3	4	01.04.2019	2019	989.125		Xiphopenaeus kroyeri	Xipkro				36.63
CV	Externa	5	1	4	01.04.2019	2019	1096.75	XIPKRO-01CA05A1-14IV19	Xiphopenaeus kroyeri	Xipkro	69	16	F	2.78
CV	Externa	5	1	4	01.04.2019	2019	1096.75	XIPKRO-02CA05A1-14IV19	Xiphopenaeus kroyeri	Xipkro	58	13	M	1.48
CV	Externa	5	1	4	01.04.2019	2019	1096.75	XIPKRO-03CA05A1-14IV19	Xiphopenaeus kroyeri	Xipkro	54	15	F	3.05
CV	Externa	5	1	4	01.04.2019	2019	1096.75	XIPKRO-04CA05A1-14IV19	Xiphopenaeus kroyeri	Xipkro	61	14	M	1.58
CV	Externa	5	1	4	01.04.2019	2019	1096.75	XIPKRO-05CA05A1-14IV19	Xiphopenaeus kroyeri	Xipkro	60	12	M	1.5
CV	Externa	5	1	4	01.04.2019	2019	1096.75	XIPKRO-06CA05A1-14IV19	Xiphopenaeus kroyeri	Xipkro	53	9	F	1.4
CV	Externa	5	1	4	01.04.2019	2019	1096.75	XIPKRO-07CA05A1-14IV19	Xiphopenaeus kroyeri	Xipkro	50	13	M	1.26
CV	Externa	5	1	4	01.04.2019	2019	1096.75	XIPKRO-08CA05A1-14IV19	Xiphopenaeus kroyeri	Xipkro	54	11	M	1.2
CV	Externa	5	1	4	01.04.2019	2019	1096.75	XIPKRO-09CA05A1-14IV19	Xiphopenaeus kroyeri	Xipkro	57	12	M	1.99
CV	Externa	5	1	4	01.04.2019	2019	1096.75	XIPKRO-10CA05A1-14IV19	Xiphopenaeus kroyeri	Xipkro	72	18	F	4.1
CV	Externa	5	1	4	01.04.2019	2019	1096.75	XIPKRO-11CA05A1-14IV19	Xiphopenaeus kroyeri	Xipkro	70	14	F	3.02
CV	Externa	5	1	4	01.04.2019	2019	1096.75	XIPKRO-12CA05A1-14IV19	Xiphopenaeus kroyeri	Xipkro	68	16	F	2.02
CV	Externa	5	2	4	01.04.2019	2019	1107	XIPKRO-30CA05A2-14IV19	Xiphopenaeus kroyeri	Xipkro	57	19	M	1.5
CV	Externa	5	2	4	01.04.2019	2019	1107	XIPKRO-31CA05A2-14IV19	Xiphopenaeus kroyeri	Xipkro	66	21	F	2.46
CV	Externa	5	2	4	01.04.2019	2019	1107	XIPKRO-32CA05A2-14IV19	Xiphopenaeus kroyeri	Xipkro	64	19	F	2.3
CV	Externa	5	2	4	01.04.2019	2019	1107	XIPKRO-33CA05A2-14IV19	Xiphopenaeus kroyeri	Xipkro	65	17	M	1.86
CV	Externa	5	2	4	01.04.2019	2019	1107	XIPKRO-34CA05A2-14IV19	Xiphopenaeus kroyeri	Xipkro	58	21	M	1.67
CV	Externa	5	2	4	01.04.2019	2019	1107	XIPKRO-35CA05A2-14IV19	Xiphopenaeus kroyeri	Xipkro	50	16	F	1.12
CV	Externa	5	3	4	01.04.2019	2019	1158.25	XIPKRO-01CA05A3-14IV19	Xiphopenaeus kroyeri	Xipkro	85	15	M	3.91
CV	Externa	5	3	4	01.04.2019	2019	1158.25	XIPKRO-02CA05A3-14IV19	Xiphopenaeus kroyeri	Xipkro	83	16	M	3.43
CV	Externa	5	3	4	01.04.2019	2019	1158.25	XIPKRO-03CA05A3-14IV19	Xiphopenaeus kroyeri	Xipkro	72	15	M	2.16
CV	Externa	5	3	4	01.04.2019	2019	1158.25	XIPKRO-04CA05A3-14IV19	Xiphopenaeus kroyeri	Xipkro	81	17	M	4.25
CV	Externa	5	3	4	01.04.2019	2019	1158.25	XIPKRO-05CA05A3-14IV19	Xiphopenaeus kroyeri	Xipkro	83	16	M	3.33
CV	Externa	5	3	4	01.04.2019	2019	1158.25	XIPKRO-06CA05A3-14IV19	Xiphopenaeus kroyeri	Xipkro	74	14	M	3.54
CV	Externa	5	3	4	01.04.2019	2019	1158.25	XIPKRO-07CA05A3-14IV19	Xiphopenaeus kroyeri	Xipkro	71	15	M	2.55
CV	Externa	5	3	4	01.04.2019	2019	1158.25	XIPKRO-08CA05A3-14IV19	Xiphopenaeus kroyeri	Xipkro	74	16	M	2.11
CV	Externa	5	3	4	01.04.2019	2019	1158.25	XIPKRO-09CA05A3-14IV19	Xiphopenaeus kroyeri	Xipkro	78	19	M	3.35
CV	Externa	5	3	4	01.04.2019	2019	1158.25	XIPKRO-10CA05A3-14IV19	Xiphopenaeus kroyeri	Xipkro	59	13	M	1.35
CV	Externa	5	3	4	01.04.2019	2019	1158.25	XIPKRO-11CA05A3-14IV19	Xiphopenaeus kroyeri	Xipkro	86	19	M	4.48
CV	Externa	5	3	4	01.04.2019	2019	1158.25	XIPKRO-12CA05A3-14IV19	Xiphopenaeus kroyeri	Xipkro	79	17	M	3.67
CV	Externa	5	3	4	01.04.2019	2019	1158.25	XIPKRO-13CA05A3-14IV19	Xiphopenaeus kroyeri	Xipkro	91	18	M	4.02
CV	Externa	5	3	4	01.04.2019	2019	1158.25	XIPKRO-14CA05A3-14IV19	Xiphopenaeus kroyeri	Xipkro	58	14	F	1.27
CV	Externa	5	3	4	01.04.2019	2019	1158.25	XIPKRO-15CA05A3-14IV19	Xiphopenaeus kroyeri	Xipkro	77	15	M	3.32
CV	Externa	5	3	4	01.04.2019	2019	1158.25	XIPKRO-16CA05A3-14IV19	Xiphopenaeus kroyeri	Xipkro	70	15	F	2.29
CV	Externa	5	3	4	01.04.2019	2019	1158.25	XIPKRO-17CA05A3-14IV19	Xiphopenaeus kroyeri	Xipkro	55	11	F	1.28
CV	Externa	5	3	4	01.04.2019	2019	1158.25	XIPKRO-18CA05A3-14IV19	Xiphopenaeus kroyeri	Xipkro	53	10	M	1.11
CV	Externa	5	3	4	01.04.2019	2019	1158.25	XIPKRO-19CA05A3-14IV19	Xiphopenaeus kroyeri	Xipkro	93	17	M	4.77
CV	Externa	5	3	4	01.04.2019	2019	1158.25	XIPKRO-20CA05A3-14IV19	Xiphopenaeus kroyeri	Xipkro	75	14	M	2.75
CV	Externa	5	3	4	01.04.2019	2019	1158.25	XIPKRO-21CA05A3-14IV19	Xiphopenaeus kroyeri	Xipkro	50	9	M	0.99
CV	Externa	5	3	4	01.04.2019	2019	1158.25	XIPKRO-22CA05A3-14IV19	Xiphopenaeus kroyeri	Xipkro	85	15	M	3.35
CV	Externa	5	3	4	01.04.2019	2019	1158.25	XIPKRO-23CA05A3-14IV19	Xiphopenaeus kroyeri	Xipkro	86	15	M	4.87
CV	Externa	5	3	4	01.04.2019	2019	1158.25	XIPKRO-24CA05A3-14IV19	Xiphopenaeus kroyeri	Xipkro	72	15	F	2.58
CV	Externa	5	3	4	01.04.2019	2019	1158.25	XIPKRO-25CA05A3-14IV19	Xiphopenaeus kroyeri	Xipkro	49	10	M	0.92
CV	Externa	5	3	4	01.04.2019	2019	1158.25	XIPKRO-26CA05A3-14IV19	Xiphopenaeus kroyeri	Xipkro	98	21	F	6.57
CV	Externa	5	3	4	01.04.2019	2019	1158.25	XIPKRO-27CA05A3-14IV19	Xiphopenaeus kroyeri	Xipkro	74	15	F	3.76
CV	Externa	5	3	4	01.04.2019	2019	1158.25	XIPKRO-28CA05A3-14IV19	Xiphopenaeus kroyeri	Xipkro	45	10	F	0.75
CV	Externa	6	1	4	01.04.2019	2019	1296.62	XIPKRO-01CA06A1-14IV19	Xiphopenaeus kroyeri	Xipkro	65	20	M	3.68
CV	Externa	6	1	4	01.04.2019	2019	1296.62	XIPKRO-02CA06A1-14IV19	Xiphopenaeus kroyeri	Xipkro	68	20	M	2.38
CV	Externa	6	1	4	01.04.2019	2019	1296.62	XIPKRO-03CA06A1-14IV19	Xiphopenaeus kroyeri	Xipkro	56	20	M	3.06
CV	Externa	6	1	4	01.04.2019	2019	1296.62	XIPKRO-04CA06A1-14IV19	Xiphopenaeus kroyeri	Xipkro	54	16	F	2.63
CV	Externa	6	1	4	01.04.2019	2019	1296.62	XIPKRO-05CA06A1-14IV19	Xiphopenaeus kroyeri	Xipkro	60	16	M	2.8
CV	Externa	6	1	4	01.04.2019	2019	1296.62	XIPKRO-06CA06A1-14IV19	Xiphopenaeus kroyeri	Xipkro	55	15	M	3.44
CV	Externa	6	1	4	01.04.2019	2019	1296.62	XIPKRO-07CA06A1-14IV19	Xiphopenaeus kroyeri	Xipkro	48	15	F	2.01
CV	Externa	6	1	4	01.04.2019	2019	1296.62	XIPKRO-08CA06A1-14IV19	Xiphopenaeus kroyeri	Xipkro	50	16	M	3.42
CV	Externa	6	1	4	01.04.2019	2019	1296.62	XIPKRO-09CA06A1-14IV19	Xiphopenaeus kroyeri	Xipkro	55	15	F	3.78
CV	Externa	6	1	4	01.04.2019	2019	1296.62	XIPKRO-10CA06A1-14IV19	Xiphopenaeus kroyeri	Xipkro	55	17	M	3.23
CV	Externa	6	1	4	01.04.2019	2019	1296.62	XIPKRO-11CA06A1-14IV19	Xiphopenaeus kroyeri	Xipkro	55	20	M	3.25
CV	Externa	6	1	4	01.04.2019	2019	1296.62	XIPKRO-12CA06A1-14IV19	Xiphopenaeus kroyeri	Xipkro	52	13	M	2.72
CV	Externa	6	1	4	01.04.2019	2019	1296.62	XIPKRO-13CA06A1-14IV19	Xiphopenaeus kroyeri	Xipkro	54	12	F	2.8
CV	Externa	6	1	4	01.04.2019	2019	1296.62	XIPKRO-14CA06A1-14IV19	Xiphopenaeus kroyeri	Xipkro	55	15	M	3.2
CV	Externa	6	1	4	01.04.2019	2019	1296.62	XIPKRO-15CA06A1-14IV19	Xiphopenaeus kroyeri	Xipkro	50	11	M	2.5
CV	Externa	6	1	4	01.04.2019	2019	1296.62	XIPKRO-16CA06A1-14IV19	Xiphopenaeus kroyeri	Xipkro	49	15	M	2.53
CV	Externa	6	1	4	01.04.2019	2019	1296.62	XIPKRO-17CA06A1-14IV19	Xiphopenaeus kroyeri	Xipkro	40	14	F	1.5
CV	Externa	6	1	4	01.04.2019	2019	1296.62	XIPKRO-18CA06A1-14IV19	Xiphopenaeus kroyeri	Xipkro	45	10	M	2.07
CV	Externa	6	1	4	01.04.2019	2019	1296.62	XIPKRO-19CA06A1-14IV19	Xiphopenaeus kroyeri	Xipkro	50	15	M	3.2
CV	Externa	6	1	4	01.04.2019	2019	1296.62	XIPKRO-20CA06A1-14IV19	Xiphopenaeus kroyeri	Xipkro	50	15	M	2.55
CV	Externa	6	2	4	01.04.2019	2019	1317.12	XIPKRO-01CA06A2-14IV19	Xiphopenaeus kroyeri	Xipkro	86	20	M	3.3
CV	Externa	6	2	4	01.04.2019	2019	1317.12	XIPKRO-02CA06A2-14IV19	Xiphopenaeus kroyeri	Xipkro	73	15	M	2.42
CV	Externa	6	2	4	01.04.2019	2019	1317.12	XIPKRO-03CA06A2-14IV19	Xiphopenaeus kroyeri	Xipkro	58	13	F	1.19
CV	Externa	6	2	4	01.04.2019	2019	1317.12	XIPKRO-04CA06A2-14IV19	Xiphopenaeus kroyeri	Xipkro	64	14	M	2.2
CV	Externa	6	2	4	01.04.2019	2019	1317.12	XIPKRO-05CA06A2-14IV19	Xiphopenaeus kroyeri	Xipkro	68	15	M	1.76
CV	Externa	6	2	4	01.04.2019	2019	1317.12	XIPKRO-06CA06A2-14IV19	Xiphopenaeus kroyeri	Xipkro	85	18	M	4.29
CV	Externa	6	2	4	01.04.2019	2019	1317.12	XIPKRO-07CA06A2-14IV19	Xiphopenaeus kroyeri	Xipkro	88	18	M	4.51
CV	Externa	6	2	4	01.04.2019	2019	1317.12	XIPKRO-08CA06A2-14IV19	Xiphopenaeus kroyeri	Xipkro	89	19	M	4.5
CV	Externa	6	2	4	01.04.2019	2019	1317.12	XIPKRO-09CA06A2-14IV19	Xiphopenaeus kroyeri	Xipkro	72	17	M	2.8
CV	Externa	6	2	4	01.04.2019	2019	1317.12	XIPKRO-10CA06A2-14IV19	Xiphopenaeus kroyeri	Xipkro	77	16	M	2.54
CV	Externa	6	2	4	01.04.2019	2019	1317.12	XIPKRO-11CA06A2-14IV19	Xiphopenaeus kroyeri	Xipkro	82	18	M	3.34
CV	Externa	6	2	4	01.04.2019	2019	1317.12	XIPKRO-12CA06A2-14IV19	Xiphopenaeus kroyeri	Xipkro	81	18	M	2.94
CV	Externa	6	2	4	01.04.2019	2019	1317.12	XIPKRO-13CA06A2-14IV19	Xiphopenaeus kroyeri	Xipkro	75	17	M	2.66
CV	Externa	6	2	4	01.04.2019	2019	1317.12	XIPKRO-14CA06A2-14IV19	Xiphopenaeus kroyeri	Xipkro	75	19	F	3.39
CV	Externa	6	2	4	01.04.2019	2019	1317.12	XIPKRO-15CA06A2-14IV19	Xiphopenaeus kroyeri	Xipkro	76	17	M	2.63
CV	Externa	6	2	4	01.04.2019	2019	1317.12	XIPKRO-16CA06A2-14IV19	Xiphopenaeus kroyeri	Xipkro	85	17	M	3.76
CV	Externa	6	2	4	01.04.2019	2019	1317.12	XIPKRO-17CA06A2-14IV19	Xiphopenaeus kroyeri	Xipkro	70	15	F	3.08
CV	Externa	6	2	4	01.04.2019	2019	1317.12	XIPKRO-18CA06A2-14IV19	Xiphopenaeus kroyeri	Xipkro	75	18	F	2.37
CV	Externa	6	2	4	01.04.2019	2019	1317.12	XIPKRO-19CA06A2-14IV19	Xiphopenaeus kroyeri	Xipkro	70	16	F	2.12
CV	Externa	6	2	4	01.04.2019	2019	1317.12	XIPKRO-20CA06A2-14IV19	Xiphopenaeus kroyeri	Xipkro	75	16	M	2.51
CV	Externa	6	2	4	01.04.2019	2019	1317.12	XIPKRO-21CA06A2-14IV19	Xiphopenaeus kroyeri	Xipkro	68	14	M	2.06
CV	Externa	6	2	4	01.04.2019	2019	1317.12	XIPKRO-22CA06A2-14IV19	Xiphopenaeus kroyeri	Xipkro	61	13	F	1.34
CV	Externa	6	2	4	01.04.2019	2019	1317.12	XIPKRO-23CA06A2-14IV19	Xiphopenaeus kroyeri	Xipkro	74	14	M	2.02
CV	Externa	6	2	4	01.04.2019	2019	1317.12	XIPKRO-24CA06A2-14IV19	Xiphopenaeus kroyeri	Xipkro	59	15	F	1.39
CV	Externa	6	2	4	01.04.2019	2019	1317.12	XIPKRO-25CA06A2-14IV19	Xiphopenaeus kroyeri	Xipkro	57	11	F	1.24
CV	Externa	6	2	4	01.04.2019	2019	1317.12	XIPKRO-26CA06A2-14IV19	Xiphopenaeus kroyeri	Xipkro	73	17	F	2.58
CV	Externa	6	2	4	01.04.2019	2019	1317.12	XIPKRO-27CA06A2-14IV19	Xiphopenaeus kroyeri	Xipkro	64	12	M	1.55
CV	Externa	6	2	4	01.04.2019	2019	1317.12	XIPKRO-28CA06A2-14IV19	Xiphopenaeus kroyeri	Xipkro	76	16	F	2.62
CV	Externa	6	2	4	01.04.2019	2019	1317.12	XIPKRO-29CA06A2-14IV19	Xiphopenaeus kroyeri	Xipkro	47	9	F	0.7
CV	Externa	6	2	4	01.04.2019	2019	1317.12	XIPKRO-30CA06A2-14IV19	Xiphopenaeus kroyeri	Xipkro	66	15	M	1.81
CV	Externa	6	2	4	01.04.2019	2019	1317.12		Xiphopenaeus kroyeri	Xipkro				87.45
CV	Externa	6	3	4	01.04.2019	2019	1286.38	XIPKRO-01CA06A3-14IV19	Xiphopenaeus kroyeri	Xipkro	66	17	M	3.12
CV	Externa	6	3	4	01.04.2019	2019	1286.38	XIPKRO-02CA06A3-14IV19	Xiphopenaeus kroyeri	Xipkro	74	20	M	5.98
CV	Externa	6	3	4	01.04.2019	2019	1286.38	XIPKRO-03CA06A3-14IV19	Xiphopenaeus kroyeri	Xipkro	50	14	F	1.49
CV	Externa	6	3	4	01.04.2019	2019	1286.38	XIPKRO-04CA06A3-14IV19	Xiphopenaeus kroyeri	Xipkro	54	15	F	1.71
CV	Externa	6	3	4	01.04.2019	2019	1286.38	XIPKRO-05CA06A3-14IV19	Xiphopenaeus kroyeri	Xipkro	58	14	F	1.44
CV	Externa	6	3	4	01.04.2019	2019	1286.38	XIPKRO-06CA06A3-14IV19	Xiphopenaeus kroyeri	Xipkro	70	17	M	2.9
CV	Externa	6	3	4	01.04.2019	2019	1286.38	XIPKRO-07CA06A3-14IV19	Xiphopenaeus kroyeri	Xipkro	74	16	M	3.49
CV	Externa	6	3	4	01.04.2019	2019	1286.38	XIPKRO-08CA06A3-14IV19	Xiphopenaeus kroyeri	Xipkro	80	20	F	5.77
CV	Externa	6	3	4	01.04.2019	2019	1286.38	XIPKRO-09CA06A3-14IV19	Xiphopenaeus kroyeri	Xipkro	67	15	F	2.37
CV	Externa	6	3	4	01.04.2019	2019	1286.38	XIPKRO-10CA06A3-14IV19	Xiphopenaeus kroyeri	Xipkro	70	16	F	2.86
CV	Externa	6	3	4	01.04.2019	2019	1286.38	XIPKRO-11CA06A3-14IV19	Xiphopenaeus kroyeri	Xipkro	66	14	M	2.82
CV	Externa	6	3	4	01.04.2019	2019	1286.38	XIPKRO-12CA06A3-14IV19	Xiphopenaeus kroyeri	Xipkro	65	14	M	2.86
CV	Externa	6	3	4	01.04.2019	2019	1286.38	XIPKRO-13CA06A3-14IV19	Xiphopenaeus kroyeri	Xipkro	70	15	M	4.53
CV	Externa	6	3	4	01.04.2019	2019	1286.38	XIPKRO-14CA06A3-14IV19	Xiphopenaeus kroyeri	Xipkro	71	20	M	3.86
CV	Externa	6	3	4	01.04.2019	2019	1286.38	XIPKRO-15CA06A3-14IV19	Xiphopenaeus kroyeri	Xipkro	61	15	M	2.65
CV	Externa	6	3	4	01.04.2019	2019	1286.38	XIPKRO-16CA06A3-14IV19	Xiphopenaeus kroyeri	Xipkro	60	14	F	1.91
CV	Externa	6	3	4	01.04.2019	2019	1286.38	XIPKRO-17CA06A3-14IV19	Xiphopenaeus kroyeri	Xipkro	65	15	M	2.76
CV	Externa	6	3	4	01.04.2019	2019	1286.38	XIPKRO-18CA06A3-14IV19	Xiphopenaeus kroyeri	Xipkro	45	10	F	0.75
CV	Externa	6	3	4	01.04.2019	2019	1286.38	XIPKRO-19CA06A3-14IV19	Xiphopenaeus kroyeri	Xipkro	65	20	F	3.1
CV	Externa	6	3	4	01.04.2019	2019	1286.38	XIPKRO-20CA06A3-14IV19	Xiphopenaeus kroyeri	Xipkro	62	20	M	1.78
CV	Externa	6	3	4	01.04.2019	2019	1286.38	XIPKRO-21CA06A3-14IV19	Xiphopenaeus kroyeri	Xipkro	54	16	M	11.2
CV	Externa	6	3	4	01.04.2019	2019	1286.38	XIPKRO-22CA06A3-14IV19	Xiphopenaeus kroyeri	Xipkro	65	14	M	2.1
CV	Externa	6	3	4	01.04.2019	2019	1286.38	XIPKRO-23CA06A3-14IV19	Xiphopenaeus kroyeri	Xipkro	56	15	M	1.56
CV	Externa	6	3	4	01.04.2019	2019	1286.38	XIPKRO-24CA06A3-14IV19	Xiphopenaeus kroyeri	Xipkro	65	13	M	1.8
CV	Externa	6	3	4	01.04.2019	2019	1286.38	XIPKRO-25CA06A3-14IV19	Xiphopenaeus kroyeri	Xipkro	70	17	M	2.4
CV	Externa	6	3	4	01.04.2019	2019	1286.38	XIPKRO-26CA06A3-14IV19	Xiphopenaeus kroyeri	Xipkro	78	15	M	2.33
CV	Externa	6	3	4	01.04.2019	2019	1286.38	XIPKRO-27CA06A3-14IV19	Xiphopenaeus kroyeri	Xipkro	69	16	M	2.83
CV	Externa	6	3	4	01.04.2019	2019	1286.38	XIPKRO-28CA06A3-14IV19	Xiphopenaeus kroyeri	Xipkro	71	16	M	2.21
CV	Externa	6	3	4	01.04.2019	2019	1286.38	XIPKRO-29CA06A3-14IV19	Xiphopenaeus kroyeri	Xipkro	76	17	M	2.06
CV	Externa	6	3	4	01.04.2019	2019	1286.38	XIPKRO-30CA06A3-14IV19	Xiphopenaeus kroyeri	Xipkro	60	16	M	2.7
CV	Externa	6	3	4	01.04.2019	2019	1286.38	XIPKRO-31CA06A3-14IV19	Xiphopenaeus kroyeri	Xipkro	70	21	M	2.66
IP	Interna	1	3	4	01.04.2019	2019	1465.75	XIPKRO-01IP01A3-14IV19	Xiphopenaeus kroyeri	Xipkro	107	23	F	7.29
IP	Interna	1	3	4	01.04.2019	2019	1465.75	XIPKRO-02IP01A3-14IV19	Xiphopenaeus kroyeri	Xipkro	78	15	M	2.63
IP	Interna	1	3	4	01.04.2019	2019	1465.75	XIPKRO-03IP01A3-14IV19	Xiphopenaeus kroyeri	Xipkro	71	14	F	1.99
IP	Interna	1	3	4	01.04.2019	2019	1465.75	XIPKRO-04IP01A3-14IV19	Xiphopenaeus kroyeri	Xipkro	75	12	F	2.18
IP	Interna	1	3	4	01.04.2019	2019	1465.75	XIPKRO-05IP01A3-14IV19	Xiphopenaeus kroyeri	Xipkro	82	14	M	2.93
IP	Interna	1	3	4	01.04.2019	2019	1465.75	XIPKRO-06IP01A3-14IV19	Xiphopenaeus kroyeri	Xipkro	102	21	F	6.03
IP	Interna	1	3	4	01.04.2019	2019	1465.75	XIPKRO-07IP01A3-14IV19	Xiphopenaeus kroyeri	Xipkro	81	17	M	4.41
IP	Interna	1	3	4	01.04.2019	2019	1465.75	XIPKRO-08IP01A3-14IV19	Xiphopenaeus kroyeri	Xipkro	107	22	M	2.29
IP	Interna	1	3	4	01.04.2019	2019	1465.75	XIPKRO-09IP01A3-14IV19	Xiphopenaeus kroyeri	Xipkro	76	13	M	2.29
IP	Interna	1	3	4	01.04.2019	2019	1465.75	XIPKRO-10IP01A3-14IV19	Xiphopenaeus kroyeri	Xipkro	86	17	M	3.76
IP	Externa	3	1	4	01.04.2019	2019	1394	XIPKRO-01IP03A1-13IV19	Xiphopenaeus kroyeri	Xipkro	105	21	M	4.84
IP	Externa	3	1	4	01.04.2019	2019	1394	XIPKRO-02IP03A1-13IV19	Xiphopenaeus kroyeri	Xipkro	65	16	F	1
IP	Externa	3	1	4	01.04.2019	2019	1394	XIPKRO-03IP03A1-13IV19	Xiphopenaeus kroyeri	Xipkro	105	22	M	6.87
IP	Externa	3	1	4	01.04.2019	2019	1394	XIPKRO-04IP03A1-13IV19	Xiphopenaeus kroyeri	Xipkro	110	25	M	5.81
IP	Externa	3	1	4	01.04.2019	2019	1394	XIPKRO-05IP03A1-13IV19	Xiphopenaeus kroyeri	Xipkro	96	26	M	6.25
IP	Externa	3	1	4	01.04.2019	2019	1394	XIPKRO-06IP03A1-13IV19	Xiphopenaeus kroyeri	Xipkro	76	28	F	6.95
IP	Externa	3	1	4	01.04.2019	2019	1394	XIPKRO-07IP03A1-13IV19	Xiphopenaeus kroyeri	Xipkro	110	27	M	7.69
IP	Externa	3	1	4	01.04.2019	2019	1394	XIPKRO-08IP03A1-13IV19	Xiphopenaeus kroyeri	Xipkro	120	33	F	10.03
IP	Externa	3	1	4	01.04.2019	2019	1394	XIPKRO-09IP03A1-13IV19	Xiphopenaeus kroyeri	Xipkro	74	19	F	1.98
IP	Externa	3	1	4	01.04.2019	2019	1394	XIPKRO-10IP03A1-13IV19	Xiphopenaeus kroyeri	Xipkro	39	11	F	0.4
IP	Externa	3	1	4	01.04.2019	2019	1394	XIPKRO-11IP03A1-13IV19	Xiphopenaeus kroyeri	Xipkro	55	8	F	0.76
IP	Externa	3	1	4	01.04.2019	2019	1394	XIPKRO-12IP03A1-13IV19	Xiphopenaeus kroyeri	Xipkro	69	6	F	1.35
IP	Externa	3	1	4	01.04.2019	2019	1394	XIPKRO-13IP03A1-13IV19	Xiphopenaeus kroyeri	Xipkro	53	13	F	0.69
IP	Externa	3	1	4	01.04.2019	2019	1394	XIPKRO-14IP03A1-13IV19	Xiphopenaeus kroyeri	Xipkro	63	12	M	1.41
IP	Externa	3	1	4	01.04.2019	2019	1394	XIPKRO-15IP03A1-13IV19	Xiphopenaeus kroyeri	Xipkro	78	28	M	2.34
IP	Externa	3	1	4	01.04.2019	2019	1394	XIPKRO-16IP03A1-13IV19	Xiphopenaeus kroyeri	Xipkro	61	16	F	1.3
IP	Externa	3	1	4	01.04.2019	2019	1394	XIPKRO-17IP03A1-13IV19	Xiphopenaeus kroyeri	Xipkro	68	18	F	1.83
IP	Externa	3	1	4	01.04.2019	2019	1394	XIPKRO-18IP03A1-13IV19	Xiphopenaeus kroyeri	Xipkro	58	14	F	1
IP	Externa	3	2	4	01.04.2019	2019	1327.38	XIPKRO-01IP03A2-13IV19	Xiphopenaeus kroyeri	Xipkro	93	27	M	5.39
IP	Externa	3	2	4	01.04.2019	2019	1327.38	XIPKRO-02IP03A2-13IV19	Xiphopenaeus kroyeri	Xipkro	85	25	F	3.91
IP	Externa	3	2	4	01.04.2019	2019	1327.38	XIPKRO-03IP03A2-13IV19	Xiphopenaeus kroyeri	Xipkro	66	16	F	0.83
IP	Externa	3	2	4	01.04.2019	2019	1327.38	XIPKRO-04IP03A2-13IV19	Xiphopenaeus kroyeri	Xipkro	56	16	F	1.25
IP	Externa	3	2	4	01.04.2019	2019	1327.38	XIPKRO-05IP03A2-13IV19	Xiphopenaeus kroyeri	Xipkro	71	19	M	2.12
IP	Externa	3	2	4	01.04.2019	2019	1327.38	XIPKRO-06IP03A2-13IV19	Xiphopenaeus kroyeri	Xipkro	75	35	M	2.03
IP	Externa	3	2	4	01.04.2019	2019	1327.38	XIPKRO-07IP03A2-13IV19	Xiphopenaeus kroyeri	Xipkro	86	41	M	3.3
IP	Externa	3	2	4	01.04.2019	2019	1327.38	XIPKRO-08IP03A2-13IV19	Xiphopenaeus kroyeri	Xipkro	116	57	F	7.66
IP	Externa	3	2	4	01.04.2019	2019	1327.38	XIPKRO-09IP03A2-13IV19	Xiphopenaeus kroyeri	Xipkro	104	48	M	5.21
IP	Externa	3	2	4	01.04.2019	2019	1327.38	XIPKRO-10IP03A2-13IV19	Xiphopenaeus kroyeri	Xipkro	101	45	M	5.49
IP	Externa	3	2	4	01.04.2019	2019	1327.38	XIPKRO-11IP03A2-13IV19	Xiphopenaeus kroyeri	Xipkro	101	48	M	6.16
IP	Externa	3	2	4	01.04.2019	2019	1327.38	XIPKRO-12IP03A2-13IV19	Xiphopenaeus kroyeri	Xipkro	104	48	M	3.17
IP	Externa	3	2	4	01.04.2019	2019	1327.38	XIPKRO-13IP03A2-13IV19	Xiphopenaeus kroyeri	Xipkro	104	46	M	5.46
IP	Externa	3	2	4	01.04.2019	2019	1327.38	XIPKRO-14IP03A2-13IV19	Xiphopenaeus kroyeri	Xipkro	105	50	M	7.1
IP	Externa	3	2	4	01.04.2019	2019	1327.38	XIPKRO-15IP03A2-13IV19	Xiphopenaeus kroyeri	Xipkro	107	48	M	7
IP	Externa	3	2	4	01.04.2019	2019	1327.38	XIPKRO-16IP03A2-13IV19	Xiphopenaeus kroyeri	Xipkro	76	36	M	2.28
IP	Externa	3	3	4	01.04.2019	2019	1373.5	XIPKRO-01IP03A3-13IV19	Xiphopenaeus kroyeri	Xipkro	78	16	M	2.91
IP	Externa	4	1	4	01.04.2019	2019	1440.12	XIPKRO-01IP04A1-13IV19	Xiphopenaeus kroyeri	Xipkro	114	30	F	7.63
IP	Externa	4	1	4	01.04.2019	2019	1440.12	XIPKRO-02IP04A1-13IV19	Xiphopenaeus kroyeri	Xipkro	104	21	M	5.5
IP	Externa	4	1	4	01.04.2019	2019	1440.12	XIPKRO-03IP04A1-13IV19	Xiphopenaeus kroyeri	Xipkro	91	23	M	3.77
IP	Externa	4	1	4	01.04.2019	2019	1440.12	XIPKRO-04IP04A1-13IV19	Xiphopenaeus kroyeri	Xipkro	50	12	F	0.68
IP	Externa	4	2	4	01.04.2019	2019	1435		Xiphopenaeus kroyeri	Xipkro				92.34
IP	Externa	4	2	4	01.04.2019	2019	1435	XIPKRO-38IP04A2-13IV19	Xiphopenaeus kroyeri	Xipkro	108	25	F	8.24
IP	Externa	4	2	4	01.04.2019	2019	1435	XIPKRO-39IP04A2-13IV19	Xiphopenaeus kroyeri	Xipkro	86	20	F	4.29
IP	Externa	4	2	4	01.04.2019	2019	1435	XIPKRO-40IP04A2-13IV19	Xiphopenaeus kroyeri	Xipkro	54	14	F	1.23
IP	Externa	4	2	4	01.04.2019	2019	1435	XIPKRO-41IP04A2-13IV19	Xiphopenaeus kroyeri	Xipkro	90	20	M	6.43
IP	Externa	4	2	4	01.04.2019	2019	1435	XIPKRO-42IP04A2-13IV19	Xiphopenaeus kroyeri	Xipkro	83	20	F	4.92
IP	Externa	4	2	4	01.04.2019	2019	1435	XIPKRO-43IP04A2-13IV19	Xiphopenaeus kroyeri	Xipkro	98	18	M	4.79
IP	Externa	4	2	4	01.04.2019	2019	1435	XIPKRO-44IP04A2-13IV19	Xiphopenaeus kroyeri	Xipkro	72	14	F	2.94
IP	Externa	4	2	4	01.04.2019	2019	1435	XIPKRO-45IP04A2-13IV19	Xiphopenaeus kroyeri	Xipkro	97	22	M	6.35
IP	Externa	4	2	4	01.04.2019	2019	1435	XIPKRO-46IP04A2-13IV19	Xiphopenaeus kroyeri	Xipkro	90	19	F	4.3
IP	Externa	4	2	4	01.04.2019	2019	1435	XIPKRO-47IP04A2-13IV19	Xiphopenaeus kroyeri	Xipkro	97	21	M	7.29
IP	Externa	4	2	4	01.04.2019	2019	1435	XIPKRO-48IP04A2-13IV19	Xiphopenaeus kroyeri	Xipkro	97	20	F	5.73
IP	Externa	4	2	4	01.04.2019	2019	1435	XIPKRO-49IP04A2-13IV19	Xiphopenaeus kroyeri	Xipkro	94	18	M	6.12
IP	Externa	4	2	4	01.04.2019	2019	1435	XIPKRO-50IP04A2-13IV19	Xiphopenaeus kroyeri	Xipkro	92	20	M	5.89
IP	Externa	4	2	4	01.04.2019	2019	1435	XIPKRO-51IP04A2-13IV19	Xiphopenaeus kroyeri	Xipkro	95	21	M	7.81
IP	Externa	4	2	4	01.04.2019	2019	1435	XIPKRO-52IP04A2-13IV19	Xiphopenaeus kroyeri	Xipkro	77	15	M	3.38
IP	Externa	4	2	4	01.04.2019	2019	1435	XIPKRO-53IP04A2-13IV19	Xiphopenaeus kroyeri	Xipkro	78	18	M	3.78
IP	Externa	4	2	4	01.04.2019	2019	1435	XIPKRO-54IP04A2-13IV19	Xiphopenaeus kroyeri	Xipkro	88	20	F	4.04
IP	Externa	4	2	4	01.04.2019	2019	1435	XIPKRO-55IP04A2-13IV19	Xiphopenaeus kroyeri	Xipkro	68	18	F	2.41
IP	Externa	4	2	4	01.04.2019	2019	1435	XIPKRO-56IP04A2-13IV19	Xiphopenaeus kroyeri	Xipkro	85	20	F	4.6
IP	Externa	4	2	4	01.04.2019	2019	1435	XIPKRO-57IP04A2-13IV19	Xiphopenaeus kroyeri	Xipkro	78	19	F	3.69
IP	Externa	4	2	4	01.04.2019	2019	1435	XIPKRO-58IP04A2-13IV19	Xiphopenaeus kroyeri	Xipkro	96	21	F	6.71
IP	Externa	4	2	4	01.04.2019	2019	1435	XIPKRO-59IP04A2-13IV19	Xiphopenaeus kroyeri	Xipkro	83	18	M	5
IP	Externa	4	2	4	01.04.2019	2019	1435	XIPKRO-60IP04A2-13IV19	Xiphopenaeus kroyeri	Xipkro	85	21	M	4.3
IP	Externa	4	2	4	01.04.2019	2019	1435	XIPKRO-61IP04A2-13IV19	Xiphopenaeus kroyeri	Xipkro	99	20	F	6.43
IP	Externa	4	2	4	01.04.2019	2019	1435	XIPKRO-62IP04A2-13IV19	Xiphopenaeus kroyeri	Xipkro	106	25	F	7.84
IP	Externa	4	2	4	01.04.2019	2019	1435	XIPKRO-63IP04A2-13IV19	Xiphopenaeus kroyeri	Xipkro	98	25	F	8.23
IP	Externa	4	2	4	01.04.2019	2019	1435	XIPKRO-64IP04A2-13IV19	Xiphopenaeus kroyeri	Xipkro	90	21	F	5.84
IP	Externa	4	2	4	01.04.2019	2019	1435	XIPKRO-65IP04A2-13IV19	Xiphopenaeus kroyeri	Xipkro	80	18	F	3.94
IP	Externa	4	2	4	01.04.2019	2019	1435	XIPKRO-66IP04A2-13IV19	Xiphopenaeus kroyeri	Xipkro	64	15	M	1.84
IP	Externa	4	2	4	01.04.2019	2019	1435		Xiphopenaeus kroyeri	Xipkro				48.52
IP	Externa	4	3	4	01.04.2019	2019	1501.62	XIPKRO-01IP04A3-13IV19	Xiphopenaeus kroyeri	Xipkro	87	21	F	3.19
IP	Externa	4	3	4	01.04.2019	2019	1501.62	XIPKRO-02IP04A3-13IV19	Xiphopenaeus kroyeri	Xipkro	105	22	F	6.07
IP	Externa	4	3	4	01.04.2019	2019	1501.62	XIPKRO-03IP04A3-13IV19	Xiphopenaeus kroyeri	Xipkro	57	9	F	0.8
IP	Externa	4	3	4	01.04.2019	2019	1501.62	XIPKRO-04IP04A3-13IV19	Xiphopenaeus kroyeri	Xipkro	45	11	F	0.44
IP	Externa	6	2	4	01.04.2019	2019	1353	XIPKRO-01IP06A2-13IV19	Xiphopenaeus kroyeri	Xipkro	91	18	F	4.21
IP	Externa	6	3	4	01.04.2019	2019	1460.62	XIPKRO-01IP06A3-13IV19	Xiphopenaeus kroyeri	Xipkro	108	22	F	7.13
IP	Externa	6	3	4	01.04.2019	2019	1460.62	XIPKRO-02IP06A3-13IV19	Xiphopenaeus kroyeri	Xipkro	115	25	F	8.89
IP	Externa	6	3	4	01.04.2019	2019	1460.62	XIPKRO-03IP06A3-13IV19	Xiphopenaeus kroyeri	Xipkro	100	22	M	6.59
IP	Externa	6	3	4	01.04.2019	2019	1460.62	XIPKRO-04IP06A3-13IV19	Xiphopenaeus kroyeri	Xipkro	114	26	F	9.2
IP	Externa	6	3	4	01.04.2019	2019	1460.62	XIPKRO-05IP06A3-13IV19	Xiphopenaeus kroyeri	Xipkro	80	17	M	3.47
IP	Externa	6	3	4	01.04.2019	2019	1460.62	XIPKRO-06IP06A3-13IV19	Xiphopenaeus kroyeri	Xipkro	84	17	F	3.49
IP	Externa	6	3	4	01.04.2019	2019	1460.62	XIPKRO-07IP06A3-13IV19	Xiphopenaeus kroyeri	Xipkro	77	15	M	3.01
IP	Externa	6	3	4	01.04.2019	2019	1460.62	XIPKRO-08IP06A3-13IV19	Xiphopenaeus kroyeri	Xipkro	80	16	F	2.9
IP	Externa	6	3	4	01.04.2019	2019	1460.62	XIPKRO-09IP06A3-13IV19	Xiphopenaeus kroyeri	Xipkro	67	12	M	1.94
IP	Externa	6	3	4	01.04.2019	2019	1460.62	XIPKRO-10IP06A3-13IV19	Xiphopenaeus kroyeri	Xipkro	70	15	M	2.41
IP	Externa	6	3	4	01.04.2019	2019	1460.62	XIPKRO-11IP06A3-13IV19	Xiphopenaeus kroyeri	Xipkro	60	13	F	1.28
RD	Externa	3	1	4	01.04.2019	2019	1460.62	XIPKRO-01RD03A1-15IV19	Xiphopenaeus kroyeri	Xipkro	74	17	M	2.05
RD	Externa	3	1	4	01.04.2019	2019	1460.62	XIPKRO-02RD03A1-15IV19	Xiphopenaeus kroyeri	Xipkro	52	12	F	0.91
RD	Externa	3	1	4	01.04.2019	2019	1460.62	XIPKRO-03RD03A1-15IV19	Xiphopenaeus kroyeri	Xipkro	107	25	F	8.42
RD	Externa	3	1	4	01.04.2019	2019	1460.62	XIPKRO-04RD03A1-15IV19	Xiphopenaeus kroyeri	Xipkro	71	14	F	2.13
RD	Externa	3	1	4	01.04.2019	2019	1460.62	XIPKRO-05RD03A1-15IV19	Xiphopenaeus kroyeri	Xipkro	83	17	F	3.39
RD	Externa	3	1	4	01.04.2019	2019	1460.62	XIPKRO-06RD03A1-15IV19	Xiphopenaeus kroyeri	Xipkro	91	25	F	8.18
RD	Externa	3	1	4	01.04.2019	2019	1460.62	XIPKRO-07RD03A1-15IV19	Xiphopenaeus kroyeri	Xipkro	65	15	F	1.83
RD	Externa	3	1	4	01.04.2019	2019	1460.62	XIPKRO-08RD03A1-15IV19	Xiphopenaeus kroyeri	Xipkro	75	15	F	2.03
RD	Externa	3	1	4	01.04.2019	2019	1460.62	XIPKRO-09RD03A1-15IV19	Xiphopenaeus kroyeri	Xipkro	95	22	M	6.39
RD	Externa	3	1	4	01.04.2019	2019	1460.62	XIPKRO-10RD03A1-15IV19	Xiphopenaeus kroyeri	Xipkro	87	19	M	4.13
RD	Externa	3	2	4	01.04.2019	2019	1532.38	XIPKRO-01RD03A2-15IV19	Xiphopenaeus kroyeri	Xipkro	61	15	M	2.15
RD	Externa	3	2	4	01.04.2019	2019	1532.38	XIPKRO-02RD03A2-15IV19	Xiphopenaeus kroyeri	Xipkro	84	20	M	3.3
RD	Externa	3	2	4	01.04.2019	2019	1532.38	XIPKRO-03RD03A2-15IV19	Xiphopenaeus kroyeri	Xipkro	75	18	F	2.82
RD	Externa	3	2	4	01.04.2019	2019	1532.38	XIPKRO-04RD03A2-15IV19	Xiphopenaeus kroyeri	Xipkro	85	17	F	4.17
RD	Externa	3	2	4	01.04.2019	2019	1532.38	XIPKRO-05RD03A2-15IV19	Xiphopenaeus kroyeri	Xipkro	74	15	F	2.37
RD	Externa	3	2	4	01.04.2019	2019	1532.38	XIPKRO-06RD03A2-15IV19	Xiphopenaeus kroyeri	Xipkro	75	16	F	2.37
RD	Externa	3	2	4	01.04.2019	2019	1532.38	XIPKRO-07RD03A2-15IV19	Xiphopenaeus kroyeri	Xipkro	66	20	F	2.02
RD	Externa	3	2	4	01.04.2019	2019	1532.38	XIPKRO-08RD03A2-15IV19	Xiphopenaeus kroyeri	Xipkro	82	11	M	4.85
RD	Externa	3	2	4	01.04.2019	2019	1532.38	XIPKRO-09RD03A2-15IV19	Xiphopenaeus kroyeri	Xipkro	96	20	F	7.17
RD	Externa	3	2	4	01.04.2019	2019	1532.38	XIPKRO-10RD03A2-15IV19	Xiphopenaeus kroyeri	Xipkro	76	25	M	3.01
RD	Externa	3	2	4	01.04.2019	2019	1532.38	XIPKRO-11RD03A2-15IV19	Xiphopenaeus kroyeri	Xipkro	82	15	F	3.36
RD	Externa	3	2	4	01.04.2019	2019	1532.38	XIPKRO-12RD03A2-15IV19	Xiphopenaeus kroyeri	Xipkro	51	19	F	1.2
RD	Externa	3	2	4	01.04.2019	2019	1532.38	XIPKRO-13RD03A2-15IV19	Xiphopenaeus kroyeri	Xipkro	94	20	F	6.03
RD	Externa	3	2	4	01.04.2019	2019	1532.38	XIPKRO-14RD03A2-15IV19	Xiphopenaeus kroyeri	Xipkro	76	15	F	2.67
RD	Externa	3	2	4	01.04.2019	2019	1532.38	XIPKRO-15RD03A2-15IV19	Xiphopenaeus kroyeri	Xipkro	89	23	F	6.02
RD	Externa	3	2	4	01.04.2019	2019	1532.38	XIPKRO-16RD03A2-15IV19	Xiphopenaeus kroyeri	Xipkro	92	22	M	6.85
RD	Externa	3	2	4	01.04.2019	2019	1532.38	XIPKRO-17RD03A2-15IV19	Xiphopenaeus kroyeri	Xipkro	93	21	M	6.43
RD	Externa	3	2	4	01.04.2019	2019	1532.38	XIPKRO-18RD03A2-15IV19	Xiphopenaeus kroyeri	Xipkro	105	25	F	8.42
RD	Externa	3	3	4	01.04.2019	2019	1932.12	XIPKRO-01RD03A3-15IV19	Xiphopenaeus kroyeri	Xipkro	88	20	M	4.64
RD	Externa	3	3	4	01.04.2019	2019	1932.12	XIPKRO-02RD03A3-15IV19	Xiphopenaeus kroyeri	Xipkro	68	16	F	1.74
RD	Externa	3	3	4	01.04.2019	2019	1932.12	XIPKRO-03RD03A3-15IV19	Xiphopenaeus kroyeri	Xipkro	100	22	M	6.15
RD	Externa	3	3	4	01.04.2019	2019	1932.12	XIPKRO-04RD03A3-15IV19	Xiphopenaeus kroyeri	Xipkro	49	9	F	0.65
SM	Externa	3	1	4	01.04.2019	2019	1363.25	XIPKRO-01SM03A1-10IV19	Xiphopenaeus kroyeri	Xipkro	64	12	M	1.54
SM	Externa	3	1	4	01.04.2019	2019	1363.25	XIPKRO-02SM03A1-10IV19	Xiphopenaeus kroyeri	Xipkro	53	10	F	1.5
SM	Externa	3	1	4	01.04.2019	2019	1363.25	XIPKRO-03SM03A1-10IV19	Xiphopenaeus kroyeri	Xipkro	52	12	F	0.87
SM	Externa	3	1	4	01.04.2019	2019	1363.25	XIPKRO-04SM03A1-10IV19	Xiphopenaeus kroyeri	Xipkro	69	15	F	2.05
SM	Externa	3	1	4	01.04.2019	2019	1363.25	XIPKRO-05SM03A1-10IV19	Xiphopenaeus kroyeri	Xipkro	57	12	M	1.15
SM	Externa	3	1	4	01.04.2019	2019	1363.25	XIPKRO-06SM03A1-10IV19	Xiphopenaeus kroyeri	Xipkro	80	17	F	3.75
SM	Externa	3	1	4	01.04.2019	2019	1363.25	XIPKRO-07SM03A1-10IV19	Xiphopenaeus kroyeri	Xipkro	90	19	F	4.45
SM	Externa	3	1	4	01.04.2019	2019	1363.25	XIPKRO-08SM03A1-10IV19	Xiphopenaeus kroyeri	Xipkro	68	14	M	1.53
SM	Externa	3	1	4	01.04.2019	2019	1363.25	XIPKRO-09SM03A1-10IV19	Xiphopenaeus kroyeri	Xipkro	62	14	M	1.1
SM	Externa	3	1	4	01.04.2019	2019	1363.25	XIPKRO-10SM03A1-10IV19	Xiphopenaeus kroyeri	Xipkro	78	15	M	3.04
SM	Externa	3	1	4	01.04.2019	2019	1363.25	XIPKRO-11SM03A1-10IV19	Xiphopenaeus kroyeri	Xipkro	70	15	M	2.48
SM	Externa	3	1	4	01.04.2019	2019	1363.25	XIPKRO-12SM03A1-10IV19	Xiphopenaeus kroyeri	Xipkro	78	18	M	2.03
SM	Externa	3	1	4	01.04.2019	2019	1363.25	XIPKRO-13SM03A1-10IV19	Xiphopenaeus kroyeri	Xipkro	66	14	F	1.75
SM	Externa	3	1	4	01.04.2019	2019	1363.25	XIPKRO-14SM03A1-10IV19	Xiphopenaeus kroyeri	Xipkro	64	10	M	1.7
SM	Externa	3	1	4	01.04.2019	2019	1363.25	XIPKRO-15SM03A1-10IV19	Xiphopenaeus kroyeri	Xipkro	85	20	F	4.83
SM	Externa	3	1	4	01.04.2019	2019	1363.25	XIPKRO-16SM03A1-10IV19	Xiphopenaeus kroyeri	Xipkro	70	17	F	2.95
SM	Externa	3	1	4	01.04.2019	2019	1363.25	XIPKRO-17SM03A1-10IV19	Xiphopenaeus kroyeri	Xipkro	60	13	F	1.26
SM	Externa	3	1	4	01.04.2019	2019	1363.25	XIPKRO-18SM03A1-10IV19	Xiphopenaeus kroyeri	Xipkro	45	9	F	0.51
SM	Externa	3	1	4	01.04.2019	2019	1363.25	XIPKRO-19SM03A1-10IV19	Xiphopenaeus kroyeri	Xipkro	55	9	F	1
SM	Externa	3	1	4	01.04.2019	2019	1363.25	XIPKRO-20SM03A1-10IV19	Xiphopenaeus kroyeri	Xipkro	62	12	M	1.26
SM	Externa	3	1	4	01.04.2019	2019	1363.25	XIPKRO-21SM03A1-10IV19	Xiphopenaeus kroyeri	Xipkro	75	17	F	3.13
SM	Externa	3	1	4	01.04.2019	2019	1363.25	XIPKRO-22SM03A1-10IV19	Xiphopenaeus kroyeri	Xipkro	58	13	F	1.3
SM	Externa	3	1	4	01.04.2019	2019	1363.25	XIPKRO-23SM03A1-10IV19	Xiphopenaeus kroyeri	Xipkro	50	8	F	0.77
SM	Externa	3	1	4	01.04.2019	2019	1363.25	XIPKRO-24SM03A1-10IV19	Xiphopenaeus kroyeri	Xipkro	54	10	F	1.7
SM	Externa	3	1	4	01.04.2019	2019	1363.25	XIPKRO-25SM03A1-10IV19	Xiphopenaeus kroyeri	Xipkro	58	12	F	0.92
SM	Externa	3	1	4	01.04.2019	2019	1363.25	XIPKRO-26SM03A1-10IV19	Xiphopenaeus kroyeri	Xipkro	52	12	F	0.95
SM	Externa	3	1	4	01.04.2019	2019	1363.25	XIPKRO-27SM03A1-10IV19	Xiphopenaeus kroyeri	Xipkro	46	12	F	0.85
SM	Externa	3	1	4	01.04.2019	2019	1363.25	XIPKRO-28SM03A1-10IV19	Xiphopenaeus kroyeri	Xipkro	52	9	F	0.86
SM	Externa	3	1	4	01.04.2019	2019	1363.25	XIPKRO-29SM03A1-10IV19	Xiphopenaeus kroyeri	Xipkro	48	10	F	0.71
SM	Externa	3	1	4	01.04.2019	2019	1363.25	XIPKRO-30SM03A1-10IV19	Xiphopenaeus kroyeri	Xipkro	40	10	F	0.51
SM	Externa	3	1	4	01.04.2019	2019	1363.25		Xiphopenaeus kroyeri	Xipkro				552.41
SM	Externa	3	1	4	01.04.2019	2019	1363.25	XIPKRO-30SM03A1-10IV19	Xiphopenaeus kroyeri	Xipkro	40	10	F	0.51
SM	Externa	3	3	4	01.04.2019	2019	1189	XIPKRO-01SM03A3-10IV19	Xiphopenaeus kroyeri	Xipkro	75	17	F	2.2
SM	Externa	3	3	4	01.04.2019	2019	1189	XIPKRO-02SM03A3-10IV19	Xiphopenaeus kroyeri	Xipkro	99	20	F	6.22
SM	Externa	3	3	4	01.04.2019	2019	1189	XIPKRO-03SM03A3-10IV19	Xiphopenaeus kroyeri	Xipkro	93	18	F	4.56
SM	Externa	3	3	4	01.04.2019	2019	1189	XIPKRO-04SM03A3-10IV19	Xiphopenaeus kroyeri	Xipkro	92	18	F	4.9
SM	Externa	3	3	4	01.04.2019	2019	1189	XIPKRO-05SM03A3-10IV19	Xiphopenaeus kroyeri	Xipkro	67	15	F	1.83
SM	Externa	3	3	4	01.04.2019	2019	1189	XIPKRO-06SM03A3-10IV19	Xiphopenaeus kroyeri	Xipkro	70	17	F	2.25
SM	Externa	3	3	4	01.04.2019	2019	1189	XIPKRO-07SM03A3-10IV19	Xiphopenaeus kroyeri	Xipkro	77	16	F	2.81
SM	Externa	3	3	4	01.04.2019	2019	1189	XIPKRO-08SM03A3-10IV19	Xiphopenaeus kroyeri	Xipkro	75	16	F	2.68
SM	Externa	3	3	4	01.04.2019	2019	1189	XIPKRO-09SM03A3-10IV19	Xiphopenaeus kroyeri	Xipkro	61	12	M	1.25
CV	Interna	1	2	5	01.05.2019	2019	1634.88	XIPKRO-01CA01A2-11V19	Xiphopenaeus kroyeri	Xipkro	81	25	F	3.77
CV	Interna	1	2	5	01.05.2019	2019	1634.88	XIPKRO-02CA01A2-11V19	Xiphopenaeus kroyeri	Xipkro	52	11	F	0.79
CV	Interna	2	2	5	01.05.2019	2019	1322.25	XIPKRO-01CA02A2-11V19	Xiphopenaeus kroyeri	Xipkro	67	24	M	2.62
CV	Interna	2	2	5	01.05.2019	2019	1322.25	XIPKRO-02CA02A2-11V19	Xiphopenaeus kroyeri	Xipkro	63	24	F	2.02
CV	Interna	2	2	5	01.05.2019	2019	1322.25	XIPKRO-03CA02A2-11V19	Xiphopenaeus kroyeri	Xipkro	60	25	F	1.54
CV	Interna	2	2	5	01.05.2019	2019	1322.25	XIPKRO-04CA02A2-11V19	Xiphopenaeus kroyeri	Xipkro	76	29	F	2.83
CV	Interna	2	2	5	01.05.2019	2019	1322.25	XIPKRO-05CA02A2-11V19	Xiphopenaeus kroyeri	Xipkro	56	23	F	1.15
CV	Interna	2	2	5	01.05.2019	2019	1322.25	XIPKRO-06CA02A2-11V19	Xiphopenaeus kroyeri	Xipkro	44	19	F	0.97
CV	Interna	2	2	5	01.05.2019	2019	1322.25	XIPKRO-07CA02A2-11V19	Xiphopenaeus kroyeri	Xipkro	69	25	F	2.73
CV	Interna	2	2	5	01.05.2019	2019	1322.25	XIPKRO-08CA02A2-11V19	Xiphopenaeus kroyeri	Xipkro	77	25	M	3.06
CV	Interna	2	2	5	01.05.2019	2019	1322.25	XIPKRO-09CA02A2-11V19	Xiphopenaeus kroyeri	Xipkro	66	26	M	2.01
CV	Interna	2	2	5	01.05.2019	2019	1322.25	XIPKRO-10CA02A2-11V19	Xiphopenaeus kroyeri	Xipkro	48	19	M	1.34
CV	Interna	2	2	5	01.05.2019	2019	1322.25	XIPKRO-11CA02A2-11V19	Xiphopenaeus kroyeri	Xipkro	51	20	F	1.35
CV	Interna	2	2	5	01.05.2019	2019	1322.25	XIPKRO-12CA02A2-11V19	Xiphopenaeus kroyeri	Xipkro	42	11	F	0.52
CV	Interna	2	2	5	01.05.2019	2019	1322.25	XIPKRO-13CA02A2-11V19	Xiphopenaeus kroyeri	Xipkro	63	22	M	1.8
CV	Interna	2	2	5	01.05.2019	2019	1322.25	XIPKRO-14CA02A2-11V19	Xiphopenaeus kroyeri	Xipkro	76	27	F	4.2
CV	Interna	2	2	5	01.05.2019	2019	1322.25	XIPKRO-15CA02A2-11V19	Xiphopenaeus kroyeri	Xipkro	75	25	F	4.25
CV	Interna	2	2	5	01.05.2019	2019	1322.25	XIPKRO-16CA02A2-11V19	Xiphopenaeus kroyeri	Xipkro	30	11	F	0.28
CV	Interna	2	2	5	01.05.2019	2019	1322.25	XIPKRO-17CA02A2-11V19	Xiphopenaeus kroyeri	Xipkro	54	18	M	1.28
CV	Interna	2	2	5	01.05.2019	2019	1322.25	XIPKRO-18CA02A2-11V19	Xiphopenaeus kroyeri	Xipkro	50	14	M	1.2
CV	Interna	2	2	5	01.05.2019	2019	1322.25	XIPKRO-19CA02A2-11V19	Xiphopenaeus kroyeri	Xipkro	69	22	M	3.03
CV	Interna	2	2	5	01.05.2019	2019	1322.25	XIPKRO-20CA02A2-11V19	Xiphopenaeus kroyeri	Xipkro	54	17	F	1.81
CV	Interna	2	2	5	01.05.2019	2019	1322.25	XIPKRO-21CA02A2-11V19	Xiphopenaeus kroyeri	Xipkro	71	26	M	3.99
CV	Interna	2	2	5	01.05.2019	2019	1322.25	XIPKRO-22CA02A2-11V19	Xiphopenaeus kroyeri	Xipkro	70	25	F	2.37
CV	Interna	2	2	5	01.05.2019	2019	1322.25	XIPKRO-23CA02A2-11V19	Xiphopenaeus kroyeri	Xipkro	67	22	F	3.11
CV	Interna	2	2	5	01.05.2019	2019	1322.25	XIPKRO-24CA02A2-11V19	Xiphopenaeus kroyeri	Xipkro	78	23	M	3.86
CV	Interna	2	2	5	01.05.2019	2019	1322.25	XIPKRO-25CA02A2-11V19	Xiphopenaeus kroyeri	Xipkro	50	13	M	1.07
CV	Interna	2	2	5	01.05.2019	2019	1322.25	XIPKRO-26CA02A2-11V19	Xiphopenaeus kroyeri	Xipkro	83	22	M	4.23
CV	Interna	2	2	5	01.05.2019	2019	1322.25	XIPKRO-27CA02A2-11V19	Xiphopenaeus kroyeri	Xipkro	62	17	F	1.93
CV	Interna	2	2	5	01.05.2019	2019	1322.25	XIPKRO-28CA02A2-11V19	Xiphopenaeus kroyeri	Xipkro	76	21	M	3.8
CV	Interna	2	2	5	01.05.2019	2019	1322.25	XIPKRO-29CA02A2-11V19	Xiphopenaeus kroyeri	Xipkro	80	26	M	5.24
CV	Interna	2	2	5	01.05.2019	2019	1322.25	XIPKRO-30CA02A2-11V19	Xiphopenaeus kroyeri	Xipkro	67	23	M	3.14
CV	Interna	2	2	5	01.05.2019	2019	1322.25	XIPKRO-31CA02A2-11V19	Xiphopenaeus kroyeri	Xipkro	41	10	F	0.89
CV	Externa	3	1	5	01.05.2019	2019	2536.88	XIPKRO-01CA03A1-10V19	Xiphopenaeus kroyeri	Xipkro	86	21	F	3.83
CV	Externa	3	1	5	01.05.2019	2019	2536.88	XIPKRO-02CA03A1-10V19	Xiphopenaeus kroyeri	Xipkro	88	23	F	4.59
CV	Externa	3	1	5	01.05.2019	2019	2536.88	XIPKRO-03CA03A1-10V19	Xiphopenaeus kroyeri	Xipkro	83	22	M	3.28
CV	Externa	3	1	5	01.05.2019	2019	2536.88	XIPKRO-04CA03A1-10V19	Xiphopenaeus kroyeri	Xipkro	75	17	M	2.61
CV	Externa	3	1	5	01.05.2019	2019	2536.88	XIPKRO-05CA03A1-10V19	Xiphopenaeus kroyeri	Xipkro	79	18	F	2.92
CV	Externa	3	1	5	01.05.2019	2019	2536.88	XIPKRO-06CA03A1-10V19	Xiphopenaeus kroyeri	Xipkro	94	22	F	5.11
CV	Externa	3	1	5	01.05.2019	2019	2536.88	XIPKRO-07CA03A1-10V19	Xiphopenaeus kroyeri	Xipkro	91	21	F	4.33
CV	Externa	3	1	5	01.05.2019	2019	2536.88	XIPKRO-08CA03A1-10V19	Xiphopenaeus kroyeri	Xipkro	72	14	M	2.37
CV	Externa	3	1	5	01.05.2019	2019	2536.88	XIPKRO-09CA03A1-10V19	Xiphopenaeus kroyeri	Xipkro	70	16	M	2.09
CV	Externa	3	1	5	01.05.2019	2019	2536.88	XIPKRO-10CA03A1-10V19	Xiphopenaeus kroyeri	Xipkro	56	12	M	1.15
CV	Externa	3	1	5	01.05.2019	2019	2536.88	XIPKRO-11CA03A1-10V19	Xiphopenaeus kroyeri	Xipkro	57	13	M	0.99
CV	Externa	3	1	5	01.05.2019	2019	2536.88	XIPKRO-12CA03A1-10V19	Xiphopenaeus kroyeri	Xipkro	87	19	F	3.1
CV	Externa	3	2	5	01.05.2019	2019	1957.75	XIPKRO-01CA03A2-10V19	Xiphopenaeus kroyeri	Xipkro	93	20	F	4.22
CV	Externa	3	2	5	01.05.2019	2019	1957.75	XIPKRO-02CA03A2-10V19	Xiphopenaeus kroyeri	Xipkro	89	20	M	4.19
CV	Externa	3	2	5	01.05.2019	2019	1957.75	XIPKRO-03CA03A2-10V19	Xiphopenaeus kroyeri	Xipkro	78	18	F	2.23
CV	Externa	3	2	5	01.05.2019	2019	1957.75	XIPKRO-04CA03A2-10V19	Xiphopenaeus kroyeri	Xipkro	73	18	F	2.13
CV	Externa	3	2	5	01.05.2019	2019	1957.75	XIPKRO-05CA03A2-10V19	Xiphopenaeus kroyeri	Xipkro	75	13	M	2.12
CV	Externa	3	2	5	01.05.2019	2019	1957.75	XIPKRO-06CA03A2-10V19	Xiphopenaeus kroyeri	Xipkro	80	19	F	2.97
CV	Externa	3	2	5	01.05.2019	2019	1957.75	XIPKRO-07CA03A2-10V19	Xiphopenaeus kroyeri	Xipkro	68	16	F	1.64
CV	Externa	3	2	5	01.05.2019	2019	1957.75	XIPKRO-08CA03A2-10V19	Xiphopenaeus kroyeri	Xipkro	77	20	F	2.27
CV	Externa	3	2	5	01.05.2019	2019	1957.75	XIPKRO-09CA03A2-10V19	Xiphopenaeus kroyeri	Xipkro	75	22	F	2.3
CV	Externa	3	2	5	01.05.2019	2019	1957.75	XIPKRO-10CA03A2-10V19	Xiphopenaeus kroyeri	Xipkro	74	16	M	2.02
CV	Externa	3	2	5	01.05.2019	2019	1957.75	XIPKRO-11CA03A2-10V19	Xiphopenaeus kroyeri	Xipkro	64	11	F	1.26
CV	Externa	3	2	5	01.05.2019	2019	1957.75	XIPKRO-12CA03A2-10V19	Xiphopenaeus kroyeri	Xipkro	68	16	M	1.72
CV	Externa	3	2	5	01.05.2019	2019	1957.75	XIPKRO-13CA03A2-10V19	Xiphopenaeus kroyeri	Xipkro	66	15	F	1.77
CV	Externa	3	2	5	01.05.2019	2019	1957.75	XIPKRO-14CA03A2-10V19	Xiphopenaeus kroyeri	Xipkro	61	10	M	1.32
CV	Externa	3	2	5	01.05.2019	2019	1957.75	XIPKRO-15CA03A2-10V19	Xiphopenaeus kroyeri	Xipkro	63	11	M	1.41
CV	Externa	3	2	5	01.05.2019	2019	1957.75	XIPKRO-16CA03A2-10V19	Xiphopenaeus kroyeri	Xipkro	84	20	F	3.56
CV	Externa	3	2	5	01.05.2019	2019	1957.75	XIPKRO-17CA03A2-10V19	Xiphopenaeus kroyeri	Xipkro	78	20	M	2.51
CV	Externa	3	2	5	01.05.2019	2019	1957.75	XIPKRO-18CA03A2-10V19	Xiphopenaeus kroyeri	Xipkro	63	16	F	1.44
CV	Externa	3	2	5	01.05.2019	2019	1957.75	XIPKRO-19CA03A2-10V19	Xiphopenaeus kroyeri	Xipkro	44	10	F	0.66
CV	Externa	3	2	5	01.05.2019	2019	1957.75	XIPKRO-20CA03A2-10V19	Xiphopenaeus kroyeri	Xipkro	93	20	F	5.1
CV	Externa	3	2	5	01.05.2019	2019	1957.75	XIPKRO-21CA03A2-10V19	Xiphopenaeus kroyeri	Xipkro	82	20	F	3.2
CV	Externa	3	2	5	01.05.2019	2019	1957.75	XIPKRO-22CA03A2-10V19	Xiphopenaeus kroyeri	Xipkro	83	20	M	3.59
CV	Externa	3	2	5	01.05.2019	2019	1957.75	XIPKRO-23CA03A2-10V19	Xiphopenaeus kroyeri	Xipkro	83	20	F	3.43
CV	Externa	3	2	5	01.05.2019	2019	1957.75	XIPKRO-24CA03A2-10V19	Xiphopenaeus kroyeri	Xipkro	82	19	F	3.29
CV	Externa	3	2	5	01.05.2019	2019	1957.75	XIPKRO-25CA03A2-10V19	Xiphopenaeus kroyeri	Xipkro	81	19	M	3.45
CV	Externa	3	2	5	01.05.2019	2019	1957.75	XIPKRO-26CA03A2-10V19	Xiphopenaeus kroyeri	Xipkro	69	17	M	2.06
CV	Externa	3	2	5	01.05.2019	2019	1957.75	XIPKRO-27CA03A2-10V19	Xiphopenaeus kroyeri	Xipkro	65	12	F	1.24
CV	Externa	3	2	5	01.05.2019	2019	1957.75	XIPKRO-28CA03A2-10V19	Xiphopenaeus kroyeri	Xipkro	88	18	M	3.79
CV	Externa	3	2	5	01.05.2019	2019	1957.75	XIPKRO-29CA03A2-10V19	Xiphopenaeus kroyeri	Xipkro	64	13	M	1.34
CV	Externa	3	2	5	01.05.2019	2019	1957.75	XIPKRO-30CA03A2-10V19	Xiphopenaeus kroyeri	Xipkro	75	18	F	2.49
CV	Externa	3	2	5	01.05.2019	2019	1957.75		Xiphopenaeus kroyeri	Xipkro				93.55
CV	Externa	3	3	5	01.05.2019	2019	2260.12	XIPKRO-01CA03A3-10V19	Xiphopenaeus kroyeri	Xipkro	91	21	F	4.63
CV	Externa	3	3	5	01.05.2019	2019	2260.12	XIPKRO-02CA03A3-10V19	Xiphopenaeus kroyeri	Xipkro	89	23	F	3.48
CV	Externa	3	3	5	01.05.2019	2019	2260.12	XIPKRO-03CA03A3-10V19	Xiphopenaeus kroyeri	Xipkro	75	18	F	3.1
CV	Externa	3	3	5	01.05.2019	2019	2260.12	XIPKRO-04CA03A3-10V19	Xiphopenaeus kroyeri	Xipkro	100	25	F	5.23
CV	Externa	3	3	5	01.05.2019	2019	2260.12	XIPKRO-05CA03A3-10V19	Xiphopenaeus kroyeri	Xipkro	80	18	F	3.23
CV	Externa	3	3	5	01.05.2019	2019	2260.12	XIPKRO-06CA03A3-10V19	Xiphopenaeus kroyeri	Xipkro	56	16	M	1.39
CV	Externa	3	3	5	01.05.2019	2019	2260.12	XIPKRO-07CA03A3-10V19	Xiphopenaeus kroyeri	Xipkro	81	21	M	4.51
CV	Externa	3	3	5	01.05.2019	2019	2260.12	XIPKRO-08CA03A3-10V19	Xiphopenaeus kroyeri	Xipkro	72	17	F	3.05
CV	Externa	3	3	5	01.05.2019	2019	2260.12	XIPKRO-09CA03A3-10V19	Xiphopenaeus kroyeri	Xipkro	85	17	M	2.02
CV	Externa	3	3	5	01.05.2019	2019	2260.12	XIPKRO-10CA03A3-10V19	Xiphopenaeus kroyeri	Xipkro	63	12	F	1.96
CV	Externa	3	3	5	01.05.2019	2019	2260.12	XIPKRO-11CA03A3-10V19	Xiphopenaeus kroyeri	Xipkro	68	15	F	1.09
CV	Externa	3	3	5	01.05.2019	2019	2260.12	XIPKRO-12CA03A3-10V19	Xiphopenaeus kroyeri	Xipkro	75	15	M	3.59
CV	Externa	3	3	5	01.05.2019	2019	2260.12	XIPKRO-13CA03A3-10V19	Xiphopenaeus kroyeri	Xipkro	58	11	M	1.29
CV	Externa	3	3	5	01.05.2019	2019	2260.12	XIPKRO-14CA03A3-10V19	Xiphopenaeus kroyeri	Xipkro	60	11	F	1.13
CV	Externa	3	3	5	01.05.2019	2019	2260.12	XIPKRO-15CA03A3-10V19	Xiphopenaeus kroyeri	Xipkro	64	11	F	1.46
CV	Externa	3	3	5	01.05.2019	2019	2260.12	XIPKRO-16CA03A3-10V19	Xiphopenaeus kroyeri	Xipkro	71	14	F	1.59
CV	Externa	3	3	5	01.05.2019	2019	2260.12	XIPKRO-17CA03A3-10V19	Xiphopenaeus kroyeri	Xipkro	71	15	F	1.65
CV	Externa	3	3	5	01.05.2019	2019	2260.12	XIPKRO-18CA03A3-10V19	Xiphopenaeus kroyeri	Xipkro	55	10	F	0.87
CV	Externa	3	3	5	01.05.2019	2019	2260.12	XIPKRO-19CA03A3-10V19	Xiphopenaeus kroyeri	Xipkro	84	21	F	3.4
CV	Externa	3	3	5	01.05.2019	2019	2260.12	XIPKRO-20CA03A3-10V19	Xiphopenaeus kroyeri	Xipkro	79	18	F	2.63
CV	Externa	3	3	5	01.05.2019	2019	2260.12	XIPKRO-21CA03A3-10V19	Xiphopenaeus kroyeri	Xipkro	58	12	F	1.12
CV	Externa	3	3	5	01.05.2019	2019	2260.12	XIPKRO-22CA03A3-10V19	Xiphopenaeus kroyeri	Xipkro	84	13	F	3.09
CV	Externa	3	3	5	01.05.2019	2019	2260.12	XIPKRO-23CA03A3-10V19	Xiphopenaeus kroyeri	Xipkro	62	11	M	1.25
CV	Externa	3	3	5	01.05.2019	2019	2260.12	XIPKRO-24CA03A3-10V19	Xiphopenaeus kroyeri	Xipkro	81	15	M	3.28
CV	Externa	3	3	5	01.05.2019	2019	2260.12	XIPKRO-25CA03A3-10V19	Xiphopenaeus kroyeri	Xipkro	81	18	M	3.21
CV	Externa	3	3	5	01.05.2019	2019	2260.12	XIPKRO-26CA03A3-10V19	Xiphopenaeus kroyeri	Xipkro	88	22	M	3.86
CV	Externa	3	3	5	01.05.2019	2019	2260.12	XIPKRO-27CA03A3-10V19	Xiphopenaeus kroyeri	Xipkro	82	21	F	3.25
CV	Externa	3	3	5	01.05.2019	2019	2260.12	XIPKRO-28CA03A3-10V19	Xiphopenaeus kroyeri	Xipkro	62	12	F	1.55
CV	Externa	3	3	5	01.05.2019	2019	2260.12	XIPKRO-29CA03A3-10V19	Xiphopenaeus kroyeri	Xipkro	72	15	F	1.67
CV	Externa	3	3	5	01.05.2019	2019	2260.12	XIPKRO-30CA03A3-10V19	Xiphopenaeus kroyeri	Xipkro	51	8	M	0.76
CV	Externa	3	3	5	01.05.2019	2019	2260.12		Xiphopenaeus kroyeri	Xipkro				182.64
CV	Externa	4	1	5	01.05.2019	2019	1962.88	XIPKRO-01CA04A1-10V19	Xiphopenaeus kroyeri	Xipkro	102	27	F	5.72
CV	Externa	4	1	5	01.05.2019	2019	1962.88	XIPKRO-02CA04A1-10V19	Xiphopenaeus kroyeri	Xipkro	96	23	F	4.68
CV	Externa	4	1	5	01.05.2019	2019	1962.88	XIPKRO-03CA04A1-10V19	Xiphopenaeus kroyeri	Xipkro	91	24	F	4.58
CV	Externa	4	1	5	01.05.2019	2019	1962.88	XIPKRO-04CA04A1-10V19	Xiphopenaeus kroyeri	Xipkro	88	21	M	3.64
CV	Externa	4	1	5	01.05.2019	2019	1962.88	XIPKRO-05CA04A1-10V19	Xiphopenaeus kroyeri	Xipkro	81	22	M	3.26
CV	Externa	4	1	5	01.05.2019	2019	1962.88	XIPKRO-06CA04A1-10V19	Xiphopenaeus kroyeri	Xipkro	88	21	M	3.97
CV	Externa	4	1	5	01.05.2019	2019	1962.88	XIPKRO-07CA04A1-10V19	Xiphopenaeus kroyeri	Xipkro	79	20	M	2.73
CV	Externa	4	1	5	01.05.2019	2019	1962.88	XIPKRO-08CA04A1-10V19	Xiphopenaeus kroyeri	Xipkro	73	22	M	2.04
CV	Externa	4	1	5	01.05.2019	2019	1962.88	XIPKRO-09CA04A1-10V19	Xiphopenaeus kroyeri	Xipkro	65	12	M	1.46
CV	Externa	4	1	5	01.05.2019	2019	1962.88	XIPKRO-10CA04A1-10V19	Xiphopenaeus kroyeri	Xipkro	98	25	F	6.03
CV	Externa	4	1	5	01.05.2019	2019	1962.88	XIPKRO-11CA04A1-10V19	Xiphopenaeus kroyeri	Xipkro	61	13	M	1.22
CV	Externa	4	1	5	01.05.2019	2019	1962.88	XIPKRO-12CA04A1-10V19	Xiphopenaeus kroyeri	Xipkro	84	19	M	3.51
CV	Externa	4	1	5	01.05.2019	2019	1962.88	XIPKRO-13CA04A1-10V19	Xiphopenaeus kroyeri	Xipkro	90	20	F	4.27
CV	Externa	4	1	5	01.05.2019	2019	1962.88	XIPKRO-14CA04A1-10V19	Xiphopenaeus kroyeri	Xipkro	74	16	M	2.92
CV	Externa	4	1	5	01.05.2019	2019	1962.88	XIPKRO-15CA04A1-10V19	Xiphopenaeus kroyeri	Xipkro	95	15	F	4.43
CV	Externa	4	1	5	01.05.2019	2019	1962.88	XIPKRO-16CA04A1-10V19	Xiphopenaeus kroyeri	Xipkro	98	20	F	5.91
CV	Externa	4	1	5	01.05.2019	2019	1962.88	XIPKRO-17CA04A1-10V19	Xiphopenaeus kroyeri	Xipkro	66	18	F	1.92
CV	Externa	4	1	5	01.05.2019	2019	1962.88	XIPKRO-18CA04A1-10V19	Xiphopenaeus kroyeri	Xipkro	91	17	F	3.74
CV	Externa	4	1	5	01.05.2019	2019	1962.88	XIPKRO-19CA04A1-10V19	Xiphopenaeus kroyeri	Xipkro	82	18	M	2.54
CV	Externa	4	1	5	01.05.2019	2019	1962.88	XIPKRO-20CA04A1-10V19	Xiphopenaeus kroyeri	Xipkro	71	17	M	2.38
CV	Externa	4	1	5	01.05.2019	2019	1962.88	XIPKRO-21CA04A1-10V19	Xiphopenaeus kroyeri	Xipkro	80	17	M	3.44
CV	Externa	4	1	5	01.05.2019	2019	1962.88	XIPKRO-22CA04A1-10V19	Xiphopenaeus kroyeri	Xipkro	80	17	M	2.38
CV	Externa	4	1	5	01.05.2019	2019	1962.88	XIPKRO-23CA04A1-10V19	Xiphopenaeus kroyeri	Xipkro	101	22	M	5.54
CV	Externa	4	1	5	01.05.2019	2019	1962.88	XIPKRO-24CA04A1-10V19	Xiphopenaeus kroyeri	Xipkro	81	18	M	2.86
CV	Externa	4	1	5	01.05.2019	2019	1962.88	XIPKRO-25CA04A1-10V19	Xiphopenaeus kroyeri	Xipkro	51	10	F	0.79
CV	Externa	4	1	5	01.05.2019	2019	1962.88	XIPKRO-26CA04A1-10V19	Xiphopenaeus kroyeri	Xipkro	82	18	F	2.92
CV	Externa	4	1	5	01.05.2019	2019	1962.88	XIPKRO-27CA04A1-10V19	Xiphopenaeus kroyeri	Xipkro	80	18	M	2.5
CV	Externa	4	1	5	01.05.2019	2019	1962.88	XIPKRO-28CA04A1-10V19	Xiphopenaeus kroyeri	Xipkro	79	12	M	2.29
CV	Externa	4	1	5	01.05.2019	2019	1962.88	XIPKRO-29CA04A1-10V19	Xiphopenaeus kroyeri	Xipkro	73	14	M	2.18
CV	Externa	4	1	5	01.05.2019	2019	1962.88	XIPKRO-30CA04A1-10V19	Xiphopenaeus kroyeri	Xipkro	83	19	M	3.39
CV	Externa	4	1	5	01.05.2019	2019	1962.88		Xiphopenaeus kroyeri	Xipkro				133.73
CV	Externa	4	2	5	01.05.2019	2019	1860.38	XIPKRO-01CA04A2-10V19	Xiphopenaeus kroyeri	Xipkro	100	28	F	5.83
CV	Externa	4	2	5	01.05.2019	2019	1860.38	XIPKRO-02CA04A2-10V19	Xiphopenaeus kroyeri	Xipkro	78	16	M	2.28
CV	Externa	4	2	5	01.05.2019	2019	1860.38	XIPKRO-03CA04A2-10V19	Xiphopenaeus kroyeri	Xipkro	84	24	M	4.27
CV	Externa	4	2	5	01.05.2019	2019	1860.38	XIPKRO-04CA04A2-10V19	Xiphopenaeus kroyeri	Xipkro	75	16	M	1.97
CV	Externa	4	2	5	01.05.2019	2019	1860.38	XIPKRO-05CA04A2-10V19	Xiphopenaeus kroyeri	Xipkro	80	16	M	2.87
CV	Externa	4	2	5	01.05.2019	2019	1860.38	XIPKRO-06CA04A2-10V19	Xiphopenaeus kroyeri	Xipkro	91	22	M	3.74
CV	Externa	4	2	5	01.05.2019	2019	1860.38	XIPKRO-07CA04A2-10V19	Xiphopenaeus kroyeri	Xipkro	89	20	M	3.55
CV	Externa	4	2	5	01.05.2019	2019	1860.38	XIPKRO-08CA04A2-10V19	Xiphopenaeus kroyeri	Xipkro	89	19	F	3.11
CV	Externa	4	2	5	01.05.2019	2019	1860.38	XIPKRO-09CA04A2-10V19	Xiphopenaeus kroyeri	Xipkro	96	24	F	4.59
CV	Externa	4	2	5	01.05.2019	2019	1860.38	XIPKRO-10CA04A2-10V19	Xiphopenaeus kroyeri	Xipkro	86	21	M	3.42
CV	Externa	4	2	5	01.05.2019	2019	1860.38	XIPKRO-11CA04A2-10V19	Xiphopenaeus kroyeri	Xipkro	81	19	F	2.76
CV	Externa	4	2	5	01.05.2019	2019	1860.38	XIPKRO-12CA04A2-10V19	Xiphopenaeus kroyeri	Xipkro	84	20	F	3.13
CV	Externa	4	2	5	01.05.2019	2019	1860.38	XIPKRO-13CA04A2-10V19	Xiphopenaeus kroyeri	Xipkro	79	18	F	2.27
CV	Externa	4	2	5	01.05.2019	2019	1860.38	XIPKRO-14CA04A2-10V19	Xiphopenaeus kroyeri	Xipkro	76	17	M	2.7
CV	Externa	4	2	5	01.05.2019	2019	1860.38	XIPKRO-15CA04A2-10V19	Xiphopenaeus kroyeri	Xipkro	100	25	F	5.21
CV	Externa	4	2	5	01.05.2019	2019	1860.38	XIPKRO-16CA04A2-10V19	Xiphopenaeus kroyeri	Xipkro	92	22	M	4.03
CV	Externa	4	2	5	01.05.2019	2019	1860.38	XIPKRO-17CA04A2-10V19	Xiphopenaeus kroyeri	Xipkro	95	24	F	3.81
CV	Externa	4	2	5	01.05.2019	2019	1860.38	XIPKRO-18CA04A2-10V19	Xiphopenaeus kroyeri	Xipkro	71	16	F	1.43
CV	Externa	4	2	5	01.05.2019	2019	1860.38	XIPKRO-19CA04A2-10V19	Xiphopenaeus kroyeri	Xipkro	87	22	M	3.78
CV	Externa	4	2	5	01.05.2019	2019	1860.38	XIPKRO-20CA04A2-10V19	Xiphopenaeus kroyeri	Xipkro	79	17	M	2.74
CV	Externa	4	2	5	01.05.2019	2019	1860.38	XIPKRO-21CA04A2-10V19	Xiphopenaeus kroyeri	Xipkro	77	20	F	3.29
CV	Externa	4	2	5	01.05.2019	2019	1860.38	XIPKRO-22CA04A2-10V19	Xiphopenaeus kroyeri	Xipkro	75	16	F	1.74
CV	Externa	4	2	5	01.05.2019	2019	1860.38	XIPKRO-23CA04A2-10V19	Xiphopenaeus kroyeri	Xipkro	84	17	M	2.61
CV	Externa	4	2	5	01.05.2019	2019	1860.38	XIPKRO-24CA04A2-10V19	Xiphopenaeus kroyeri	Xipkro	80	18	F	2.17
CV	Externa	4	2	5	01.05.2019	2019	1860.38	XIPKRO-25CA04A2-10V19	Xiphopenaeus kroyeri	Xipkro	82	19	M	2.82
CV	Externa	4	2	5	01.05.2019	2019	1860.38	XIPKRO-26CA04A2-10V19	Xiphopenaeus kroyeri	Xipkro	65	14	M	1.29
CV	Externa	4	2	5	01.05.2019	2019	1860.38	XIPKRO-27CA04A2-10V19	Xiphopenaeus kroyeri	Xipkro	105	25	F	5.01
CV	Externa	4	2	5	01.05.2019	2019	1860.38	XIPKRO-28CA04A2-10V19	Xiphopenaeus kroyeri	Xipkro	62	14	F	1
CV	Externa	4	2	5	01.05.2019	2019	1860.38	XIPKRO-29CA04A2-10V19	Xiphopenaeus kroyeri	Xipkro	66	14	M	1.39
CV	Externa	4	2	5	01.05.2019	2019	1860.38	XIPKRO-30CA04A2-10V19	Xiphopenaeus kroyeri	Xipkro	96	22	M	4.27
CV	Externa	4	2	5	01.05.2019	2019	1860.38		Xiphopenaeus kroyeri	Xipkro				537.92
CV	Externa	4	3	5	01.05.2019	2019	1778.38	XIPKRO-01CA04A3-10V19	Xiphopenaeus kroyeri	Xipkro	84	24	M	3.58
CV	Externa	4	3	5	01.05.2019	2019	1778.38	XIPKRO-02CA04A3-10V19	Xiphopenaeus kroyeri	Xipkro	87	19	M	3.69
CV	Externa	4	3	5	01.05.2019	2019	1778.38	XIPKRO-03CA04A3-10V19	Xiphopenaeus kroyeri	Xipkro	80	19	M	2.77
CV	Externa	4	3	5	01.05.2019	2019	1778.38	XIPKRO-04CA04A3-10V19	Xiphopenaeus kroyeri	Xipkro	72	18	M	2.51
CV	Externa	4	3	5	01.05.2019	2019	1778.38	XIPKRO-05CA04A3-10V19	Xiphopenaeus kroyeri	Xipkro	81	19	M	2.61
CV	Externa	4	3	5	01.05.2019	2019	1778.38	XIPKRO-06CA04A3-10V19	Xiphopenaeus kroyeri	Xipkro	74	19	M	2.22
CV	Externa	4	3	5	01.05.2019	2019	1778.38	XIPKRO-07CA04A3-10V19	Xiphopenaeus kroyeri	Xipkro	66	15	M	1.47
CV	Externa	4	3	5	01.05.2019	2019	1778.38	XIPKRO-08CA04A3-10V19	Xiphopenaeus kroyeri	Xipkro	68	15	F	1.88
CV	Externa	4	3	5	01.05.2019	2019	1778.38	XIPKRO-09CA04A3-10V19	Xiphopenaeus kroyeri	Xipkro	45	10	F	0.55
CV	Externa	4	3	5	01.05.2019	2019	1778.38	XIPKRO-10CA04A3-10V19	Xiphopenaeus kroyeri	Xipkro	65	14	F	1.53
CV	Externa	4	3	5	01.05.2019	2019	1778.38	XIPKRO-11CA04A3-10V19	Xiphopenaeus kroyeri	Xipkro	70	18	M	2.03
CV	Externa	4	3	5	01.05.2019	2019	1778.38	XIPKRO-12CA04A3-10V19	Xiphopenaeus kroyeri	Xipkro	88	22	F	4.28
CV	Externa	4	3	5	01.05.2019	2019	1778.38	XIPKRO-13CA04A3-10V19	Xiphopenaeus kroyeri	Xipkro	72	19	F	2.51
CV	Externa	4	3	5	01.05.2019	2019	1778.38	XIPKRO-14CA04A3-10V19	Xiphopenaeus kroyeri	Xipkro	53	12	F	0.82
CV	Externa	4	3	5	01.05.2019	2019	1778.38	XIPKRO-15CA04A3-10V19	Xiphopenaeus kroyeri	Xipkro	56	12	M	0.87
CV	Externa	4	3	5	01.05.2019	2019	1778.38	XIPKRO-16CA04A3-10V19	Xiphopenaeus kroyeri	Xipkro	46	10	F	0.47
CV	Externa	4	3	5	01.05.2019	2019	1778.38	XIPKRO-17CA04A3-10V19	Xiphopenaeus kroyeri	Xipkro	70	17	M	2.29
CV	Externa	4	3	5	01.05.2019	2019	1778.38	XIPKRO-18CA04A3-10V19	Xiphopenaeus kroyeri	Xipkro	70	18	F	1.98
CV	Externa	4	3	5	01.05.2019	2019	1778.38	XIPKRO-19CA04A3-10V19	Xiphopenaeus kroyeri	Xipkro	74	16	M	2.33
CV	Externa	4	3	5	01.05.2019	2019	1778.38	XIPKRO-20CA04A3-10V19	Xiphopenaeus kroyeri	Xipkro	72	17	M	2.07
CV	Externa	4	3	5	01.05.2019	2019	1778.38	XIPKRO-21CA04A3-10V19	Xiphopenaeus kroyeri	Xipkro	87	22	M	4.1
CV	Externa	4	3	5	01.05.2019	2019	1778.38	XIPKRO-22CA04A3-10V19	Xiphopenaeus kroyeri	Xipkro	54	12	F	1.15
CV	Externa	4	3	5	01.05.2019	2019	1778.38	XIPKRO-23CA04A3-10V19	Xiphopenaeus kroyeri	Xipkro	70	15	F	2.46
CV	Externa	4	3	5	01.05.2019	2019	1778.38	XIPKRO-24CA04A3-10V19	Xiphopenaeus kroyeri	Xipkro	75	14	F	2.35
CV	Externa	4	3	5	01.05.2019	2019	1778.38	XIPKRO-25CA04A3-10V19	Xiphopenaeus kroyeri	Xipkro	90	21	M	4.54
CV	Externa	4	3	5	01.05.2019	2019	1778.38	XIPKRO-26CA04A3-10V19	Xiphopenaeus kroyeri	Xipkro	79	14	M	2.51
CV	Externa	4	3	5	01.05.2019	2019	1778.38	XIPKRO-27CA04A3-10V19	Xiphopenaeus kroyeri	Xipkro	81	18	M	2.72
CV	Externa	4	3	5	01.05.2019	2019	1778.38	XIPKRO-28CA04A3-10V19	Xiphopenaeus kroyeri	Xipkro	70	17	F	1.8
CV	Externa	4	3	5	01.05.2019	2019	1778.38	XIPKRO-29CA04A3-10V19	Xiphopenaeus kroyeri	Xipkro	71	13	M	2.05
CV	Externa	4	3	5	01.05.2019	2019	1778.38	XIPKRO-30CA04A3-10V19	Xiphopenaeus kroyeri	Xipkro	71	15	F	2.12
CV	Externa	4	3	5	01.05.2019	2019	1778.38		Xiphopenaeus kroyeri	Xipkro				330.77
CV	Externa	5	2	5	01.05.2019	2019	1793.75	XIPKRO-01CA05A2-10V19	Xiphopenaeus kroyeri	Xipkro	80	17	M	3.3
CV	Externa	5	2	5	01.05.2019	2019	1793.75	XIPKRO-02CA05A2-10V19	Xiphopenaeus kroyeri	Xipkro	77	17	M	3.31
CV	Externa	5	2	5	01.05.2019	2019	1793.75	XIPKRO-03CA05A2-10V19	Xiphopenaeus kroyeri	Xipkro	61	12	M	1.15
CV	Externa	5	2	5	01.05.2019	2019	1793.75	XIPKRO-04CA05A2-10V19	Xiphopenaeus kroyeri	Xipkro	64	13	M	1.5
CV	Externa	5	2	5	01.05.2019	2019	1793.75	XIPKRO-05CA05A2-10V19	Xiphopenaeus kroyeri	Xipkro	58	12	F	1.17
CV	Externa	5	2	5	01.05.2019	2019	1793.75	XIPKRO-06CA05A2-10V19	Xiphopenaeus kroyeri	Xipkro	85	19	M	4.2
CV	Externa	5	2	5	01.05.2019	2019	1793.75	XIPKRO-07CA05A2-10V19	Xiphopenaeus kroyeri	Xipkro	50	11	M	0.99
CV	Externa	5	2	5	01.05.2019	2019	1793.75	XIPKRO-08CA05A2-10V19	Xiphopenaeus kroyeri	Xipkro	83	20	M	3.56
CV	Externa	5	2	5	01.05.2019	2019	1793.75	XIPKRO-09CA05A2-10V19	Xiphopenaeus kroyeri	Xipkro	78	17	M	2.78
CV	Externa	5	2	5	01.05.2019	2019	1793.75	XIPKRO-10CA05A2-10V19	Xiphopenaeus kroyeri	Xipkro	79	13	M	1.61
CV	Externa	5	2	5	01.05.2019	2019	1793.75	XIPKRO-11CA05A2-10V19	Xiphopenaeus kroyeri	Xipkro	63	13	M	1.87
CV	Externa	5	2	5	01.05.2019	2019	1793.75	XIPKRO-12CA05A2-10V19	Xiphopenaeus kroyeri	Xipkro	83	19	M	4.08
CV	Externa	5	2	5	01.05.2019	2019	1793.75	XIPKRO-13CA05A2-10V19	Xiphopenaeus kroyeri	Xipkro	75	16	M	3.06
CV	Externa	5	2	5	01.05.2019	2019	1793.75	XIPKRO-14CA05A2-10V19	Xiphopenaeus kroyeri	Xipkro	79	18	F	2.46
CV	Externa	5	2	5	01.05.2019	2019	1793.75	XIPKRO-15CA05A2-10V19	Xiphopenaeus kroyeri	Xipkro	65	13	F	1.71
CV	Externa	5	2	5	01.05.2019	2019	1793.75	XIPKRO-16CA05A2-10V19	Xiphopenaeus kroyeri	Xipkro	56	10	F	0.9
CV	Externa	5	2	5	01.05.2019	2019	1793.75	XIPKRO-17CA05A2-10V19	Xiphopenaeus kroyeri	Xipkro	63	13	M	1.49
CV	Externa	5	2	5	01.05.2019	2019	1793.75	XIPKRO-18CA05A2-10V19	Xiphopenaeus kroyeri	Xipkro	75	15	M	2.15
CV	Externa	5	2	5	01.05.2019	2019	1793.75	XIPKRO-19CA05A2-10V19	Xiphopenaeus kroyeri	Xipkro	70	14	F	2.01
CV	Externa	5	2	5	01.05.2019	2019	1793.75	XIPKRO-20CA05A2-10V19	Xiphopenaeus kroyeri	Xipkro	55	12	F	0.86
CV	Externa	5	2	5	01.05.2019	2019	1793.75	XIPKRO-21CA05A2-10V19	Xiphopenaeus kroyeri	Xipkro	70	14	M	2.19
CV	Externa	5	2	5	01.05.2019	2019	1793.75	XIPKRO-22CA05A2-10V19	Xiphopenaeus kroyeri	Xipkro	65	13	M	1.45
CV	Externa	5	2	5	01.05.2019	2019	1793.75	XIPKRO-23CA05A2-10V19	Xiphopenaeus kroyeri	Xipkro	62	12	M	1.3
CV	Externa	5	2	5	01.05.2019	2019	1793.75	XIPKRO-24CA05A2-10V19	Xiphopenaeus kroyeri	Xipkro	75	15	M	2.34
CV	Externa	5	2	5	01.05.2019	2019	1793.75	XIPKRO-25CA05A2-10V19	Xiphopenaeus kroyeri	Xipkro	79	16	M	3.14
CV	Externa	5	2	5	01.05.2019	2019	1793.75	XIPKRO-26CA05A2-10V19	Xiphopenaeus kroyeri	Xipkro	77	16	M	2.86
CV	Externa	5	2	5	01.05.2019	2019	1793.75	XIPKRO-27CA05A2-10V19	Xiphopenaeus kroyeri	Xipkro	65	15	M	1.95
CV	Externa	5	2	5	01.05.2019	2019	1793.75	XIPKRO-28CA05A2-10V19	Xiphopenaeus kroyeri	Xipkro	61	13	M	1.5
CV	Externa	5	2	5	01.05.2019	2019	1793.75	XIPKRO-29CA05A2-10V19	Xiphopenaeus kroyeri	Xipkro	60	11	M	1.24
CV	Externa	5	2	5	01.05.2019	2019	1793.75	XIPKRO-30CA05A2-10V19	Xiphopenaeus kroyeri	Xipkro	76	14	M	2.41
CV	Externa	5	2	5	01.05.2019	2019	1793.75		Xiphopenaeus kroyeri	Xipkro				105.88
CV	Externa	5	3	5	01.05.2019	2019	1783.5	XIPKRO-01CA05A3-10V19	Xiphopenaeus kroyeri	Xipkro	81	19	M	3.64
CV	Externa	5	3	5	01.05.2019	2019	1783.5	XIPKRO-02CA05A3-10V19	Xiphopenaeus kroyeri	Xipkro	77	18	M	2.87
CV	Externa	5	3	5	01.05.2019	2019	1783.5	XIPKRO-03CA05A3-10V19	Xiphopenaeus kroyeri	Xipkro	75	18	M	2.55
CV	Externa	5	3	5	01.05.2019	2019	1783.5	XIPKRO-04CA05A3-10V19	Xiphopenaeus kroyeri	Xipkro	79	19	M	3.16
CV	Externa	5	3	5	01.05.2019	2019	1783.5	XIPKRO-05CA05A3-10V19	Xiphopenaeus kroyeri	Xipkro	74	18	M	3.25
CV	Externa	5	3	5	01.05.2019	2019	1783.5	XIPKRO-06CA05A3-10V19	Xiphopenaeus kroyeri	Xipkro	78	19	M	3.48
CV	Externa	5	3	5	01.05.2019	2019	1783.5	XIPKRO-07CA05A3-10V19	Xiphopenaeus kroyeri	Xipkro	81	19	M	3.47
CV	Externa	5	3	5	01.05.2019	2019	1783.5	XIPKRO-08CA05A3-10V19	Xiphopenaeus kroyeri	Xipkro	66	16	F	1.84
CV	Externa	5	3	5	01.05.2019	2019	1783.5	XIPKRO-09CA05A3-10V19	Xiphopenaeus kroyeri	Xipkro	75	18	F	2.69
CV	Externa	5	3	5	01.05.2019	2019	1783.5	XIPKRO-10CA05A3-10V19	Xiphopenaeus kroyeri	Xipkro	79	18	M	2.89
CV	Externa	5	3	5	01.05.2019	2019	1783.5	XIPKRO-11CA05A3-10V19	Xiphopenaeus kroyeri	Xipkro	70	17	M	2.51
CV	Externa	5	3	5	01.05.2019	2019	1783.5	XIPKRO-12CA05A3-10V19	Xiphopenaeus kroyeri	Xipkro	54	14	M	1.41
CV	Externa	5	3	5	01.05.2019	2019	1783.5	XIPKRO-13CA05A3-10V19	Xiphopenaeus kroyeri	Xipkro	66	16	M	2.02
CV	Externa	5	3	5	01.05.2019	2019	1783.5	XIPKRO-14CA05A3-10V19	Xiphopenaeus kroyeri	Xipkro	55	13	F	0.95
CV	Externa	5	3	5	01.05.2019	2019	1783.5	XIPKRO-15CA05A3-10V19	Xiphopenaeus kroyeri	Xipkro	54	12	M	0.93
CV	Externa	5	3	5	01.05.2019	2019	1783.5	XIPKRO-16CA05A3-10V19	Xiphopenaeus kroyeri	Xipkro	73	18	M	3.44
CV	Externa	5	3	5	01.05.2019	2019	1783.5	XIPKRO-17CA05A3-10V19	Xiphopenaeus kroyeri	Xipkro	54	13	M	1.2
CV	Externa	5	3	5	01.05.2019	2019	1783.5	XIPKRO-18CA05A3-10V19	Xiphopenaeus kroyeri	Xipkro	69	17	M	1.69
CV	Externa	5	3	5	01.05.2019	2019	1783.5	XIPKRO-19CA05A3-10V19	Xiphopenaeus kroyeri	Xipkro	66	15	M	1.67
CV	Externa	5	3	5	01.05.2019	2019	1783.5	XIPKRO-20CA05A3-10V19	Xiphopenaeus kroyeri	Xipkro	85	21	M	3.68
CV	Externa	5	3	5	01.05.2019	2019	1783.5	XIPKRO-21CA05A3-10V19	Xiphopenaeus kroyeri	Xipkro	73	18	M	2.58
CV	Externa	5	3	5	01.05.2019	2019	1783.5	XIPKRO-22CA05A3-10V19	Xiphopenaeus kroyeri	Xipkro	78	18	M	2.66
CV	Externa	5	3	5	01.05.2019	2019	1783.5	XIPKRO-23CA05A3-10V19	Xiphopenaeus kroyeri	Xipkro	77	18	F	2.71
CV	Externa	5	3	5	01.05.2019	2019	1783.5	XIPKRO-24CA05A3-10V19	Xiphopenaeus kroyeri	Xipkro	60	13	M	1.29
CV	Externa	5	3	5	01.05.2019	2019	1783.5	XIPKRO-25CA05A3-10V19	Xiphopenaeus kroyeri	Xipkro	66	16	M	1.64
CV	Externa	5	3	5	01.05.2019	2019	1783.5	XIPKRO-26CA05A3-10V19	Xiphopenaeus kroyeri	Xipkro	67	16	M	1.63
CV	Externa	5	3	5	01.05.2019	2019	1783.5	XIPKRO-27CA05A3-10V19	Xiphopenaeus kroyeri	Xipkro	61	15	F	1.4
CV	Externa	5	3	5	01.05.2019	2019	1783.5	XIPKRO-28CA05A3-10V19	Xiphopenaeus kroyeri	Xipkro	61	15	F	1.18
CV	Externa	5	3	5	01.05.2019	2019	1783.5	XIPKRO-29CA05A3-10V19	Xiphopenaeus kroyeri	Xipkro	50	12	M	0.73
CV	Externa	5	3	5	01.05.2019	2019	1783.5	XIPKRO-30CA05A3-10V19	Xiphopenaeus kroyeri	Xipkro	50	12	F	0.7
CV	Externa	5	3	5	01.05.2019	2019	1783.5		Xiphopenaeus kroyeri	Xipkro				284.25
CV	Externa	6	1	5	01.05.2019	2019	1875.75	XIPKRO-01CA06A1-10V19	Xiphopenaeus kroyeri	Xipkro	77	16	M	2.69
CV	Externa	6	1	5	01.05.2019	2019	1875.75	XIPKRO-02CA06A1-10V19	Xiphopenaeus kroyeri	Xipkro	87	19	F	3.61
CV	Externa	6	1	5	01.05.2019	2019	1875.75	XIPKRO-03CA06A1-10V19	Xiphopenaeus kroyeri	Xipkro	75	17	M	3.3
CV	Externa	6	1	5	01.05.2019	2019	1875.75	XIPKRO-04CA06A1-10V19	Xiphopenaeus kroyeri	Xipkro	77	20	M	3.3
CV	Externa	6	1	5	01.05.2019	2019	1875.75	XIPKRO-05CA06A1-10V19	Xiphopenaeus kroyeri	Xipkro	74	18	M	2.58
CV	Externa	6	1	5	01.05.2019	2019	1875.75	XIPKRO-06CA06A1-10V19	Xiphopenaeus kroyeri	Xipkro	72	21	M	2.75
CV	Externa	6	2	5	01.05.2019	2019	1568.25	XIPKRO-01CA06A2-10V19	Xiphopenaeus kroyeri	Xipkro	79	17	M	13.47
CV	Externa	6	2	5	01.05.2019	2019	1568.25	XIPKRO-02CA06A2-10V19	Xiphopenaeus kroyeri	Xipkro	76	16	M	3.95
CV	Externa	6	2	5	01.05.2019	2019	1568.25	XIPKRO-03CA06A2-10V19	Xiphopenaeus kroyeri	Xipkro	80	16	M	3.78
CV	Externa	6	2	5	01.05.2019	2019	1568.25	XIPKRO-04CA06A2-10V19	Xiphopenaeus kroyeri	Xipkro	86	19	M	4.27
CV	Externa	6	2	5	01.05.2019	2019	1568.25	XIPKRO-05CA06A2-10V19	Xiphopenaeus kroyeri	Xipkro	70	16	M	3.83
CV	Externa	6	2	5	01.05.2019	2019	1568.25	XIPKRO-06CA06A2-10V19	Xiphopenaeus kroyeri	Xipkro	70	15	M	2.29
CV	Externa	6	2	5	01.05.2019	2019	1568.25	XIPKRO-07CA06A2-10V19	Xiphopenaeus kroyeri	Xipkro	77	21	M	4.58
CV	Externa	6	2	5	01.05.2019	2019	1568.25	XIPKRO-08CA06A2-10V19	Xiphopenaeus kroyeri	Xipkro	98	22	F	5.8
CV	Externa	6	2	5	01.05.2019	2019	1568.25	XIPKRO-09CA06A2-10V19	Xiphopenaeus kroyeri	Xipkro	73	16	M	2.46
CV	Externa	6	2	5	01.05.2019	2019	1568.25	XIPKRO-10CA06A2-10V19	Xiphopenaeus kroyeri	Xipkro	56	10	F	1.09
CV	Externa	6	2	5	01.05.2019	2019	1568.25	XIPKRO-11CA06A2-10V19	Xiphopenaeus kroyeri	Xipkro	75	17	M	2.83
CV	Externa	6	2	5	01.05.2019	2019	1568.25	XIPKRO-12CA06A2-10V19	Xiphopenaeus kroyeri	Xipkro	80	17	M	3.72
CV	Externa	6	2	5	01.05.2019	2019	1568.25	XIPKRO-13CA06A2-10V19	Xiphopenaeus kroyeri	Xipkro	59	12	F	1.16
CV	Externa	6	2	5	01.05.2019	2019	1568.25	XIPKRO-14CA06A2-10V19	Xiphopenaeus kroyeri	Xipkro	85	19	M	4.48
CV	Externa	6	2	5	01.05.2019	2019	1568.25	XIPKRO-15CA06A2-10V19	Xiphopenaeus kroyeri	Xipkro	87	20	F	4.6
CV	Externa	6	2	5	01.05.2019	2019	1568.25	XIPKRO-16CA06A2-10V19	Xiphopenaeus kroyeri	Xipkro	77	14	F	2.84
CV	Externa	6	2	5	01.05.2019	2019	1568.25	XIPKRO-17CA06A2-10V19	Xiphopenaeus kroyeri	Xipkro	80	20	F	4.08
CV	Externa	6	2	5	01.05.2019	2019	1568.25	XIPKRO-18CA06A2-10V19	Xiphopenaeus kroyeri	Xipkro	72	17	M	2.61
CV	Externa	6	2	5	01.05.2019	2019	1568.25	XIPKRO-19CA06A2-10V19	Xiphopenaeus kroyeri	Xipkro	79	17	M	2.98
CV	Externa	6	2	5	01.05.2019	2019	1568.25	XIPKRO-20CA06A2-10V19	Xiphopenaeus kroyeri	Xipkro	81	20	F	3.98
CV	Externa	6	2	5	01.05.2019	2019	1568.25	XIPKRO-21CA06A2-10V19	Xiphopenaeus kroyeri	Xipkro	74	14	M	2.59
CV	Externa	6	2	5	01.05.2019	2019	1568.25	XIPKRO-22CA06A2-10V19	Xiphopenaeus kroyeri	Xipkro	68	15	M	2.11
CV	Externa	6	2	5	01.05.2019	2019	1568.25	XIPKRO-23CA06A2-10V19	Xiphopenaeus kroyeri	Xipkro	74	14	M	2.48
CV	Externa	6	2	5	01.05.2019	2019	1568.25	XIPKRO-24CA06A2-10V19	Xiphopenaeus kroyeri	Xipkro	85	17	M	4.14
CV	Externa	6	2	5	01.05.2019	2019	1568.25	XIPKRO-25CA06A2-10V19	Xiphopenaeus kroyeri	Xipkro	70	14	F	1.8
CV	Externa	6	2	5	01.05.2019	2019	1568.25	XIPKRO-26CA06A2-10V19	Xiphopenaeus kroyeri	Xipkro	61	13	F	1.31
CV	Externa	6	2	5	01.05.2019	2019	1568.25	XIPKRO-27CA06A2-10V19	Xiphopenaeus kroyeri	Xipkro	76	16	M	2.34
CV	Externa	6	2	5	01.05.2019	2019	1568.25	XIPKRO-28CA06A2-10V19	Xiphopenaeus kroyeri	Xipkro	80	15	M	3.2
CV	Externa	6	2	5	01.05.2019	2019	1568.25	XIPKRO-29CA06A2-10V19	Xiphopenaeus kroyeri	Xipkro	78	16	M	2.86
CV	Externa	6	2	5	01.05.2019	2019	1568.25	XIPKRO-30CA06A2-10V19	Xiphopenaeus kroyeri	Xipkro	74	16	M	2.72
CV	Externa	6	2	5	01.05.2019	2019	1568.25		Xiphopenaeus kroyeri	Xipkro				125
CV	Externa	6	3	5	01.05.2019	2019	2029.5	XIPKRO-01CA06A3-10V19	Xiphopenaeus kroyeri	Xipkro	65	26	M	1.96
CV	Externa	6	3	5	01.05.2019	2019	2029.5	XIPKRO-02CA06A3-10V19	Xiphopenaeus kroyeri	Xipkro	68	20	M	2.05
CV	Externa	6	3	5	01.05.2019	2019	2029.5	XIPKRO-03CA06A3-10V19	Xiphopenaeus kroyeri	Xipkro	76	15	M	2.8
CV	Externa	6	3	5	01.05.2019	2019	2029.5	XIPKRO-04CA06A3-10V19	Xiphopenaeus kroyeri	Xipkro	80	20	M	4.16
CV	Externa	6	3	5	01.05.2019	2019	2029.5	XIPKRO-05CA06A3-10V19	Xiphopenaeus kroyeri	Xipkro	69	15	M	2.99
CV	Externa	6	3	5	01.05.2019	2019	2029.5	XIPKRO-06CA06A3-10V19	Xiphopenaeus kroyeri	Xipkro	65	16	M	2.58
CV	Externa	6	3	5	01.05.2019	2019	2029.5	XIPKRO-07CA06A3-10V19	Xiphopenaeus kroyeri	Xipkro	77	16	F	3.1
CV	Externa	6	3	5	01.05.2019	2019	2029.5	XIPKRO-08CA06A3-10V19	Xiphopenaeus kroyeri	Xipkro	77	20	M	3.07
CV	Externa	6	3	5	01.05.2019	2019	2029.5	XIPKRO-09CA06A3-10V19	Xiphopenaeus kroyeri	Xipkro	81	19	F	3
CV	Externa	6	3	5	01.05.2019	2019	2029.5	XIPKRO-10CA06A3-10V19	Xiphopenaeus kroyeri	Xipkro	72	19	F	4.12
CV	Externa	6	3	5	01.05.2019	2019	2029.5	XIPKRO-11CA06A3-10V19	Xiphopenaeus kroyeri	Xipkro	75	23	M	2.61
CV	Externa	6	3	5	01.05.2019	2019	2029.5	XIPKRO-12CA06A3-10V19	Xiphopenaeus kroyeri	Xipkro	85	21	M	4.42
CV	Externa	6	3	5	01.05.2019	2019	2029.5	XIPKRO-13CA06A3-10V19	Xiphopenaeus kroyeri	Xipkro	75	16	M	3.59
CV	Externa	6	3	5	01.05.2019	2019	2029.5	XIPKRO-14CA06A3-10V19	Xiphopenaeus kroyeri	Xipkro	77	20	M	2.76
CV	Externa	6	3	5	01.05.2019	2019	2029.5	XIPKRO-15CA06A3-10V19	Xiphopenaeus kroyeri	Xipkro	75	21	M	3.29
CV	Externa	6	3	5	01.05.2019	2019	2029.5	XIPKRO-16CA06A3-10V19	Xiphopenaeus kroyeri	Xipkro	77	19	F	2.37
CV	Externa	6	3	5	01.05.2019	2019	2029.5	XIPKRO-17CA06A3-10V19	Xiphopenaeus kroyeri	Xipkro	68	18	F	1.96
CV	Externa	6	3	5	01.05.2019	2019	2029.5	XIPKRO-18CA06A3-10V19	Xiphopenaeus kroyeri	Xipkro	84	18	M	4.06
CV	Externa	6	3	5	01.05.2019	2019	2029.5	XIPKRO-19CA06A3-10V19	Xiphopenaeus kroyeri	Xipkro	81	23	M	4.14
CV	Externa	6	3	5	01.05.2019	2019	2029.5	XIPKRO-20CA06A3-10V19	Xiphopenaeus kroyeri	Xipkro	70	16	F	2.32
CV	Externa	6	3	5	01.05.2019	2019	2029.5	XIPKRO-21CA06A3-10V19	Xiphopenaeus kroyeri	Xipkro	71	16	M	2.17
CV	Externa	6	3	5	01.05.2019	2019	2029.5	XIPKRO-22CA06A3-10V19	Xiphopenaeus kroyeri	Xipkro	72	22	M	2.6
CV	Externa	6	3	5	01.05.2019	2019	2029.5	XIPKRO-23CA06A3-10V19	Xiphopenaeus kroyeri	Xipkro	81	15	F	3.3
CV	Externa	6	3	5	01.05.2019	2019	2029.5	XIPKRO-24CA06A3-10V19	Xiphopenaeus kroyeri	Xipkro	86	22	M	4.9
CV	Externa	6	3	5	01.05.2019	2019	2029.5	XIPKRO-25CA06A3-10V19	Xiphopenaeus kroyeri	Xipkro	81	20	M	3.68
CV	Externa	6	3	5	01.05.2019	2019	2029.5	XIPKRO-26CA06A3-10V19	Xiphopenaeus kroyeri	Xipkro	70	23	M	2.02
CV	Externa	6	3	5	01.05.2019	2019	2029.5	XIPKRO-27CA06A3-10V19	Xiphopenaeus kroyeri	Xipkro	78	22	F	2.96
CV	Externa	6	3	5	01.05.2019	2019	2029.5	XIPKRO-28CA06A3-10V19	Xiphopenaeus kroyeri	Xipkro	84	17	F	3.22
CV	Externa	6	3	5	01.05.2019	2019	2029.5	XIPKRO-29CA06A3-10V19	Xiphopenaeus kroyeri	Xipkro	63	13	F	1.44
CV	Externa	6	3	5	01.05.2019	2019	2029.5	XIPKRO-30CA06A3-10V19	Xiphopenaeus kroyeri	Xipkro	62	16	M	1.47
CV	Externa	6	3	5	01.05.2019	2019	2029.5		Xiphopenaeus kroyeri	Xipkro				369.03
IP	Externa	3	1	5	01.05.2019	2019	1173.62	XIPKRO-01IP03A1-09V19	Xiphopenaeus kroyeri	Xipkro	85	22	M	4.12
IP	Externa	3	1	5	01.05.2019	2019	1173.62	XIPKRO-02IP03A1-09V19	Xiphopenaeus kroyeri	Xipkro	99	23	M	6.18
IP	Externa	3	1	5	01.05.2019	2019	1173.62	XIPKRO-03IP03A1-09V19	Xiphopenaeus kroyeri	Xipkro	85	19	F	3.26
IP	Externa	3	1	5	01.05.2019	2019	1173.62	XIPKRO-04IP03A1-09V19	Xiphopenaeus kroyeri	Xipkro	101	25	M	5.57
IP	Externa	3	1	5	01.05.2019	2019	1173.62	XIPKRO-05IP03A1-09V19	Xiphopenaeus kroyeri	Xipkro	107	28	F	8.38
IP	Externa	3	1	5	01.05.2019	2019	1173.62	XIPKRO-06IP03A1-09V19	Xiphopenaeus kroyeri	Xipkro	85	19	M	3.39
IP	Externa	3	1	5	01.05.2019	2019	1173.62	XIPKRO-07IP03A1-09V19	Xiphopenaeus kroyeri	Xipkro	71	19	M	2.12
IP	Externa	3	1	5	01.05.2019	2019	1173.62	XIPKRO-08IP03A1-09V19	Xiphopenaeus kroyeri	Xipkro	79	19	M	2.75
IP	Externa	3	1	5	01.05.2019	2019	1173.62	XIPKRO-09IP03A1-09V19	Xiphopenaeus kroyeri	Xipkro	80	19	F	2.75
IP	Externa	3	1	5	01.05.2019	2019	1173.62	XIPKRO-10IP03A1-09V19	Xiphopenaeus kroyeri	Xipkro	77	18	M	2.61
IP	Externa	3	1	5	01.05.2019	2019	1173.62	XIPKRO-11IP03A1-09V19	Xiphopenaeus kroyeri	Xipkro	90	20	M	4.33
IP	Externa	3	1	5	01.05.2019	2019	1173.62	XIPKRO-12IP03A1-09V19	Xiphopenaeus kroyeri	Xipkro	75	18	F	2.78
IP	Externa	3	1	5	01.05.2019	2019	1173.62	XIPKRO-13IP03A1-09V19	Xiphopenaeus kroyeri	Xipkro	76	17	M	2.16
IP	Externa	3	1	5	01.05.2019	2019	1173.62	XIPKRO-14IP03A1-09V19	Xiphopenaeus kroyeri	Xipkro	81	20	M	3.17
IP	Externa	3	1	5	01.05.2019	2019	1173.62	XIPKRO-15IP03A1-09V19	Xiphopenaeus kroyeri	Xipkro	77	17	M	3.12
IP	Externa	3	1	5	01.05.2019	2019	1173.62	XIPKRO-16IP03A1-09V19	Xiphopenaeus kroyeri	Xipkro	73	14	M	2.41
IP	Externa	3	1	5	01.05.2019	2019	1173.62	XIPKRO-17IP03A1-09V19	Xiphopenaeus kroyeri	Xipkro	90	19	M	4.6
IP	Externa	3	1	5	01.05.2019	2019	1173.62	XIPKRO-18IP03A1-09V19	Xiphopenaeus kroyeri	Xipkro	71	18	M	2.37
IP	Externa	3	1	5	01.05.2019	2019	1173.62	XIPKRO-19IP03A1-09V19	Xiphopenaeus kroyeri	Xipkro	60	14	F	1.67
IP	Externa	3	1	5	01.05.2019	2019	1173.62	XIPKRO-20IP03A1-09V19	Xiphopenaeus kroyeri	Xipkro	54	12	F	1.12
IP	Externa	3	1	5	01.05.2019	2019	1173.62	XIPKRO-21IP03A1-09V19	Xiphopenaeus kroyeri	Xipkro	75	17	M	2.28
IP	Externa	3	1	5	01.05.2019	2019	1173.62	XIPKRO-22IP03A1-09V19	Xiphopenaeus kroyeri	Xipkro	76	19	F	2.29
IP	Externa	3	1	5	01.05.2019	2019	1173.62	XIPKRO-23IP03A1-09V19	Xiphopenaeus kroyeri	Xipkro	110	30	F	9.83
IP	Externa	3	1	5	01.05.2019	2019	1173.62	XIPKRO-24IP03A1-09V19	Xiphopenaeus kroyeri	Xipkro	52	14	F	0.9
IP	Externa	3	1	5	01.05.2019	2019	1173.62	XIPKRO-25IP03A1-09V19	Xiphopenaeus kroyeri	Xipkro	66	13	F	1.32
IP	Externa	3	1	5	01.05.2019	2019	1173.62	XIPKRO-26IP03A1-09V19	Xiphopenaeus kroyeri	Xipkro	59	9	F	0.78
IP	Externa	3	1	5	01.05.2019	2019	1173.62	XIPKRO-27IP03A1-09V19	Xiphopenaeus kroyeri	Xipkro	59	12	F	1.2
IP	Externa	3	1	5	01.05.2019	2019	1173.62	XIPKRO-28IP03A1-09V19	Xiphopenaeus kroyeri	Xipkro	63	12	F	1.35
IP	Externa	3	2	5	01.05.2019	2019	1440.12	XIPKRO-01IP03A2-09V19	Xiphopenaeus kroyeri	Xipkro	109	29	M	6.95
IP	Externa	3	2	5	01.05.2019	2019	1440.12	XIPKRO-02IP03A2-09V19	Xiphopenaeus kroyeri	Xipkro	81	17	M	2.5
IP	Externa	3	2	5	01.05.2019	2019	1440.12	XIPKRO-03IP03A2-09V19	Xiphopenaeus kroyeri	Xipkro	103	24	F	5.43
IP	Externa	3	2	5	01.05.2019	2019	1440.12	XIPKRO-04IP03A2-09V19	Xiphopenaeus kroyeri	Xipkro	79	27	F	2.28
IP	Externa	3	2	5	01.05.2019	2019	1440.12	XIPKRO-05IP03A2-09V19	Xiphopenaeus kroyeri	Xipkro	99	21	F	3.76
IP	Externa	3	2	5	01.05.2019	2019	1440.12	XIPKRO-06IP03A2-09V19	Xiphopenaeus kroyeri	Xipkro	104	25	F	5.21
IP	Externa	3	2	5	01.05.2019	2019	1440.12	XIPKRO-07IP03A2-09V19	Xiphopenaeus kroyeri	Xipkro	74	20	F	2.88
IP	Externa	3	2	5	01.05.2019	2019	1440.12	XIPKRO-08IP03A2-09V19	Xiphopenaeus kroyeri	Xipkro	74	18	M	1.73
IP	Externa	3	2	5	01.05.2019	2019	1440.12	XIPKRO-09IP03A2-09V19	Xiphopenaeus kroyeri	Xipkro	85	19	M	3.72
IP	Externa	3	2	5	01.05.2019	2019	1440.12	XIPKRO-10IP03A2-09V19	Xiphopenaeus kroyeri	Xipkro	83	20	M	3.23
IP	Externa	3	2	5	01.05.2019	2019	1440.12	XIPKRO-11IP03A2-09V19	Xiphopenaeus kroyeri	Xipkro	80	17	M	2.82
IP	Externa	3	2	5	01.05.2019	2019	1440.12	XIPKRO-12IP03A2-09V19	Xiphopenaeus kroyeri	Xipkro	71	17	F	2.03
IP	Externa	3	2	5	01.05.2019	2019	1440.12	XIPKRO-13IP03A2-09V19	Xiphopenaeus kroyeri	Xipkro	82	19	M	4.98
IP	Externa	3	2	5	01.05.2019	2019	1440.12	XIPKRO-14IP03A2-09V19	Xiphopenaeus kroyeri	Xipkro	86	19	F	3.21
IP	Externa	3	2	5	01.05.2019	2019	1440.12	XIPKRO-15IP03A2-09V19	Xiphopenaeus kroyeri	Xipkro	82	20	F	3.17
IP	Externa	3	2	5	01.05.2019	2019	1440.12	XIPKRO-16IP03A2-09V19	Xiphopenaeus kroyeri	Xipkro	94	19	M	4.54
IP	Externa	3	2	5	01.05.2019	2019	1440.12	XIPKRO-17IP03A2-09V19	Xiphopenaeus kroyeri	Xipkro	106	24	F	3.96
IP	Externa	3	2	5	01.05.2019	2019	1440.12	XIPKRO-18IP03A2-09V19	Xiphopenaeus kroyeri	Xipkro	118	29	F	8.1
IP	Externa	3	2	5	01.05.2019	2019	1440.12	XIPKRO-19IP03A2-09V19	Xiphopenaeus kroyeri	Xipkro	77	16	M	2.19
IP	Externa	3	2	5	01.05.2019	2019	1440.12	XIPKRO-20IP03A2-09V19	Xiphopenaeus kroyeri	Xipkro	77	16	M	2.39
IP	Externa	3	2	5	01.05.2019	2019	1440.12	XIPKRO-21IP03A2-09V19	Xiphopenaeus kroyeri	Xipkro	80	19	M	2.82
IP	Externa	3	2	5	01.05.2019	2019	1440.12	XIPKRO-22IP03A2-09V19	Xiphopenaeus kroyeri	Xipkro	91	19	F	3.36
IP	Externa	3	2	5	01.05.2019	2019	1440.12	XIPKRO-23IP03A2-09V19	Xiphopenaeus kroyeri	Xipkro	80	19	F	2.84
IP	Externa	3	2	5	01.05.2019	2019	1440.12	XIPKRO-24IP03A2-09V19	Xiphopenaeus kroyeri	Xipkro	75	17	M	2.05
IP	Externa	3	2	5	01.05.2019	2019	1440.12	XIPKRO-25IP03A2-09V19	Xiphopenaeus kroyeri	Xipkro	48	11	F	0.75
IP	Externa	3	2	5	01.05.2019	2019	1440.12	XIPKRO-26IP03A2-09V19	Xiphopenaeus kroyeri	Xipkro	80	18	M	3.59
IP	Externa	3	2	5	01.05.2019	2019	1440.12	XIPKRO-27IP03A2-09V19	Xiphopenaeus kroyeri	Xipkro	85	19	M	3.53
IP	Externa	3	2	5	01.05.2019	2019	1440.12	XIPKRO-28IP03A2-09V19	Xiphopenaeus kroyeri	Xipkro	93	23	F	3.6
IP	Externa	3	2	5	01.05.2019	2019	1440.12	XIPKRO-29IP03A2-09V19	Xiphopenaeus kroyeri	Xipkro	80	20	M	3.33
IP	Externa	3	2	5	01.05.2019	2019	1440.12	XIPKRO-30IP03A2-09V19	Xiphopenaeus kroyeri	Xipkro	70	18	M	1.86
IP	Externa	3	2	5	01.05.2019	2019	1440.12		Xiphopenaeus kroyeri	Xipkro				109.97
IP	Externa	4	1	5	01.05.2019	2019	1050.62	XIPKRO-01IP04A1-09V19	Xiphopenaeus kroyeri	Xipkro	68	13	M	1.67
IP	Externa	4	1	5	01.05.2019	2019	1050.62	XIPKRO-02IP04A1-09V19	Xiphopenaeus kroyeri	Xipkro	83	17	F	3.69
IP	Externa	4	1	5	01.05.2019	2019	1050.62	XIPKRO-03IP04A1-09V19	Xiphopenaeus kroyeri	Xipkro	75	16	M	2.3
IP	Externa	4	1	5	01.05.2019	2019	1050.62	XIPKRO-04IP04A1-09V19	Xiphopenaeus kroyeri	Xipkro	68	14	F	1.58
IP	Externa	4	1	5	01.05.2019	2019	1050.62	XIPKRO-05IP04A1-09V19	Xiphopenaeus kroyeri	Xipkro	72	14	M	2.08
IP	Externa	4	1	5	01.05.2019	2019	1050.62	XIPKRO-06IP04A1-09V19	Xiphopenaeus kroyeri	Xipkro	68	13	M	1.73
IP	Externa	4	1	5	01.05.2019	2019	1050.62	XIPKRO-07IP04A1-09V19	Xiphopenaeus kroyeri	Xipkro	88	18	M	4.39
IP	Externa	4	1	5	01.05.2019	2019	1050.62	XIPKRO-08IP04A1-09V19	Xiphopenaeus kroyeri	Xipkro	58	11	M	1.2
IP	Externa	4	1	5	01.05.2019	2019	1050.62	XIPKRO-09IP04A1-09V19	Xiphopenaeus kroyeri	Xipkro	62	12	F	1.16
IP	Externa	4	1	5	01.05.2019	2019	1050.62	XIPKRO-10IP04A1-09V19	Xiphopenaeus kroyeri	Xipkro	72	14	M	1.87
IP	Externa	4	1	5	01.05.2019	2019	1050.62	XIPKRO-11IP04A1-09V19	Xiphopenaeus kroyeri	Xipkro	82	16	F	3.93
IP	Externa	4	1	5	01.05.2019	2019	1050.62	XIPKRO-12IP04A1-09V19	Xiphopenaeus kroyeri	Xipkro	68	13	M	1.43
IP	Externa	4	1	5	01.05.2019	2019	1050.62	XIPKRO-13IP04A1-09V19	Xiphopenaeus kroyeri	Xipkro	78	15	M	2.67
IP	Externa	4	1	5	01.05.2019	2019	1050.62	XIPKRO-14IP04A1-09V19	Xiphopenaeus kroyeri	Xipkro	75	14	M	2.03
IP	Externa	4	1	5	01.05.2019	2019	1050.62	XIPKRO-15IP04A1-09V19	Xiphopenaeus kroyeri	Xipkro	65	12	M	1.54
IP	Externa	4	1	5	01.05.2019	2019	1050.62	XIPKRO-16IP04A1-09V19	Xiphopenaeus kroyeri	Xipkro	70	15	M	2.01
IP	Externa	4	1	5	01.05.2019	2019	1050.62	XIPKRO-17IP04A1-09V19	Xiphopenaeus kroyeri	Xipkro	61	13	M	1.11
IP	Externa	4	1	5	01.05.2019	2019	1050.62	XIPKRO-18IP04A1-09V19	Xiphopenaeus kroyeri	Xipkro	75	15	M	2.18
IP	Externa	4	1	5	01.05.2019	2019	1050.62	XIPKRO-19IP04A1-09V19	Xiphopenaeus kroyeri	Xipkro	60	10	M	1.15
IP	Externa	4	1	5	01.05.2019	2019	1050.62	XIPKRO-20IP04A1-09V19	Xiphopenaeus kroyeri	Xipkro	66	12	M	1.44
IP	Externa	4	1	5	01.05.2019	2019	1050.62	XIPKRO-21IP04A1-09V19	Xiphopenaeus kroyeri	Xipkro	77	15	F	2.06
IP	Externa	4	1	5	01.05.2019	2019	1050.62	XIPKRO-22IP04A1-09V19	Xiphopenaeus kroyeri	Xipkro	73	13	M	2.23
IP	Externa	4	1	5	01.05.2019	2019	1050.62	XIPKRO-23IP04A1-09V19	Xiphopenaeus kroyeri	Xipkro	82	15	F	2.78
IP	Externa	4	1	5	01.05.2019	2019	1050.62	XIPKRO-24IP04A1-09V19	Xiphopenaeus kroyeri	Xipkro	80	16	M	2.65
IP	Externa	4	1	5	01.05.2019	2019	1050.62	XIPKRO-25IP04A1-09V19	Xiphopenaeus kroyeri	Xipkro	67	12	M	1.49
IP	Externa	4	1	5	01.05.2019	2019	1050.62	XIPKRO-26IP04A1-09V19	Xiphopenaeus kroyeri	Xipkro	68	14	M	2.08
IP	Externa	4	1	5	01.05.2019	2019	1050.62	XIPKRO-27IP04A1-09V19	Xiphopenaeus kroyeri	Xipkro	72	12	F	1.84
IP	Externa	4	1	5	01.05.2019	2019	1050.62	XIPKRO-28IP04A1-09V19	Xiphopenaeus kroyeri	Xipkro	81	14	M	2.68
IP	Externa	4	1	5	01.05.2019	2019	1050.62	XIPKRO-29IP04A1-09V19	Xiphopenaeus kroyeri	Xipkro	95	20	F	5.2
IP	Externa	4	1	5	01.05.2019	2019	1050.62		Xiphopenaeus kroyeri	Xipkro				12.5235
IP	Externa	4	2	5	01.05.2019	2019	1137.75	XIPKRO-01IP04A2-09V19	Xiphopenaeus kroyeri	Xipkro	46	11	F	1.19
IP	Externa	4	2	5	01.05.2019	2019	1137.75	XIPKRO-02IP04A2-09V19	Xiphopenaeus kroyeri	Xipkro	46	12	M	1.37
IP	Externa	4	2	5	01.05.2019	2019	1137.75	XIPKRO-03IP04A2-09V19	Xiphopenaeus kroyeri	Xipkro	73	18	F	2.43
IP	Externa	4	2	5	01.05.2019	2019	1137.75	XIPKRO-04IP04A2-09V19	Xiphopenaeus kroyeri	Xipkro	63	15	M	1.36
IP	Externa	4	2	5	01.05.2019	2019	1137.75	XIPKRO-05IP04A2-09V19	Xiphopenaeus kroyeri	Xipkro	62	15	M	1.61
IP	Externa	4	2	5	01.05.2019	2019	1137.75	XIPKRO-06IP04A2-09V19	Xiphopenaeus kroyeri	Xipkro	54	12	M	1.29
IP	Externa	4	2	5	01.05.2019	2019	1137.75	XIPKRO-07IP04A2-09V19	Xiphopenaeus kroyeri	Xipkro	67	19	M	2.22
IP	Externa	4	2	5	01.05.2019	2019	1137.75	XIPKRO-08IP04A2-09V19	Xiphopenaeus kroyeri	Xipkro	56	10	M	0.94
IP	Externa	4	2	5	01.05.2019	2019	1137.75	XIPKRO-09IP04A2-09V19	Xiphopenaeus kroyeri	Xipkro	61	13	F	1.68
IP	Externa	4	2	5	01.05.2019	2019	1137.75	XIPKRO-10IP04A2-09V19	Xiphopenaeus kroyeri	Xipkro	69	17	M	1.98
IP	Externa	4	2	5	01.05.2019	2019	1137.75	XIPKRO-11IP04A2-09V19	Xiphopenaeus kroyeri	Xipkro	58	13	F	0.96
IP	Externa	4	2	5	01.05.2019	2019	1137.75	XIPKRO-12IP04A2-09V19	Xiphopenaeus kroyeri	Xipkro	54	16	M	2.57
IP	Externa	4	2	5	01.05.2019	2019	1137.75	XIPKRO-13IP04A2-09V19	Xiphopenaeus kroyeri	Xipkro	60	17	M	2.25
IP	Externa	4	2	5	01.05.2019	2019	1137.75	XIPKRO-14IP04A2-09V19	Xiphopenaeus kroyeri	Xipkro	58	13	M	1.15
IP	Externa	4	2	5	01.05.2019	2019	1137.75	XIPKRO-15IP04A2-09V19	Xiphopenaeus kroyeri	Xipkro	53	13	M	1.16
IP	Externa	4	2	5	01.05.2019	2019	1137.75	XIPKRO-16IP04A2-09V19	Xiphopenaeus kroyeri	Xipkro	79	21	F	3.92
IP	Externa	4	2	5	01.05.2019	2019	1137.75	XIPKRO-17IP04A2-09V19	Xiphopenaeus kroyeri	Xipkro	70	17	F	1.95
IP	Externa	4	2	5	01.05.2019	2019	1137.75	XIPKRO-18IP04A2-09V19	Xiphopenaeus kroyeri	Xipkro	69	17	M	1.65
IP	Externa	4	2	5	01.05.2019	2019	1137.75	XIPKRO-19IP04A2-09V19	Xiphopenaeus kroyeri	Xipkro	71	17	F	2
IP	Externa	4	2	5	01.05.2019	2019	1137.75	XIPKRO-20IP04A2-09V19	Xiphopenaeus kroyeri	Xipkro	56	11	F	1.44
IP	Externa	4	2	5	01.05.2019	2019	1137.75	XIPKRO-21IP04A2-09V19	Xiphopenaeus kroyeri	Xipkro	57	17	F	1.55
IP	Externa	4	2	5	01.05.2019	2019	1137.75	XIPKRO-22IP04A2-09V19	Xiphopenaeus kroyeri	Xipkro	51	15	M	0.89
IP	Externa	4	2	5	01.05.2019	2019	1137.75	XIPKRO-23IP04A2-09V19	Xiphopenaeus kroyeri	Xipkro	44	12	M	0.86
IP	Externa	4	2	5	01.05.2019	2019	1137.75	XIPKRO-24IP04A2-09V19	Xiphopenaeus kroyeri	Xipkro	53	16	M	1.23
IP	Externa	4	2	5	01.05.2019	2019	1137.75	XIPKRO-25IP04A2-09V19	Xiphopenaeus kroyeri	Xipkro	54	13	F	1.51
IP	Externa	4	2	5	01.05.2019	2019	1137.75	XIPKRO-26IP04A2-09V19	Xiphopenaeus kroyeri	Xipkro	71	18	M	2.51
IP	Externa	4	2	5	01.05.2019	2019	1137.75	XIPKRO-27IP04A2-09V19	Xiphopenaeus kroyeri	Xipkro	50	12	M	0.81
IP	Externa	4	2	5	01.05.2019	2019	1137.75	XIPKRO-28IP04A2-09V19	Xiphopenaeus kroyeri	Xipkro	56	20	M	1.44
IP	Externa	4	2	5	01.05.2019	2019	1137.75	XIPKRO-29IP04A2-09V19	Xiphopenaeus kroyeri	Xipkro	46	13	M	0.95
IP	Externa	4	2	5	01.05.2019	2019	1137.75	XIPKRO-30IP04A2-09V19	Xiphopenaeus kroyeri	Xipkro	50	13	F	0.81
IP	Externa	4	2	5	01.05.2019	2019	1137.75		Xiphopenaeus kroyeri	Xipkro				97.89
IP	Externa	5	1	5	01.05.2019	2019	1496.5	XIPKRO-01IP05A1-09V19	Xiphopenaeus kroyeri	Xipkro	64	13	M	1.59
IP	Externa	5	1	5	01.05.2019	2019	1496.5	XIPKRO-02IP05A1-09V19	Xiphopenaeus kroyeri	Xipkro	64	13	M	1.54
IP	Externa	5	1	5	01.05.2019	2019	1496.5	XIPKRO-03IP05A1-09V19	Xiphopenaeus kroyeri	Xipkro	62	12	M	1.25
IP	Externa	5	1	5	01.05.2019	2019	1496.5	XIPKRO-04IP05A1-09V19	Xiphopenaeus kroyeri	Xipkro	64	12	M	1.22
IP	Externa	5	1	5	01.05.2019	2019	1496.5	XIPKRO-05IP05A1-09V19	Xiphopenaeus kroyeri	Xipkro	77	14	F	2.35
IP	Externa	5	2	5	01.05.2019	2019	1066	XIPKRO-01IP05A2-09V19	Xiphopenaeus kroyeri	Xipkro	80	13	M	2.56
IP	Externa	5	2	5	01.05.2019	2019	1066	XIPKRO-02IP05A2-09V19	Xiphopenaeus kroyeri	Xipkro	85	17	F	3.15
IP	Externa	5	2	5	01.05.2019	2019	1066	XIPKRO-03IP05A2-09V19	Xiphopenaeus kroyeri	Xipkro	104	21	F	6.32
IP	Externa	5	2	5	01.05.2019	2019	1066	XIPKRO-04IP05A2-09V19	Xiphopenaeus kroyeri	Xipkro	82	16	F	3.11
IP	Externa	5	2	5	01.05.2019	2019	1066	XIPKRO-05IP05A2-09V19	Xiphopenaeus kroyeri	Xipkro	72	15	M	2.76
IP	Externa	5	2	5	01.05.2019	2019	1066	XIPKRO-06IP05A2-09V19	Xiphopenaeus kroyeri	Xipkro	99	18	F	5.19
IP	Externa	5	2	5	01.05.2019	2019	1066	XIPKRO-07IP05A2-09V19	Xiphopenaeus kroyeri	Xipkro	87	16	F	3.88
IP	Externa	5	2	5	01.05.2019	2019	1066	XIPKRO-08IP05A2-09V19	Xiphopenaeus kroyeri	Xipkro	92	18	F	4.67
IP	Externa	5	2	5	01.05.2019	2019	1066	XIPKRO-09IP05A2-09V19	Xiphopenaeus kroyeri	Xipkro	79	15	F	3.54
IP	Externa	5	2	5	01.05.2019	2019	1066	XIPKRO-10IP05A2-09V19	Xiphopenaeus kroyeri	Xipkro	77	14	M	2.51
IP	Externa	5	2	5	01.05.2019	2019	1066	XIPKRO-11IP05A2-09V19	Xiphopenaeus kroyeri	Xipkro	105	21	F	6.59
IP	Externa	5	2	5	01.05.2019	2019	1066	XIPKRO-12IP05A2-09V19	Xiphopenaeus kroyeri	Xipkro	71	13	M	2.02
IP	Externa	5	2	5	01.05.2019	2019	1066	XIPKRO-13IP05A2-09V19	Xiphopenaeus kroyeri	Xipkro	96	21	F	5.43
IP	Externa	5	2	5	01.05.2019	2019	1066	XIPKRO-14IP05A2-09V19	Xiphopenaeus kroyeri	Xipkro	75	14	M	2.56
IP	Externa	5	2	5	01.05.2019	2019	1066	XIPKRO-15IP05A2-09V19	Xiphopenaeus kroyeri	Xipkro	64	12	M	1.48
IP	Externa	5	2	5	01.05.2019	2019	1066	XIPKRO-16IP05A2-09V19	Xiphopenaeus kroyeri	Xipkro	59	11	F	1.12
IP	Externa	5	2	5	01.05.2019	2019	1066	XIPKRO-17IP05A2-09V19	Xiphopenaeus kroyeri	Xipkro	76	14	M	2.4
IP	Externa	5	2	5	01.05.2019	2019	1066	XIPKRO-18IP05A2-09V19	Xiphopenaeus kroyeri	Xipkro	65	12	F	1.73
IP	Externa	5	2	5	01.05.2019	2019	1066	XIPKRO-19IP05A2-09V19	Xiphopenaeus kroyeri	Xipkro	66	14	M	1.66
IP	Externa	5	2	5	01.05.2019	2019	1066	XIPKRO-20IP05A2-09V19	Xiphopenaeus kroyeri	Xipkro	60	9	F	1.48
IP	Externa	5	2	5	01.05.2019	2019	1066	XIPKRO-21IP05A2-09V19	Xiphopenaeus kroyeri	Xipkro	96	24	F	5.79
IP	Externa	5	2	5	01.05.2019	2019	1066	XIPKRO-22IP05A2-09V19	Xiphopenaeus kroyeri	Xipkro	95	22	F	5.1
IP	Externa	5	2	5	01.05.2019	2019	1066	XIPKRO-23IP05A2-09V19	Xiphopenaeus kroyeri	Xipkro	97	25	F	6.28
IP	Externa	5	2	5	01.05.2019	2019	1066	XIPKRO-24IP05A2-09V19	Xiphopenaeus kroyeri	Xipkro	62	14	F	1.54
IP	Externa	5	2	5	01.05.2019	2019	1066	XIPKRO-25IP05A2-09V19	Xiphopenaeus kroyeri	Xipkro	58	15	F	1.86
IP	Externa	5	2	5	01.05.2019	2019	1066	XIPKRO-26IP05A2-09V19	Xiphopenaeus kroyeri	Xipkro	69	17	M	2.15
IP	Externa	6	1	5	01.05.2019	2019	1527.25	XIPKRO-01IP06A1-09V19	Xiphopenaeus kroyeri	Xipkro	90	18	M	4.77
IP	Externa	6	1	5	01.05.2019	2019	1527.25	XIPKRO-02IP06A1-09V19	Xiphopenaeus kroyeri	Xipkro	81	15	M	3.71
IP	Externa	6	1	5	01.05.2019	2019	1527.25	XIPKRO-03IP06A1-09V19	Xiphopenaeus kroyeri	Xipkro	70	13	M	1.86
IP	Externa	6	1	5	01.05.2019	2019	1527.25	XIPKRO-04IP06A1-09V19	Xiphopenaeus kroyeri	Xipkro	83	17	M	3.54
IP	Externa	6	1	5	01.05.2019	2019	1527.25	XIPKRO-05IP06A1-09V19	Xiphopenaeus kroyeri	Xipkro	104	21	F	7.34
IP	Externa	6	1	5	01.05.2019	2019	1527.25	XIPKRO-06IP06A1-09V19	Xiphopenaeus kroyeri	Xipkro	69	13	M	1.94
IP	Externa	6	1	5	01.05.2019	2019	1527.25	XIPKRO-07IP06A1-09V19	Xiphopenaeus kroyeri	Xipkro	73	13	F	1.98
IP	Externa	6	1	5	01.05.2019	2019	1527.25	XIPKRO-08IP06A1-09V19	Xiphopenaeus kroyeri	Xipkro	90	18	F	4.83
IP	Externa	6	1	5	01.05.2019	2019	1527.25	XIPKRO-09IP06A1-09V19	Xiphopenaeus kroyeri	Xipkro	77	14	F	2.8
IP	Externa	6	1	5	01.05.2019	2019	1527.25	XIPKRO-10IP06A1-09V19	Xiphopenaeus kroyeri	Xipkro	71	15	F	2.18
IP	Externa	6	1	5	01.05.2019	2019	1527.25	XIPKRO-11IP06A1-09V19	Xiphopenaeus kroyeri	Xipkro	81	15	M	3.16
IP	Externa	6	1	5	01.05.2019	2019	1527.25	XIPKRO-12IP06A1-09V19	Xiphopenaeus kroyeri	Xipkro	96	18	F	4.72
IP	Externa	6	1	5	01.05.2019	2019	1527.25	XIPKRO-13IP06A1-09V19	Xiphopenaeus kroyeri	Xipkro	70	11	F	1.9
IP	Externa	6	1	5	01.05.2019	2019	1527.25	XIPKRO-14IP06A1-09V19	Xiphopenaeus kroyeri	Xipkro	84	16	M	3.34
IP	Externa	6	2	5	01.05.2019	2019	1675.88	XIPKRO-01IP06A2-09V19	Xiphopenaeus kroyeri	Xipkro	118	28	F	8.69
IP	Externa	6	2	5	01.05.2019	2019	1675.88	XIPKRO-02IP06A2-09V19	Xiphopenaeus kroyeri	Xipkro	87	19	F	3.42
IP	Externa	6	2	5	01.05.2019	2019	1675.88	XIPKRO-03IP06A2-09V19	Xiphopenaeus kroyeri	Xipkro	72	17	F	1.88
IP	Externa	6	2	5	01.05.2019	2019	1675.88	XIPKRO-04IP06A2-09V19	Xiphopenaeus kroyeri	Xipkro	70	34	M	1.83
IP	Externa	6	2	5	01.05.2019	2019	1675.88	XIPKRO-05IP06A2-09V19	Xiphopenaeus kroyeri	Xipkro	69	14	M	1.46
IP	Externa	6	2	5	01.05.2019	2019	1675.88	XIPKRO-06IP06A2-09V19	Xiphopenaeus kroyeri	Xipkro	63	14	M	1.16
IP	Externa	6	2	5	01.05.2019	2019	1675.88	XIPKRO-07IP06A2-09V19	Xiphopenaeus kroyeri	Xipkro	71	16	M	1.76
IP	Externa	6	2	5	01.05.2019	2019	1675.88	XIPKRO-08IP06A2-09V19	Xiphopenaeus kroyeri	Xipkro	96	23	F	5.21
IP	Externa	6	2	5	01.05.2019	2019	1675.88	XIPKRO-09IP06A2-09V19	Xiphopenaeus kroyeri	Xipkro	68	15	M	1.75
IP	Externa	6	2	5	01.05.2019	2019	1675.88	XIPKRO-10IP06A2-09V19	Xiphopenaeus kroyeri	Xipkro	98	23	F	4.38
IP	Externa	6	2	5	01.05.2019	2019	1675.88	XIPKRO-11IP06A2-09V19	Xiphopenaeus kroyeri	Xipkro	73	16	M	1.96
IP	Externa	6	2	5	01.05.2019	2019	1675.88	XIPKRO-12IP06A2-09V19	Xiphopenaeus kroyeri	Xipkro	61	13	M	1.03
IP	Externa	6	2	5	01.05.2019	2019	1675.88	XIPKRO-13IP06A2-09V19	Xiphopenaeus kroyeri	Xipkro	55	13	F	1.08
IP	Externa	6	2	5	01.05.2019	2019	1675.88	XIPKRO-14IP06A2-09V19	Xiphopenaeus kroyeri	Xipkro	69	15	M	1.48
IP	Externa	6	2	5	01.05.2019	2019	1675.88	XIPKRO-15IP06A2-09V19	Xiphopenaeus kroyeri	Xipkro	80	19	F	2.93
IP	Externa	6	2	5	01.05.2019	2019	1675.88	XIPKRO-16IP06A2-09V19	Xiphopenaeus kroyeri	Xipkro	60	14	F	1.34
IP	Externa	6	2	5	01.05.2019	2019	1675.88	XIPKRO-17IP06A2-09V19	Xiphopenaeus kroyeri	Xipkro	91	20	M	4.28
IP	Externa	6	2	5	01.05.2019	2019	1675.88	XIPKRO-18IP06A2-09V19	Xiphopenaeus kroyeri	Xipkro	64	15	F	1.28
IP	Externa	6	2	5	01.05.2019	2019	1675.88	XIPKRO-19IP06A2-09V19	Xiphopenaeus kroyeri	Xipkro	68	17	F	1.89
IP	Externa	6	2	5	01.05.2019	2019	1675.88	XIPKRO-20IP06A2-09V19	Xiphopenaeus kroyeri	Xipkro	81	20	F	3.11
IP	Externa	6	2	5	01.05.2019	2019	1675.88	XIPKRO-21IP06A2-09V19	Xiphopenaeus kroyeri	Xipkro	121	31	F	10.07
IP	Externa	6	2	5	01.05.2019	2019	1675.88	XIPKRO-22IP06A2-09V19	Xiphopenaeus kroyeri	Xipkro	87	22	F	3.88
IP	Externa	6	2	5	01.05.2019	2019	1675.88	XIPKRO-23IP06A2-09V19	Xiphopenaeus kroyeri	Xipkro	77	20	F	2.5
IP	Externa	6	2	5	01.05.2019	2019	1675.88	XIPKRO-24IP06A2-09V19	Xiphopenaeus kroyeri	Xipkro	77	26	M	2.29
IP	Externa	6	2	5	01.05.2019	2019	1675.88	XIPKRO-25IP06A2-09V19	Xiphopenaeus kroyeri	Xipkro	70	17	F	1.62
IP	Externa	6	2	5	01.05.2019	2019	1675.88	XIPKRO-26IP06A2-09V19	Xiphopenaeus kroyeri	Xipkro	74	17	M	2.37
IP	Externa	6	2	5	01.05.2019	2019	1675.88	XIPKRO-27IP06A2-09V19	Xiphopenaeus kroyeri	Xipkro	87	20	F	2.95
IP	Externa	6	2	5	01.05.2019	2019	1675.88	XIPKRO-28IP06A2-09V19	Xiphopenaeus kroyeri	Xipkro	88	20	M	3.8
IP	Externa	6	2	5	01.05.2019	2019	1675.88		Xiphopenaeus kroyeri	Xipkro				52.33
IP	Externa	6	2	5	01.05.2019	2019	1675.88	XIPKRO-55IP06A2-09V19	Xiphopenaeus kroyeri	Xipkro	43	12	M	0.29
IP	Externa	6	2	5	01.05.2019	2019	1675.88	XIPKRO-56IP06A2-09V19	Xiphopenaeus kroyeri	Xipkro	48	11	F	0.61
IP	Externa	6	2	5	01.05.2019	2019	1675.88	XIPKRO-57IP06A2-09V19	Xiphopenaeus kroyeri	Xipkro	45	13	M	0.65
IP	Externa	6	2	5	01.05.2019	2019	1675.88	XIPKRO-58IP06A2-09V19	Xiphopenaeus kroyeri	Xipkro	52	15	F	1.15
IP	Externa	6	3	5	01.05.2019	2019	1178.75	XIPKRO-01IP06A3-09V19	Xiphopenaeus kroyeri	Xipkro	97	21	F	5.11
IP	Externa	6	3	5	01.05.2019	2019	1178.75	XIPKRO-02IP06A3-09V19	Xiphopenaeus kroyeri	Xipkro	96	26	F	8.47
IP	Externa	6	3	5	01.05.2019	2019	1178.75	XIPKRO-03IP06A3-09V19	Xiphopenaeus kroyeri	Xipkro	74	19	M	3.68
IP	Externa	6	3	5	01.05.2019	2019	1178.75	XIPKRO-04IP06A3-09V19	Xiphopenaeus kroyeri	Xipkro	76	20	F	2.92
IP	Externa	6	3	5	01.05.2019	2019	1178.75	XIPKRO-05IP06A3-09V19	Xiphopenaeus kroyeri	Xipkro	75	20	F	3.26
IP	Externa	6	3	5	01.05.2019	2019	1178.75	XIPKRO-06IP06A3-09V19	Xiphopenaeus kroyeri	Xipkro	90	21	F	5.35
IP	Externa	6	3	5	01.05.2019	2019	1178.75	XIPKRO-07IP06A3-09V19	Xiphopenaeus kroyeri	Xipkro	79	19	F	3.29
IP	Externa	6	3	5	01.05.2019	2019	1178.75	XIPKRO-08IP06A3-09V19	Xiphopenaeus kroyeri	Xipkro	65	16	F	2.07
IP	Externa	6	3	5	01.05.2019	2019	1178.75	XIPKRO-09IP06A3-09V19	Xiphopenaeus kroyeri	Xipkro	118	27	F	9.55
IP	Externa	6	3	5	01.05.2019	2019	1178.75	XIPKRO-10IP06A3-09V19	Xiphopenaeus kroyeri	Xipkro	99	22	F	7.23
IP	Externa	6	3	5	01.05.2019	2019	1178.75	XIPKRO-11IP06A3-09V19	Xiphopenaeus kroyeri	Xipkro	45	11	F	0.98
IP	Externa	6	3	5	01.05.2019	2019	1178.75	XIPKRO-12IP06A3-09V19	Xiphopenaeus kroyeri	Xipkro	89	19	M	6.45
IP	Externa	6	3	5	01.05.2019	2019	1178.75	XIPKRO-13IP06A3-09V19	Xiphopenaeus kroyeri	Xipkro	83	25	F	4.78
IP	Externa	6	3	5	01.05.2019	2019	1178.75	XIPKRO-14IP06A3-09V19	Xiphopenaeus kroyeri	Xipkro	88	21	F	5.29
IP	Externa	6	3	5	01.05.2019	2019	1178.75	XIPKRO-15IP06A3-09V19	Xiphopenaeus kroyeri	Xipkro	86	18	M	3.75
IP	Externa	6	3	5	01.05.2019	2019	1178.75	XIPKRO-16IP06A3-09V19	Xiphopenaeus kroyeri	Xipkro	81	18	F	3.61
IP	Externa	6	3	5	01.05.2019	2019	1178.75	XIPKRO-17IP06A3-09V19	Xiphopenaeus kroyeri	Xipkro	80	18	F	3.29
IP	Externa	6	3	5	01.05.2019	2019	1178.75	XIPKRO-18IP06A3-09V19	Xiphopenaeus kroyeri	Xipkro	96	20	M	5.63
IP	Externa	6	3	5	01.05.2019	2019	1178.75	XIPKRO-19IP06A3-09V19	Xiphopenaeus kroyeri	Xipkro	108	23	F	6.9
IP	Externa	6	3	5	01.05.2019	2019	1178.75	XIPKRO-20IP06A3-09V19	Xiphopenaeus kroyeri	Xipkro	81	18	F	4.64
IP	Externa	6	3	5	01.05.2019	2019	1178.75	XIPKRO-21IP06A3-09V19	Xiphopenaeus kroyeri	Xipkro	75	20	M	2.64
IP	Externa	6	3	5	01.05.2019	2019	1178.75	XIPKRO-22IP06A3-09V19	Xiphopenaeus kroyeri	Xipkro	62	16	F	1.88
IP	Externa	6	3	5	01.05.2019	2019	1178.75	XIPKRO-23IP06A3-09V19	Xiphopenaeus kroyeri	Xipkro	78	15	F	2.53
IP	Externa	6	3	5	01.05.2019	2019	1178.75	XIPKRO-24IP06A3-09V19	Xiphopenaeus kroyeri	Xipkro	96	19	F	7
IP	Externa	6	3	5	01.05.2019	2019	1178.75	XIPKRO-25IP06A3-09V19	Xiphopenaeus kroyeri	Xipkro	98	19	F	6.01
IP	Externa	6	3	5	01.05.2019	2019	1178.75	XIPKRO-26IP06A3-09V19	Xiphopenaeus kroyeri	Xipkro	101	27	F	8.24
IP	Externa	6	3	5	01.05.2019	2019	1178.75	XIPKRO-27IP06A3-09V19	Xiphopenaeus kroyeri	Xipkro	80	18	F	4.37
IP	Externa	6	3	5	01.05.2019	2019	1178.75	XIPKRO-28IP06A3-09V19	Xiphopenaeus kroyeri	Xipkro	102	21	F	7.15
IP	Externa	6	3	5	01.05.2019	2019	1178.75	XIPKRO-29IP06A3-09V19	Xiphopenaeus kroyeri	Xipkro	59	15	M	1.73
IP	Externa	6	3	5	01.05.2019	2019	1178.75	XIPKRO-30IP06A3-09V19	Xiphopenaeus kroyeri	Xipkro	105	22	F	7.74
IP	Externa	6	3	5	01.05.2019	2019	1178.75		Xiphopenaeus kroyeri	Xipkro				188.35
RD	Externa	3	2	5	01.05.2019	2019	1107	XIPKRO-01RD03A2-12V19	Xiphopenaeus kroyeri	Xipkro	82	20	F	3.5
RD	Externa	3	2	5	01.05.2019	2019	1107	XIPKRO-02RD03A2-12V19	Xiphopenaeus kroyeri	Xipkro	89	24	F	4.17
RD	Externa	3	2	5	01.05.2019	2019	1107	XIPKRO-03RD03A2-12V19	Xiphopenaeus kroyeri	Xipkro	97	24	F	6.32
RD	Externa	3	2	5	01.05.2019	2019	1107	XIPKRO-04RD03A2-12V19	Xiphopenaeus kroyeri	Xipkro	87	19	F	4.51
RD	Externa	3	2	5	01.05.2019	2019	1107	XIPKRO-05RD03A2-12V19	Xiphopenaeus kroyeri	Xipkro	81	23	F	4.17
RD	Externa	3	2	5	01.05.2019	2019	1107	XIPKRO-06RD03A2-12V19	Xiphopenaeus kroyeri	Xipkro	77	16	M	2.58
RD	Externa	3	2	5	01.05.2019	2019	1107	XIPKRO-07RD03A2-12V19	Xiphopenaeus kroyeri	Xipkro	77	21	M	3.42
RD	Externa	3	2	5	01.05.2019	2019	1107	XIPKRO-08RD03A2-12V19	Xiphopenaeus kroyeri	Xipkro	81	21	M	4
RD	Externa	3	2	5	01.05.2019	2019	1107	XIPKRO-09RD03A2-12V19	Xiphopenaeus kroyeri	Xipkro	75	16	F	2.93
RD	Externa	3	2	5	01.05.2019	2019	1107	XIPKRO-10RD03A2-12V19	Xiphopenaeus kroyeri	Xipkro	71	17	F	2.18
RD	Externa	3	2	5	01.05.2019	2019	1107	XIPKRO-11RD03A2-12V19	Xiphopenaeus kroyeri	Xipkro	77	19	M	2.24
RD	Externa	3	2	5	01.05.2019	2019	1107	XIPKRO-12RD03A2-12V19	Xiphopenaeus kroyeri	Xipkro	81	17	F	3.82
RD	Externa	3	2	5	01.05.2019	2019	1107	XIPKRO-13RD03A2-12V19	Xiphopenaeus kroyeri	Xipkro	81	21	M	3.81
RD	Externa	3	2	5	01.05.2019	2019	1107	XIPKRO-14RD03A2-12V19	Xiphopenaeus kroyeri	Xipkro	96	21	F	4.9
RD	Externa	3	2	5	01.05.2019	2019	1107	XIPKRO-15RD03A2-12V19	Xiphopenaeus kroyeri	Xipkro	60	12	M	1.41
RD	Externa	3	2	5	01.05.2019	2019	1107	XIPKRO-16RD03A2-12V19	Xiphopenaeus kroyeri	Xipkro	90	22	F	5.25
RD	Externa	3	2	5	01.05.2019	2019	1107	XIPKRO-17RD03A2-12V19	Xiphopenaeus kroyeri	Xipkro	90	21	F	5.14
RD	Externa	3	2	5	01.05.2019	2019	1107	XIPKRO-18RD03A2-12V19	Xiphopenaeus kroyeri	Xipkro	93	25	F	5.51
RD	Externa	3	2	5	01.05.2019	2019	1107	XIPKRO-19RD03A2-12V19	Xiphopenaeus kroyeri	Xipkro	89	20	M	3.96
RD	Externa	3	2	5	01.05.2019	2019	1107	XIPKRO-20RD03A2-12V19	Xiphopenaeus kroyeri	Xipkro	88	20	M	3.84
RD	Externa	3	2	5	01.05.2019	2019	1107	XIPKRO-21RD03A2-12V19	Xiphopenaeus kroyeri	Xipkro	92	24	F	6
RD	Externa	3	2	5	01.05.2019	2019	1107	XIPKRO-22RD03A2-12V19	Xiphopenaeus kroyeri	Xipkro	53	17	F	1.98
RD	Externa	3	2	5	01.05.2019	2019	1107	XIPKRO-23RD03A2-12V19	Xiphopenaeus kroyeri	Xipkro	82	20	F	3.63
RD	Externa	3	2	5	01.05.2019	2019	1107	XIPKRO-24RD03A2-12V19	Xiphopenaeus kroyeri	Xipkro	85	20	M	3.44
RD	Externa	3	2	5	01.05.2019	2019	1107	XIPKRO-25RD03A2-12V19	Xiphopenaeus kroyeri	Xipkro	68	18	F	1.93
RD	Externa	3	2	5	01.05.2019	2019	1107	XIPKRO-26RD03A2-12V19	Xiphopenaeus kroyeri	Xipkro	75	23	F	4.53
RD	Externa	3	2	5	01.05.2019	2019	1107	XIPKRO-27RD03A2-12V19	Xiphopenaeus kroyeri	Xipkro	82	24	F	5.46
RD	Externa	3	2	5	01.05.2019	2019	1107	XIPKRO-28RD03A2-12V19	Xiphopenaeus kroyeri	Xipkro	81	22	F	4
RD	Externa	3	2	5	01.05.2019	2019	1107	XIPKRO-29RD03A2-12V19	Xiphopenaeus kroyeri	Xipkro	66	19	F	2.49
RD	Externa	3	2	5	01.05.2019	2019	1107	XIPKRO-30RD03A2-12V19	Xiphopenaeus kroyeri	Xipkro	75	23	M	2.92
RD	Externa	3	2	5	01.05.2019	2019	1107		Xiphopenaeus kroyeri	Xipkro				102.19
RD	Externa	3	3	5	01.05.2019	2019	2403.62	XIPKRO-01RD03A3-12V19	Xiphopenaeus kroyeri	Xipkro	98	21	M	3.12
RD	Externa	3	3	5	01.05.2019	2019	2403.62	XIPKRO-02RD03A3-12V19	Xiphopenaeus kroyeri	Xipkro	95	20	M	5.32
RD	Externa	3	3	5	01.05.2019	2019	2403.62	XIPKRO-03RD03A3-12V19	Xiphopenaeus kroyeri	Xipkro	100	23	F	6.5
RD	Externa	3	3	5	01.05.2019	2019	2403.62	XIPKRO-04RD03A3-12V19	Xiphopenaeus kroyeri	Xipkro	95	21	F	6.47
RD	Externa	3	3	5	01.05.2019	2019	2403.62	XIPKRO-05RD03A3-12V19	Xiphopenaeus kroyeri	Xipkro	90	20	F	3.13
RD	Externa	3	3	5	01.05.2019	2019	2403.62	XIPKRO-06RD03A3-12V19	Xiphopenaeus kroyeri	Xipkro	90	18	M	4.71
RD	Externa	3	3	5	01.05.2019	2019	2403.62	XIPKRO-07RD03A3-12V19	Xiphopenaeus kroyeri	Xipkro	74	18	M	3.61
RD	Externa	3	3	5	01.05.2019	2019	2403.62	XIPKRO-08RD03A3-12V19	Xiphopenaeus kroyeri	Xipkro	92	18	M	4.26
RD	Externa	3	3	5	01.05.2019	2019	2403.62	XIPKRO-09RD03A3-12V19	Xiphopenaeus kroyeri	Xipkro	74	15	M	2.69
RD	Externa	3	3	5	01.05.2019	2019	2403.62	XIPKRO-10RD03A3-12V19	Xiphopenaeus kroyeri	Xipkro	76	18	F	3.63
RD	Externa	3	3	5	01.05.2019	2019	2403.62	XIPKRO-11RD03A3-12V19	Xiphopenaeus kroyeri	Xipkro	78	19	M	4.05
RD	Externa	3	3	5	01.05.2019	2019	2403.62	XIPKRO-12RD03A3-12V19	Xiphopenaeus kroyeri	Xipkro	93	20	M	6.13
RD	Externa	3	3	5	01.05.2019	2019	2403.62	XIPKRO-13RD03A3-12V19	Xiphopenaeus kroyeri	Xipkro	90	18	M	4.21
RD	Externa	3	3	5	01.05.2019	2019	2403.62	XIPKRO-14RD03A3-12V19	Xiphopenaeus kroyeri	Xipkro	70	18	M	2.16
RD	Externa	3	3	5	01.05.2019	2019	2403.62	XIPKRO-15RD03A3-12V19	Xiphopenaeus kroyeri	Xipkro	47	18	M	2.71
RD	Externa	3	3	5	01.05.2019	2019	2403.62	XIPKRO-16RD03A3-12V19	Xiphopenaeus kroyeri	Xipkro	103	24	F	6.12
RD	Externa	3	3	5	01.05.2019	2019	2403.62	XIPKRO-17RD03A3-12V19	Xiphopenaeus kroyeri	Xipkro	95	24	F	4.97
RD	Externa	3	3	5	01.05.2019	2019	2403.62	XIPKRO-18RD03A3-12V19	Xiphopenaeus kroyeri	Xipkro	90	20	M	4.33
RD	Externa	3	3	5	01.05.2019	2019	2403.62	XIPKRO-19RD03A3-12V19	Xiphopenaeus kroyeri	Xipkro	54	12	F	1.19
RD	Externa	3	3	5	01.05.2019	2019	2403.62	XIPKRO-20RD03A3-12V19	Xiphopenaeus kroyeri	Xipkro	60	15	F	1.4
RD	Externa	3	3	5	01.05.2019	2019	2403.62	XIPKRO-21RD03A3-12V19	Xiphopenaeus kroyeri	Xipkro	85	20	M	4.02
RD	Externa	3	3	5	01.05.2019	2019	2403.62	XIPKRO-22RD03A3-12V19	Xiphopenaeus kroyeri	Xipkro	72	15	M	2.22
RD	Externa	3	3	5	01.05.2019	2019	2403.62	XIPKRO-23RD03A3-12V19	Xiphopenaeus kroyeri	Xipkro	94	21	M	6.04
RD	Externa	3	3	5	01.05.2019	2019	2403.62	XIPKRO-24RD03A3-12V19	Xiphopenaeus kroyeri	Xipkro	72	17	M	2.34
RD	Externa	3	3	5	01.05.2019	2019	2403.62	XIPKRO-25RD03A3-12V19	Xiphopenaeus kroyeri	Xipkro	82	20	M	3.18
RD	Externa	3	3	5	01.05.2019	2019	2403.62	XIPKRO-26RD03A3-12V19	Xiphopenaeus kroyeri	Xipkro	90	20	M	4.67
RD	Externa	3	3	5	01.05.2019	2019	2403.62	XIPKRO-27RD03A3-12V19	Xiphopenaeus kroyeri	Xipkro	88	20	F	3.82
RD	Externa	3	3	5	01.05.2019	2019	2403.62	XIPKRO-28RD03A3-12V19	Xiphopenaeus kroyeri	Xipkro	87	20	M	3.91
RD	Externa	3	3	5	01.05.2019	2019	2403.62	XIPKRO-29RD03A3-12V19	Xiphopenaeus kroyeri	Xipkro	85	18	F	4.06
RD	Externa	3	3	5	01.05.2019	2019	2403.62	XIPKRO-30RD03A3-12V19	Xiphopenaeus kroyeri	Xipkro	74	16	M	2.18
RD	Externa	3	3	5	01.05.2019	2019	2403.62		Xiphopenaeus kroyeri	Xipkro				686.29
RD	Externa	8	2	5	01.05.2019	2019	1306.88	XIPKRO-01RD08A2-12V19	Xiphopenaeus kroyeri	Xipkro	94	22	F	5.19
RD	Externa	8	2	5	01.05.2019	2019	1306.88	XIPKRO-02RD08A2-12V19	Xiphopenaeus kroyeri	Xipkro	100	22	F	5.83
RD	Externa	8	2	5	01.05.2019	2019	1306.88	XIPKRO-03RD08A2-12V19	Xiphopenaeus kroyeri	Xipkro	80	16	F	2.56
RD	Externa	8	2	5	01.05.2019	2019	1306.88	XIPKRO-04RD08A2-12V19	Xiphopenaeus kroyeri	Xipkro	105	21	F	6.58
RD	Externa	8	2	5	01.05.2019	2019	1306.88	XIPKRO-05RD08A2-12V19	Xiphopenaeus kroyeri	Xipkro	107	22	F	6.37
RD	Externa	8	2	5	01.05.2019	2019	1306.88	XIPKRO-06RD08A2-12V19	Xiphopenaeus kroyeri	Xipkro	87	22	F	4.22
RD	Externa	8	2	5	01.05.2019	2019	1306.88	XIPKRO-07RD08A2-12V19	Xiphopenaeus kroyeri	Xipkro	81	17	M	3.32
RD	Externa	8	2	5	01.05.2019	2019	1306.88	XIPKRO-08RD08A2-12V19	Xiphopenaeus kroyeri	Xipkro	90	18	F	4.4
RD	Externa	8	2	5	01.05.2019	2019	1306.88	XIPKRO-09RD08A2-12V19	Xiphopenaeus kroyeri	Xipkro	91	16	M	3.16
RD	Externa	8	2	5	01.05.2019	2019	1306.88	XIPKRO-10RD08A2-12V19	Xiphopenaeus kroyeri	Xipkro	103	16	F	6.82
RD	Externa	8	2	5	01.05.2019	2019	1306.88	XIPKRO-11RD08A2-12V19	Xiphopenaeus kroyeri	Xipkro	69	16	M	2.67
RD	Externa	8	2	5	01.05.2019	2019	1306.88	XIPKRO-12RD08A2-12V19	Xiphopenaeus kroyeri	Xipkro	76	14	F	2.36
RD	Externa	8	2	5	01.05.2019	2019	1306.88	XIPKRO-13RD08A2-12V19	Xiphopenaeus kroyeri	Xipkro	81	14	F	3.36
RD	Externa	8	2	5	01.05.2019	2019	1306.88	XIPKRO-14RD08A2-12V19	Xiphopenaeus kroyeri	Xipkro	71	17	F	2
RD	Externa	8	2	5	01.05.2019	2019	1306.88	XIPKRO-15RD08A2-12V19	Xiphopenaeus kroyeri	Xipkro	79	19	F	2.88
RD	Externa	8	2	5	01.05.2019	2019	1306.88	XIPKRO-16RD08A2-12V19	Xiphopenaeus kroyeri	Xipkro	79	19	F	4.24
RD	Externa	8	2	5	01.05.2019	2019	1306.88	XIPKRO-17RD08A2-12V19	Xiphopenaeus kroyeri	Xipkro	60	11	F	2.11
RD	Externa	8	2	5	01.05.2019	2019	1306.88	XIPKRO-18RD08A2-12V19	Xiphopenaeus kroyeri	Xipkro	69	13	M	1.72
RD	Externa	8	2	5	01.05.2019	2019	1306.88	XIPKRO-19RD08A2-12V19	Xiphopenaeus kroyeri	Xipkro	67	12	M	2.72
RD	Externa	8	2	5	01.05.2019	2019	1306.88	XIPKRO-20RD08A2-12V19	Xiphopenaeus kroyeri	Xipkro	72	13	M	2.32
RD	Externa	8	2	5	01.05.2019	2019	1306.88	XIPKRO-21RD08A2-12V19	Xiphopenaeus kroyeri	Xipkro	76	15	M	1.6
RD	Externa	8	2	5	01.05.2019	2019	1306.88	XIPKRO-22RD08A2-12V19	Xiphopenaeus kroyeri	Xipkro	66	11	M	1.73
RD	Externa	8	2	5	01.05.2019	2019	1306.88	XIPKRO-23RD08A2-12V19	Xiphopenaeus kroyeri	Xipkro	44	13	F	0.82
RD	Externa	8	2	5	01.05.2019	2019	1306.88	XIPKRO-24RD08A2-12V19	Xiphopenaeus kroyeri	Xipkro	71	17	F	3.18
RD	Externa	8	2	5	01.05.2019	2019	1306.88	XIPKRO-25RD08A2-12V19	Xiphopenaeus kroyeri	Xipkro	61	12	M	2.28
RD	Externa	8	2	5	01.05.2019	2019	1306.88	XIPKRO-26RD08A2-12V19	Xiphopenaeus kroyeri	Xipkro	89	19	M	4.25
RD	Externa	8	2	5	01.05.2019	2019	1306.88	XIPKRO-27RD08A2-12V19	Xiphopenaeus kroyeri	Xipkro	89	18	M	4.12
RD	Externa	8	2	5	01.05.2019	2019	1306.88	XIPKRO-28RD08A2-12V19	Xiphopenaeus kroyeri	Xipkro	84	16	M	3.3
RD	Externa	8	2	5	01.05.2019	2019	1306.88	XIPKRO-29RD08A2-12V19	Xiphopenaeus kroyeri	Xipkro	79	17	M	2.87
RD	Externa	8	2	5	01.05.2019	2019	1306.88	XIPKRO-30RD08A2-12V19	Xiphopenaeus kroyeri	Xipkro	70	13	F	1.6
RD	Externa	8	2	5	01.05.2019	2019	1306.88	XIPKRO-31RD08A2-12V19	Xiphopenaeus kroyeri	Xipkro	70	15	F	1.78
RD	Externa	8	2	5	01.05.2019	2019	1306.88		Xiphopenaeus kroyeri	Xipkro				181.55
RD	Externa	8	3	5	01.05.2019	2019	1573.38	XIPKRO-01RD08A3-12V19	Xiphopenaeus kroyeri	Xipkro	120	29	F	11.39
RD	Externa	8	3	5	01.05.2019	2019	1573.38	XIPKRO-02RD08A3-12V19	Xiphopenaeus kroyeri	Xipkro	118	25	F	7.09
RD	Externa	8	3	5	01.05.2019	2019	1573.38	XIPKRO-03RD08A3-12V19	Xiphopenaeus kroyeri	Xipkro	93	21	F	6.16
RD	Externa	8	3	5	01.05.2019	2019	1573.38	XIPKRO-04RD08A3-12V19	Xiphopenaeus kroyeri	Xipkro	93	21	F	5.26
RD	Externa	8	3	5	01.05.2019	2019	1573.38	XIPKRO-05RD08A3-12V19	Xiphopenaeus kroyeri	Xipkro	78	17	M	3.17
RD	Externa	8	3	5	01.05.2019	2019	1573.38	XIPKRO-06RD08A3-12V19	Xiphopenaeus kroyeri	Xipkro	71	14	F	2.2
RD	Externa	8	3	5	01.05.2019	2019	1573.38	XIPKRO-07RD08A3-12V19	Xiphopenaeus kroyeri	Xipkro	80	18	F	3.13
RD	Externa	8	3	5	01.05.2019	2019	1573.38	XIPKRO-08RD08A3-12V19	Xiphopenaeus kroyeri	Xipkro	83	20	F	4.22
RD	Externa	8	3	5	01.05.2019	2019	1573.38	XIPKRO-09RD08A3-12V19	Xiphopenaeus kroyeri	Xipkro	73	16	M	2.53
RD	Externa	8	3	5	01.05.2019	2019	1573.38	XIPKRO-10RD08A3-12V19	Xiphopenaeus kroyeri	Xipkro	76	17	M	2.71
RD	Externa	8	3	5	01.05.2019	2019	1573.38	XIPKRO-11RD08A3-12V19	Xiphopenaeus kroyeri	Xipkro	86	19	M	3.63
RD	Externa	8	3	5	01.05.2019	2019	1573.38	XIPKRO-12RD08A3-12V19	Xiphopenaeus kroyeri	Xipkro	97	22	F	5.34
RD	Externa	8	3	5	01.05.2019	2019	1573.38	XIPKRO-13RD08A3-12V19	Xiphopenaeus kroyeri	Xipkro	82	19	F	3.73
RD	Externa	8	3	5	01.05.2019	2019	1573.38	XIPKRO-14RD08A3-12V19	Xiphopenaeus kroyeri	Xipkro	81	8	M	3.25
RD	Externa	8	3	5	01.05.2019	2019	1573.38	XIPKRO-15RD08A3-12V19	Xiphopenaeus kroyeri	Xipkro	87	19	M	4.26
RD	Externa	8	3	5	01.05.2019	2019	1573.38	XIPKRO-16RD08A3-12V19	Xiphopenaeus kroyeri	Xipkro	92	22	F	4.96
RD	Externa	8	3	5	01.05.2019	2019	1573.38	XIPKRO-17RD08A3-12V19	Xiphopenaeus kroyeri	Xipkro	88	2	F	4.3
RD	Externa	8	3	5	01.05.2019	2019	1573.38	XIPKRO-18RD08A3-12V19	Xiphopenaeus kroyeri	Xipkro	70	16	F	2.38
RD	Externa	8	3	5	01.05.2019	2019	1573.38	XIPKRO-19RD08A3-12V19	Xiphopenaeus kroyeri	Xipkro	77	18	F	3.49
RD	Externa	8	3	5	01.05.2019	2019	1573.38	XIPKRO-20RD08A3-12V19	Xiphopenaeus kroyeri	Xipkro	72	16	F	2.61
RD	Externa	8	3	5	01.05.2019	2019	1573.38	XIPKRO-21RD08A3-12V19	Xiphopenaeus kroyeri	Xipkro	74	16	M	2.49
RD	Externa	8	3	5	01.05.2019	2019	1573.38	XIPKRO-22RD08A3-12V19	Xiphopenaeus kroyeri	Xipkro	72	15	M	2.13
RD	Externa	8	3	5	01.05.2019	2019	1573.38	XIPKRO-23RD08A3-12V19	Xiphopenaeus kroyeri	Xipkro	67	14	F	1.91
RD	Externa	8	3	5	01.05.2019	2019	1573.38	XIPKRO-24RD08A3-12V19	Xiphopenaeus kroyeri	Xipkro	83	20	M	4.01
RD	Externa	8	3	5	01.05.2019	2019	1573.38	XIPKRO-25RD08A3-12V19	Xiphopenaeus kroyeri	Xipkro	68	15	M	2.02
RD	Externa	8	3	5	01.05.2019	2019	1573.38	XIPKRO-26RD08A3-12V19	Xiphopenaeus kroyeri	Xipkro	72	16	F	2.55
RD	Externa	8	3	5	01.05.2019	2019	1573.38	XIPKRO-27RD08A3-12V19	Xiphopenaeus kroyeri	Xipkro	78	17	F	3.05
RD	Externa	8	3	5	01.05.2019	2019	1573.38	XIPKRO-28RD08A3-12V19	Xiphopenaeus kroyeri	Xipkro	71	19	M	3.47
RD	Externa	8	3	5	01.05.2019	2019	1573.38	XIPKRO-29RD08A3-12V19	Xiphopenaeus kroyeri	Xipkro	68	16	M	2.15
RD	Externa	8	3	5	01.05.2019	2019	1573.38	XIPKRO-30RD08A3-12V19	Xiphopenaeus kroyeri	Xipkro	68	16	M	2.12
RD	Externa	8	3	5	01.05.2019	2019	1573.38		Xiphopenaeus kroyeri	Xipkro				516.35
SM	Externa	3	1	5	01.05.2019	2019	789.25	XIPKRO-01SM03A1-12V19	Xiphopenaeus kroyeri	Xipkro	57	20	F	1.76
SM	Externa	4	2	5	01.05.2019	2019	1327.38	XIPKRO-01SM04A2-12V19	Xiphopenaeus kroyeri	Xipkro	105	26	F	7.65
SM	Externa	4	2	5	01.05.2019	2019	1327.38	XIPKRO-02SM04A2-12V19	Xiphopenaeus kroyeri	Xipkro	75	17	F	2.56
SM	Externa	4	2	5	01.05.2019	2019	1327.38	XIPKRO-03SM04A2-12V19	Xiphopenaeus kroyeri	Xipkro	77	17	F	2.46
SM	Externa	4	2	5	01.05.2019	2019	1327.38	XIPKRO-04SM04A2-12V19	Xiphopenaeus kroyeri	Xipkro	83	20	F	4.05
SM	Externa	4	2	5	01.05.2019	2019	1327.38	XIPKRO-05SM04A2-12V19	Xiphopenaeus kroyeri	Xipkro	59	13	M	1.26
SM	Externa	4	2	5	01.05.2019	2019	1327.38	XIPKRO-06SM04A2-12V19	Xiphopenaeus kroyeri	Xipkro	92	24	F	5.84
SM	Externa	4	2	5	01.05.2019	2019	1327.38	XIPKRO-07SM04A2-12V19	Xiphopenaeus kroyeri	Xipkro	83	21	F	4.47
SM	Externa	4	2	5	01.05.2019	2019	1327.38	XIPKRO-08SM04A2-12V19	Xiphopenaeus kroyeri	Xipkro	74	17	F	2.38
SM	Externa	4	2	5	01.05.2019	2019	1327.38	XIPKRO-09SM04A2-12V19	Xiphopenaeus kroyeri	Xipkro	94	24	F	6.26
SM	Externa	4	2	5	01.05.2019	2019	1327.38	XIPKRO-10SM04A2-12V19	Xiphopenaeus kroyeri	Xipkro	73	20	F	3.73
SM	Externa	4	2	5	01.05.2019	2019	1327.38	XIPKRO-11SM04A2-12V19	Xiphopenaeus kroyeri	Xipkro	62	16	F	1.88
SM	Externa	4	2	5	01.05.2019	2019	1327.38	XIPKRO-12SM04A2-12V19	Xiphopenaeus kroyeri	Xipkro	72	17	F	2.49
SM	Externa	4	2	5	01.05.2019	2019	1327.38	XIPKRO-13SM04A2-12V19	Xiphopenaeus kroyeri	Xipkro	73	18	F	2.89
SM	Externa	4	2	5	01.05.2019	2019	1327.38	XIPKRO-14SM04A2-12V19	Xiphopenaeus kroyeri	Xipkro	70	16	F	2.47
SM	Externa	4	2	5	01.05.2019	2019	1327.38	XIPKRO-15SM04A2-12V19	Xiphopenaeus kroyeri	Xipkro	93	23	F	5.78
SM	Externa	4	2	5	01.05.2019	2019	1327.38	XIPKRO-16SM04A2-12V19	Xiphopenaeus kroyeri	Xipkro	90	22	F	5.5
SM	Externa	4	2	5	01.05.2019	2019	1327.38	XIPKRO-17SM04A2-12V19	Xiphopenaeus kroyeri	Xipkro	77	18	M	3.08
SM	Externa	4	2	5	01.05.2019	2019	1327.38	XIPKRO-18SM04A2-12V19	Xiphopenaeus kroyeri	Xipkro	81	20	F	3.51
SM	Externa	4	2	5	01.05.2019	2019	1327.38	XIPKRO-19SM04A2-12V19	Xiphopenaeus kroyeri	Xipkro	82	22	F	4
SM	Externa	4	2	5	01.05.2019	2019	1327.38	XIPKRO-20SM04A2-12V19	Xiphopenaeus kroyeri	Xipkro	82	21	F	4.23
SM	Externa	4	2	5	01.05.2019	2019	1327.38	XIPKRO-21SM04A2-12V19	Xiphopenaeus kroyeri	Xipkro	83	20	F	3.61
SM	Externa	4	2	5	01.05.2019	2019	1327.38	XIPKRO-22SM04A2-12V19	Xiphopenaeus kroyeri	Xipkro	80	20	M	3.65
SM	Externa	4	2	5	01.05.2019	2019	1327.38	XIPKRO-23SM04A2-12V19	Xiphopenaeus kroyeri	Xipkro	79	18	F	2.95
SM	Externa	4	2	5	01.05.2019	2019	1327.38	XIPKRO-24SM04A2-12V19	Xiphopenaeus kroyeri	Xipkro	67	17	M	2.29
SM	Externa	4	2	5	01.05.2019	2019	1327.38	XIPKRO-25SM04A2-12V19	Xiphopenaeus kroyeri	Xipkro	55	15	F	1.32
SM	Externa	4	2	5	01.05.2019	2019	1327.38	XIPKRO-26SM04A2-12V19	Xiphopenaeus kroyeri	Xipkro	90	22	M	5.3
SM	Externa	4	2	5	01.05.2019	2019	1327.38	XIPKRO-27SM04A2-12V19	Xiphopenaeus kroyeri	Xipkro	85	20	F	4.14
SM	Externa	4	2	5	01.05.2019	2019	1327.38	XIPKRO-28SM04A2-12V19	Xiphopenaeus kroyeri	Xipkro	70	18	M	2.48
SM	Externa	4	2	5	01.05.2019	2019	1327.38	XIPKRO-29SM04A2-12V19	Xiphopenaeus kroyeri	Xipkro	72	17	F	2.31
SM	Externa	4	2	5	01.05.2019	2019	1327.38	XIPKRO-30SM04A2-12V19	Xiphopenaeus kroyeri	Xipkro	65	14	F	1.54
SM	Externa	4	2	5	01.05.2019	2019	1327.38		Xiphopenaeus kroyeri	Xipkro				40.33
SM	Externa	5	1	5	01.05.2019	2019	1214.62	XIPKRO-01SM05A1-12V19	Xiphopenaeus kroyeri	Xipkro	103	26	F	7.09
SM	Externa	5	2	5	01.05.2019	2019	1250.5	XIPKRO-01SM05A2-12V19	Xiphopenaeus kroyeri	Xipkro	63	12	M	1.34
SM	Externa	5	2	5	01.05.2019	2019	1250.5	XIPKRO-02SM05A2-12V19	Xiphopenaeus kroyeri	Xipkro	50	11	F	0.75
SM	Externa	5	2	5	01.05.2019	2019	1250.5	XIPKRO-03SM05A2-12V19	Xiphopenaeus kroyeri	Xipkro	57	13	F	1.05
SM	Externa	5	2	5	01.05.2019	2019	1250.5	XIPKRO-04SM05A2-12V19	Xiphopenaeus kroyeri	Xipkro	40	7	F	0.38
SM	Externa	5	2	5	01.05.2019	2019	1250.5	XIPKRO-05SM05A2-12V19	Xiphopenaeus kroyeri	Xipkro	81	33	F	2.83
SM	Externa	5	2	5	01.05.2019	2019	1250.5	XIPKRO-06SM05A2-12V19	Xiphopenaeus kroyeri	Xipkro	70	16	F	7.4
SM	Externa	5	2	5	01.05.2019	2019	1250.5	XIPKRO-07SM05A2-12V19	Xiphopenaeus kroyeri	Xipkro	81	18	F	3.24
SM	Externa	5	2	5	01.05.2019	2019	1250.5	XIPKRO-08SM05A2-12V19	Xiphopenaeus kroyeri	Xipkro	70	15	F	1.87
SM	Externa	5	2	5	01.05.2019	2019	1250.5	XIPKRO-09SM05A2-12V19	Xiphopenaeus kroyeri	Xipkro	65	14	F	1.48
SM	Externa	5	2	5	01.05.2019	2019	1250.5	XIPKRO-10SM05A2-12V19	Xiphopenaeus kroyeri	Xipkro	75	16	F	2.65
SM	Externa	5	2	5	01.05.2019	2019	1250.5	XIPKRO-11SM05A2-12V19	Xiphopenaeus kroyeri	Xipkro	75	18	F	2.49
SM	Externa	5	2	5	01.05.2019	2019	1250.5	XIPKRO-12SM05A2-12V19	Xiphopenaeus kroyeri	Xipkro	70	13	F	2.05
SM	Externa	5	2	5	01.05.2019	2019	1250.5	XIPKRO-13SM05A2-12V19	Xiphopenaeus kroyeri	Xipkro	70	15	F	2.15
SM	Externa	5	2	5	01.05.2019	2019	1250.5	XIPKRO-14SM05A2-12V19	Xiphopenaeus kroyeri	Xipkro	71	15	F	1.96
SM	Externa	5	2	5	01.05.2019	2019	1250.5	XIPKRO-15SM05A2-12V19	Xiphopenaeus kroyeri	Xipkro	70	14	F	2.12
SM	Externa	5	2	5	01.05.2019	2019	1250.5	XIPKRO-16SM05A2-12V19	Xiphopenaeus kroyeri	Xipkro	84	18	F	3.2
SM	Externa	5	2	5	01.05.2019	2019	1250.5	XIPKRO-17SM05A2-12V19	Xiphopenaeus kroyeri	Xipkro	70	17	F	2.98
SM	Externa	5	2	5	01.05.2019	2019	1250.5	XIPKRO-18SM05A2-12V19	Xiphopenaeus kroyeri	Xipkro	83	19	F	3.24
SM	Externa	5	2	5	01.05.2019	2019	1250.5	XIPKRO-19SM05A2-12V19	Xiphopenaeus kroyeri	Xipkro	89	19	M	4.16
SM	Externa	5	2	5	01.05.2019	2019	1250.5	XIPKRO-20SM05A2-12V19	Xiphopenaeus kroyeri	Xipkro	79	18	F	2.92
SM	Externa	5	2	5	01.05.2019	2019	1250.5	XIPKRO-21SM05A2-12V19	Xiphopenaeus kroyeri	Xipkro	83	18	F	3.5
SM	Externa	5	2	5	01.05.2019	2019	1250.5	XIPKRO-22SM05A2-12V19	Xiphopenaeus kroyeri	Xipkro	103	23	F	6.2
SM	Externa	5	2	5	01.05.2019	2019	1250.5	XIPKRO-23SM05A2-12V19	Xiphopenaeus kroyeri	Xipkro	92	21	F	4.67
SM	Externa	5	2	5	01.05.2019	2019	1250.5	XIPKRO-24SM05A2-12V19	Xiphopenaeus kroyeri	Xipkro	95	18	F	5.35
SM	Externa	5	2	5	01.05.2019	2019	1250.5	XIPKRO-25SM05A2-12V19	Xiphopenaeus kroyeri	Xipkro	93	21	F	5.15
SM	Externa	5	2	5	01.05.2019	2019	1250.5	XIPKRO-26SM05A2-12V19	Xiphopenaeus kroyeri	Xipkro	97	22	F	5.72
SM	Externa	5	2	5	01.05.2019	2019	1250.5	XIPKRO-27SM05A2-12V19	Xiphopenaeus kroyeri	Xipkro	99	21	F	5.25
SM	Externa	5	2	5	01.05.2019	2019	1250.5	XIPKRO-28SM05A2-12V19	Xiphopenaeus kroyeri	Xipkro	86	18	F	3.98
SM	Externa	5	2	5	01.05.2019	2019	1250.5	XIPKRO-29SM05A2-12V19	Xiphopenaeus kroyeri	Xipkro	93	20	M	4.99
SM	Externa	5	2	5	01.05.2019	2019	1250.5	XIPKRO-30SM05A2-12V19	Xiphopenaeus kroyeri	Xipkro	82	18	F	3.96
SM	Externa	5	2	5	01.05.2019	2019	1250.5	XIPKRO-31SM05A2-12V19	Xiphopenaeus kroyeri	Xipkro	82	19	F	3.41
SM	Externa	6	1	5	01.05.2019	2019	1204.38	XIPKRO-01SM06A1-12V19	Xiphopenaeus kroyeri	Xipkro	74	17	M	1.77
SM	Externa	6	1	5	01.05.2019	2019	1204.38	XIPKRO-02SM06A1-12V19	Xiphopenaeus kroyeri	Xipkro	73	18	M	2.16
SM	Externa	6	1	5	01.05.2019	2019	1204.38	XIPKRO-03SM06A1-12V19	Xiphopenaeus kroyeri	Xipkro	72	17	F	1.83
SM	Externa	6	1	5	01.05.2019	2019	1204.38	XIPKRO-04SM06A1-12V19	Xiphopenaeus kroyeri	Xipkro	80	17	F	2.62
SM	Externa	6	1	5	01.05.2019	2019	1204.38	XIPKRO-05SM06A1-12V19	Xiphopenaeus kroyeri	Xipkro	72	15	M	1.82
SM	Externa	6	1	5	01.05.2019	2019	1204.38	XIPKRO-06SM06A1-12V19	Xiphopenaeus kroyeri	Xipkro	70	16	M	1.91
SM	Externa	6	1	5	01.05.2019	2019	1204.38	XIPKRO-07SM06A1-12V19	Xiphopenaeus kroyeri	Xipkro	63	16	F	1.4
SM	Externa	6	1	5	01.05.2019	2019	1204.38	XIPKRO-08SM06A1-12V19	Xiphopenaeus kroyeri	Xipkro	57	12	M	0.97
SM	Externa	6	1	5	01.05.2019	2019	1204.38	XIPKRO-09SM06A1-12V19	Xiphopenaeus kroyeri	Xipkro	62	15	F	1.69
SM	Externa	6	2	5	01.05.2019	2019	1199.25	XIPKRO-01SM06A2-12V19	Xiphopenaeus kroyeri	Xipkro	62	19	M	2.35
SM	Externa	6	2	5	01.05.2019	2019	1199.25	XIPKRO-02SM06A2-12V19	Xiphopenaeus kroyeri	Xipkro	54	12	F	1.88
SM	Externa	6	2	5	01.05.2019	2019	1199.25	XIPKRO-03SM06A2-12V19	Xiphopenaeus kroyeri	Xipkro	40	10	M	1.49
SM	Externa	6	2	5	01.05.2019	2019	1199.25	XIPKRO-04SM06A2-12V19	Xiphopenaeus kroyeri	Xipkro	50	19	M	2.07
SM	Externa	6	2	5	01.05.2019	2019	1199.25	XIPKRO-05SM06A2-12V19	Xiphopenaeus kroyeri	Xipkro	50	18	M	1.49
SM	Externa	6	2	5	01.05.2019	2019	1199.25	XIPKRO-06SM06A2-12V19	Xiphopenaeus kroyeri	Xipkro	52	18	M	1.72
SM	Externa	6	2	5	01.05.2019	2019	1199.25	XIPKRO-07SM06A2-12V19	Xiphopenaeus kroyeri	Xipkro	58	20	M	2.3
SM	Externa	6	2	5	01.05.2019	2019	1199.25	XIPKRO-08SM06A2-12V19	Xiphopenaeus kroyeri	Xipkro	50	17	F	1.46
SM	Externa	6	2	5	01.05.2019	2019	1199.25	XIPKRO-09SM06A2-12V19	Xiphopenaeus kroyeri	Xipkro	59	21	F	2.48
SM	Externa	6	2	5	01.05.2019	2019	1199.25	XIPKRO-10SM06A2-12V19	Xiphopenaeus kroyeri	Xipkro	66	23	F	3.66
SM	Externa	6	2	5	01.05.2019	2019	1199.25	XIPKRO-11SM06A2-12V19	Xiphopenaeus kroyeri	Xipkro	56	19	M	2.09
SM	Externa	6	2	5	01.05.2019	2019	1199.25	XIPKRO-12SM06A2-12V19	Xiphopenaeus kroyeri	Xipkro	50	18	M	1.37
SM	Externa	6	2	5	01.05.2019	2019	1199.25	XIPKRO-13SM06A2-12V19	Xiphopenaeus kroyeri	Xipkro	68	22	M	4.38
SM	Externa	6	2	5	01.05.2019	2019	1199.25	XIPKRO-14SM06A2-12V19	Xiphopenaeus kroyeri	Xipkro	60	22	F	2.91
SM	Externa	6	2	5	01.05.2019	2019	1199.25	XIPKRO-15SM06A2-12V19	Xiphopenaeus kroyeri	Xipkro	54	19	M	1.72
SM	Externa	6	2	5	01.05.2019	2019	1199.25	XIPKRO-16SM06A2-12V19	Xiphopenaeus kroyeri	Xipkro	41	15	M	0.7
SM	Externa	6	2	5	01.05.2019	2019	1199.25	XIPKRO-17SM06A2-12V19	Xiphopenaeus kroyeri	Xipkro	40	13	F	0.7
SM	Externa	6	2	5	01.05.2019	2019	1199.25	XIPKRO-18SM06A2-12V19	Xiphopenaeus kroyeri	Xipkro	51	18	M	1.59
SM	Externa	6	2	5	01.05.2019	2019	1199.25	XIPKRO-19SM06A2-12V19	Xiphopenaeus kroyeri	Xipkro	56	19	M	2.21
SM	Externa	6	2	5	01.05.2019	2019	1199.25	XIPKRO-20SM06A2-12V19	Xiphopenaeus kroyeri	Xipkro	58	19	M	2.05
SM	Externa	6	2	5	01.05.2019	2019	1199.25	XIPKRO-21SM06A2-12V19	Xiphopenaeus kroyeri	Xipkro	39	14	F	0.69
SM	Externa	6	2	5	01.05.2019	2019	1199.25	XIPKRO-22SM06A2-12V19	Xiphopenaeus kroyeri	Xipkro	46	17	M	1.08
SM	Externa	6	2	5	01.05.2019	2019	1199.25	XIPKRO-23SM06A2-12V19	Xiphopenaeus kroyeri	Xipkro	35	11	F	0.41
SM	Externa	6	2	5	01.05.2019	2019	1199.25	XIPKRO-24SM06A2-12V19	Xiphopenaeus kroyeri	Xipkro	55	18	M	1.77
SM	Externa	6	2	5	01.05.2019	2019	1199.25	XIPKRO-25SM06A2-12V19	Xiphopenaeus kroyeri	Xipkro	60	23	F	2.77
SM	Externa	6	2	5	01.05.2019	2019	1199.25	XIPKRO-26SM06A2-12V19	Xiphopenaeus kroyeri	Xipkro	50	17	M	1.78
SM	Externa	6	2	5	01.05.2019	2019	1199.25	XIPKRO-27SM06A2-12V19	Xiphopenaeus kroyeri	Xipkro	59	23	F	3.05
SM	Externa	6	2	5	01.05.2019	2019	1199.25	XIPKRO-28SM06A2-12V19	Xiphopenaeus kroyeri	Xipkro	50	17	M	1.21
SM	Externa	6	2	5	01.05.2019	2019	1199.25	XIPKRO-29SM06A2-12V19	Xiphopenaeus kroyeri	Xipkro	42	13	F	0.67
SM	Externa	6	2	5	01.05.2019	2019	1199.25	XIPKRO-30SM06A2-12V19	Xiphopenaeus kroyeri	Xipkro	60	21	M	2.25
SM	Externa	6	2	5	01.05.2019	2019	1199.25		Xiphopenaeus kroyeri	Xipkro				94.64
SM	Externa	6	3	5	01.05.2019	2019	1107	XIPKRO-01SM06A3-12V19	Xiphopenaeus kroyeri	Xipkro	56	19	M	1.97
SM	Externa	6	3	5	01.05.2019	2019	1107	XIPKRO-02SM06A3-12V19	Xiphopenaeus kroyeri	Xipkro	57	21	F	2.35
SM	Externa	6	3	5	01.05.2019	2019	1107	XIPKRO-03SM06A3-12V19	Xiphopenaeus kroyeri	Xipkro	67	23	F	3.74
SM	Externa	6	3	5	01.05.2019	2019	1107	XIPKRO-04SM06A3-12V19	Xiphopenaeus kroyeri	Xipkro	52	16	M	1.54
SM	Externa	6	3	5	01.05.2019	2019	1107	XIPKRO-05SM06A3-12V19	Xiphopenaeus kroyeri	Xipkro	60	22	F	3.29
SM	Externa	6	3	5	01.05.2019	2019	1107	XIPKRO-06SM06A3-12V19	Xiphopenaeus kroyeri	Xipkro	56	21	F	2.27
SM	Externa	6	3	5	01.05.2019	2019	1107	XIPKRO-07SM06A3-12V19	Xiphopenaeus kroyeri	Xipkro	52	17	M	1.48
SM	Externa	6	3	5	01.05.2019	2019	1107	XIPKRO-08SM06A3-12V19	Xiphopenaeus kroyeri	Xipkro	55	20	F	2.02
SM	Externa	6	3	5	01.05.2019	2019	1107	XIPKRO-09SM06A3-12V19	Xiphopenaeus kroyeri	Xipkro	59	18	F	1.99
SM	Externa	6	3	5	01.05.2019	2019	1107	XIPKRO-10SM06A3-12V19	Xiphopenaeus kroyeri	Xipkro	50	16	F	1.51
SM	Externa	6	3	5	01.05.2019	2019	1107	XIPKRO-11SM06A3-12V19	Xiphopenaeus kroyeri	Xipkro	49	17	M	1.31
SM	Externa	6	3	5	01.05.2019	2019	1107	XIPKRO-12SM06A3-12V19	Xiphopenaeus kroyeri	Xipkro	58	20	F	2.22
SM	Externa	6	3	5	01.05.2019	2019	1107	XIPKRO-13SM06A3-12V19	Xiphopenaeus kroyeri	Xipkro	50	15	F	1.32
SM	Externa	6	3	5	01.05.2019	2019	1107	XIPKRO-14SM06A3-12V19	Xiphopenaeus kroyeri	Xipkro	64	22	F	3.65
SM	Externa	6	3	5	01.05.2019	2019	1107	XIPKRO-15SM06A3-12V19	Xiphopenaeus kroyeri	Xipkro	45	14	F	0.94
SM	Externa	6	3	5	01.05.2019	2019	1107	XIPKRO-16SM06A3-12V19	Xiphopenaeus kroyeri	Xipkro	60	18	M	2.06
SM	Externa	6	3	5	01.05.2019	2019	1107	XIPKRO-17SM06A3-12V19	Xiphopenaeus kroyeri	Xipkro	64	21	F	3.62
SM	Externa	6	3	5	01.05.2019	2019	1107	XIPKRO-18SM06A3-12V19	Xiphopenaeus kroyeri	Xipkro	56	18	F	1.88
SM	Externa	6	3	5	01.05.2019	2019	1107	XIPKRO-19SM06A3-12V19	Xiphopenaeus kroyeri	Xipkro	51	18	F	1.45
SM	Externa	6	3	5	01.05.2019	2019	1107	XIPKRO-20SM06A3-12V19	Xiphopenaeus kroyeri	Xipkro	55	18	M	1.99
SM	Externa	6	3	5	01.05.2019	2019	1107	XIPKRO-21SM06A3-12V19	Xiphopenaeus kroyeri	Xipkro	50	16	F	1.33
SM	Externa	6	3	5	01.05.2019	2019	1107	XIPKRO-22SM06A3-12V19	Xiphopenaeus kroyeri	Xipkro	42	19	F	1.75
SM	Externa	6	3	5	01.05.2019	2019	1107	XIPKRO-23SM06A3-12V19	Xiphopenaeus kroyeri	Xipkro	42	13	F	0.65
SM	Externa	6	3	5	01.05.2019	2019	1107	XIPKRO-24SM06A3-12V19	Xiphopenaeus kroyeri	Xipkro	51	28	F	1.6
SM	Externa	6	3	5	01.05.2019	2019	1107	XIPKRO-25SM06A3-12V19	Xiphopenaeus kroyeri	Xipkro	49	16	F	1.3
SM	Externa	6	3	5	01.05.2019	2019	1107	XIPKRO-26SM06A3-12V19	Xiphopenaeus kroyeri	Xipkro	68	23	F	3.88
SM	Externa	6	3	5	01.05.2019	2019	1107	XIPKRO-27SM06A3-12V19	Xiphopenaeus kroyeri	Xipkro	55	19	M	2.02
SM	Externa	6	3	5	01.05.2019	2019	1107	XIPKRO-28SM06A3-12V19	Xiphopenaeus kroyeri	Xipkro	63	23	F	3.7
SM	Externa	6	3	5	01.05.2019	2019	1107	XIPKRO-29SM06A3-12V19	Xiphopenaeus kroyeri	Xipkro	65	22	F	3.06
SM	Externa	6	3	5	01.05.2019	2019	1107		Xiphopenaeus kroyeri	Xipkro				182.46
CV	Externa	3	1	6	01.06.2019	2019	1455.5	XIPKRO-01CA03A1-11VI19	Xiphopenaeus kroyeri	Xipkro	92	23	F	4.95
CV	Externa	3	1	6	01.06.2019	2019	1455.5	XIPKRO-02CA03A1-11VI19	Xiphopenaeus kroyeri	Xipkro	67	16	F	2.25
CV	Externa	3	1	6	01.06.2019	2019	1455.5	XIPKRO-03CA03A1-11VI19	Xiphopenaeus kroyeri	Xipkro	80	19	F	3
CV	Externa	3	1	6	01.06.2019	2019	1455.5	XIPKRO-04CA03A1-11VI19	Xiphopenaeus kroyeri	Xipkro	72	16	M	2.18
CV	Externa	3	1	6	01.06.2019	2019	1455.5	XIPKRO-05CA03A1-11VI19	Xiphopenaeus kroyeri	Xipkro	73	19	M	2.64
CV	Externa	3	1	6	01.06.2019	2019	1455.5	XIPKRO-06CA03A1-11VI19	Xiphopenaeus kroyeri	Xipkro	80	16	F	2.81
CV	Externa	3	1	6	01.06.2019	2019	1455.5	XIPKRO-07CA03A1-11VI19	Xiphopenaeus kroyeri	Xipkro	82	18	F	3.29
CV	Externa	3	1	6	01.06.2019	2019	1455.5	XIPKRO-08CA03A1-11VI19	Xiphopenaeus kroyeri	Xipkro	61	13	F	1.36
CV	Externa	3	1	6	01.06.2019	2019	1455.5	XIPKRO-09CA03A1-11VI19	Xiphopenaeus kroyeri	Xipkro	62	12	F	1.6
CV	Externa	3	1	6	01.06.2019	2019	1455.5	XIPKRO-10CA03A1-11VI19	Xiphopenaeus kroyeri	Xipkro	66	12	M	1.43
CV	Externa	3	1	6	01.06.2019	2019	1455.5	XIPKRO-11CA03A1-11VI19	Xiphopenaeus kroyeri	Xipkro	97	22	F	5.49
CV	Externa	3	1	6	01.06.2019	2019	1455.5	XIPKRO-12CA03A1-11VI19	Xiphopenaeus kroyeri	Xipkro	97	25	F	6.86
CV	Externa	3	1	6	01.06.2019	2019	1455.5	XIPKRO-13CA03A1-11VI19	Xiphopenaeus kroyeri	Xipkro	74	16	M	2.27
CV	Externa	3	1	6	01.06.2019	2019	1455.5	XIPKRO-14CA03A1-11VI19	Xiphopenaeus kroyeri	Xipkro	55	13	F	1.1
CV	Externa	3	1	6	01.06.2019	2019	1455.5	XIPKRO-15CA03A1-11VI19	Xiphopenaeus kroyeri	Xipkro	62	14	F	1.55
CV	Externa	3	1	6	01.06.2019	2019	1455.5	XIPKRO-16CA03A1-11VI19	Xiphopenaeus kroyeri	Xipkro	62	13	F	1.49
CV	Externa	3	1	6	01.06.2019	2019	1455.5	XIPKRO-17CA03A1-11VI19	Xiphopenaeus kroyeri	Xipkro	60	14	F	1.26
CV	Externa	3	1	6	01.06.2019	2019	1455.5	XIPKRO-18CA03A1-11VI19	Xiphopenaeus kroyeri	Xipkro	56	12	F	0.94
CV	Externa	3	1	6	01.06.2019	2019	1455.5	XIPKRO-19CA03A1-11VI19	Xiphopenaeus kroyeri	Xipkro	48	10	F	0.58
CV	Externa	3	1	6	01.06.2019	2019	1455.5	XIPKRO-20CA03A1-11VI19	Xiphopenaeus kroyeri	Xipkro	47	12	F	0.61
CV	Externa	3	1	6	01.06.2019	2019	1455.5	XIPKRO-21CA03A1-11VI19	Xiphopenaeus kroyeri	Xipkro	60	14	F	1.14
CV	Externa	3	1	6	01.06.2019	2019	1455.5	XIPKRO-22CA03A1-11VI19	Xiphopenaeus kroyeri	Xipkro	60	16	M	1.7
CV	Externa	3	1	6	01.06.2019	2019	1455.5	XIPKRO-23CA03A1-11VI19	Xiphopenaeus kroyeri	Xipkro	46	10	F	0.6
CV	Externa	3	1	6	01.06.2019	2019	1455.5	XIPKRO-24CA03A1-11VI19	Xiphopenaeus kroyeri	Xipkro	42	11	F	0.57
CV	Externa	3	1	6	01.06.2019	2019	1455.5	XIPKRO-25CA03A1-11VI19	Xiphopenaeus kroyeri	Xipkro	44	9	F	0.62
CV	Externa	3	1	6	01.06.2019	2019	1455.5	XIPKRO-26CA03A1-11VI19	Xiphopenaeus kroyeri	Xipkro	50	10	F	0.7
CV	Externa	3	1	6	01.06.2019	2019	1455.5	XIPKRO-27CA03A1-11VI19	Xiphopenaeus kroyeri	Xipkro	46	9	F	0.65
CV	Externa	3	1	6	01.06.2019	2019	1455.5	XIPKRO-28CA03A1-11VI19	Xiphopenaeus kroyeri	Xipkro	41	7	F	0.43
CV	Externa	3	1	6	01.06.2019	2019	1455.5	XIPKRO-29CA03A1-11VI19	Xiphopenaeus kroyeri	Xipkro	48	10	F	0.63
CV	Externa	3	1	6	01.06.2019	2019	1455.5	XIPKRO-30CA03A1-11VI19	Xiphopenaeus kroyeri	Xipkro	39	9	F	0.3
CV	Externa	3	1	6	01.06.2019	2019	1455.5		Xiphopenaeus kroyeri	Xipkro				136.98
CV	Externa	3	2	6	01.06.2019	2019	574	XIPKRO-01CA03A2-11VI19	Xiphopenaeus kroyeri	Xipkro	62	17	F	2.28
CV	Externa	3	2	6	01.06.2019	2019	574	XIPKRO-02CA03A2-11VI19	Xiphopenaeus kroyeri	Xipkro	58	12	M	1.4
CV	Externa	3	2	6	01.06.2019	2019	574	XIPKRO-03CA03A2-11VI19	Xiphopenaeus kroyeri	Xipkro	93	20	F	6.33
CV	Externa	3	2	6	01.06.2019	2019	574	XIPKRO-04CA03A2-11VI19	Xiphopenaeus kroyeri	Xipkro	65	14	F	1.78
CV	Externa	3	2	6	01.06.2019	2019	574	XIPKRO-05CA03A2-11VI19	Xiphopenaeus kroyeri	Xipkro	59	10	F	1.48
CV	Externa	3	2	6	01.06.2019	2019	574	XIPKRO-06CA03A2-11VI19	Xiphopenaeus kroyeri	Xipkro	47	17	M	2.77
CV	Externa	3	2	6	01.06.2019	2019	574	XIPKRO-07CA03A2-11VI19	Xiphopenaeus kroyeri	Xipkro	65	13	M	1.81
CV	Externa	3	2	6	01.06.2019	2019	574	XIPKRO-08CA03A2-11VI19	Xiphopenaeus kroyeri	Xipkro	60	13	M	1.34
CV	Externa	3	2	6	01.06.2019	2019	574	XIPKRO-09CA03A2-11VI19	Xiphopenaeus kroyeri	Xipkro	69	15	F	2.29
CV	Externa	3	2	6	01.06.2019	2019	574	XIPKRO-10CA03A2-11VI19	Xiphopenaeus kroyeri	Xipkro	62	12	M	2.16
CV	Externa	3	2	6	01.06.2019	2019	574	XIPKRO-11CA03A2-11VI19	Xiphopenaeus kroyeri	Xipkro	58	10	F	1.29
CV	Externa	3	2	6	01.06.2019	2019	574	XIPKRO-12CA03A2-11VI19	Xiphopenaeus kroyeri	Xipkro	86	20	F	2.63
CV	Externa	3	2	6	01.06.2019	2019	574	XIPKRO-13CA03A2-11VI19	Xiphopenaeus kroyeri	Xipkro	57	11	F	1.2
CV	Externa	3	2	6	01.06.2019	2019	574	XIPKRO-14CA03A2-11VI19	Xiphopenaeus kroyeri	Xipkro	60	13	F	1.1
CV	Externa	3	2	6	01.06.2019	2019	574	XIPKRO-15CA03A2-11VI19	Xiphopenaeus kroyeri	Xipkro	70	16	M	2.44
CV	Externa	3	2	6	01.06.2019	2019	574	XIPKRO-16CA03A2-11VI19	Xiphopenaeus kroyeri	Xipkro	82	16	F	2.98
CV	Externa	3	2	6	01.06.2019	2019	574	XIPKRO-17CA03A2-11VI19	Xiphopenaeus kroyeri	Xipkro	70	15	F	1.73
CV	Externa	3	2	6	01.06.2019	2019	574	XIPKRO-18CA03A2-11VI19	Xiphopenaeus kroyeri	Xipkro	58	14	M	1.25
CV	Externa	3	2	6	01.06.2019	2019	574	XIPKRO-19CA03A2-11VI19	Xiphopenaeus kroyeri	Xipkro	84	20	F	3.62
CV	Externa	3	2	6	01.06.2019	2019	574	XIPKRO-20CA03A2-11VI19	Xiphopenaeus kroyeri	Xipkro	68	18	F	2.68
CV	Externa	3	2	6	01.06.2019	2019	574	XIPKRO-21CA03A2-11VI19	Xiphopenaeus kroyeri	Xipkro	74	17	M	2.33
CV	Externa	3	2	6	01.06.2019	2019	574	XIPKRO-22CA03A2-11VI19	Xiphopenaeus kroyeri	Xipkro	91	15	F	4.3
CV	Externa	3	2	6	01.06.2019	2019	574	XIPKRO-23CA03A2-11VI19	Xiphopenaeus kroyeri	Xipkro	63	20	M	1.08
CV	Externa	3	2	6	01.06.2019	2019	574	XIPKRO-24CA03A2-11VI19	Xiphopenaeus kroyeri	Xipkro	51	13	F	0.9
CV	Externa	3	2	6	01.06.2019	2019	574	XIPKRO-25CA03A2-11VI19	Xiphopenaeus kroyeri	Xipkro	65	10	M	1.98
CV	Externa	3	2	6	01.06.2019	2019	574	XIPKRO-26CA03A2-11VI19	Xiphopenaeus kroyeri	Xipkro	45	16	F	0.65
CV	Externa	3	2	6	01.06.2019	2019	574	XIPKRO-27CA03A2-11VI19	Xiphopenaeus kroyeri	Xipkro	90	12	F	4.69
CV	Externa	3	2	6	01.06.2019	2019	574	XIPKRO-28CA03A2-11VI19	Xiphopenaeus kroyeri	Xipkro	71	21	M	2.2
CV	Externa	3	2	6	01.06.2019	2019	574	XIPKRO-29CA03A2-11VI19	Xiphopenaeus kroyeri	Xipkro	75	13	F	3.45
CV	Externa	3	2	6	01.06.2019	2019	574	XIPKRO-30CA03A2-11VI19	Xiphopenaeus kroyeri	Xipkro	57	20	M	1.08
CV	Externa	3	2	6	01.06.2019	2019	574		Xiphopenaeus kroyeri	Xipkro				121.35
CV	Externa	3	3	6	01.06.2019	2019	1040.38	XIPKRO-01CA03A3-11VI19	Xiphopenaeus kroyeri	Xipkro	70	20	F	3.49
CV	Externa	3	3	6	01.06.2019	2019	1040.38	XIPKRO-02CA03A3-11VI19	Xiphopenaeus kroyeri	Xipkro	72	21	M	3.46
CV	Externa	3	3	6	01.06.2019	2019	1040.38	XIPKRO-03CA03A3-11VI19	Xiphopenaeus kroyeri	Xipkro	71	17	M	2.37
CV	Externa	3	3	6	01.06.2019	2019	1040.38	XIPKRO-04CA03A3-11VI19	Xiphopenaeus kroyeri	Xipkro	53	12	F	0.9
CV	Externa	3	3	6	01.06.2019	2019	1040.38	XIPKRO-05CA03A3-11VI19	Xiphopenaeus kroyeri	Xipkro	72	19	F	3.2
CV	Externa	3	3	6	01.06.2019	2019	1040.38	XIPKRO-06CA03A3-11VI19	Xiphopenaeus kroyeri	Xipkro	70	18	M	2.57
CV	Externa	3	3	6	01.06.2019	2019	1040.38	XIPKRO-07CA03A3-11VI19	Xiphopenaeus kroyeri	Xipkro	62	15	F	1.76
CV	Externa	3	3	6	01.06.2019	2019	1040.38	XIPKRO-08CA03A3-11VI19	Xiphopenaeus kroyeri	Xipkro	71	19	M	3.08
CV	Externa	3	3	6	01.06.2019	2019	1040.38	XIPKRO-09CA03A3-11VI19	Xiphopenaeus kroyeri	Xipkro	74	18	F	3.26
CV	Externa	3	3	6	01.06.2019	2019	1040.38	XIPKRO-10CA03A3-11VI19	Xiphopenaeus kroyeri	Xipkro	68	22	M	2.99
CV	Externa	3	3	6	01.06.2019	2019	1040.38	XIPKRO-11CA03A3-11VI19	Xiphopenaeus kroyeri	Xipkro	36	8	F	0.33
CV	Externa	3	3	6	01.06.2019	2019	1040.38	XIPKRO-12CA03A3-11VI19	Xiphopenaeus kroyeri	Xipkro	62	13	F	1.83
CV	Externa	3	3	6	01.06.2019	2019	1040.38	XIPKRO-13CA03A3-11VI19	Xiphopenaeus kroyeri	Xipkro	87	20	F	4.29
CV	Externa	3	3	6	01.06.2019	2019	1040.38	XIPKRO-14CA03A3-11VI19	Xiphopenaeus kroyeri	Xipkro	65	15	F	1.82
CV	Externa	3	3	6	01.06.2019	2019	1040.38	XIPKRO-15CA03A3-11VI19	Xiphopenaeus kroyeri	Xipkro	66	13	F	1.44
CV	Externa	3	3	6	01.06.2019	2019	1040.38	XIPKRO-16CA03A3-11VI19	Xiphopenaeus kroyeri	Xipkro	73	16	M	2.33
CV	Externa	3	3	6	01.06.2019	2019	1040.38	XIPKRO-17CA03A3-11VI19	Xiphopenaeus kroyeri	Xipkro	70	15	F	2.18
CV	Externa	3	3	6	01.06.2019	2019	1040.38	XIPKRO-18CA03A3-11VI19	Xiphopenaeus kroyeri	Xipkro	79	18	F	2.9
CV	Externa	3	3	6	01.06.2019	2019	1040.38	XIPKRO-19CA03A3-11VI19	Xiphopenaeus kroyeri	Xipkro	77	16	F	2.6
CV	Externa	3	3	6	01.06.2019	2019	1040.38	XIPKRO-20CA03A3-11VI19	Xiphopenaeus kroyeri	Xipkro	57	13	F	1.1
CV	Externa	3	3	6	01.06.2019	2019	1040.38	XIPKRO-21CA03A3-11VI19	Xiphopenaeus kroyeri	Xipkro	70	17	F	1.98
CV	Externa	3	3	6	01.06.2019	2019	1040.38	XIPKRO-22CA03A3-11VI19	Xiphopenaeus kroyeri	Xipkro	64	15	M	1.79
CV	Externa	3	3	6	01.06.2019	2019	1040.38	XIPKRO-23CA03A3-11VI19	Xiphopenaeus kroyeri	Xipkro	82	19	F	3.36
CV	Externa	3	3	6	01.06.2019	2019	1040.38	XIPKRO-24CA03A3-11VI19	Xiphopenaeus kroyeri	Xipkro	79	19	F	3.01
CV	Externa	3	3	6	01.06.2019	2019	1040.38	XIPKRO-25CA03A3-11VI19	Xiphopenaeus kroyeri	Xipkro	71	17	F	2.16
CV	Externa	3	3	6	01.06.2019	2019	1040.38	XIPKRO-26CA03A3-11VI19	Xiphopenaeus kroyeri	Xipkro	62	23	M	4.42
CV	Externa	3	3	6	01.06.2019	2019	1040.38	XIPKRO-27CA03A3-11VI19	Xiphopenaeus kroyeri	Xipkro	87	22	M	3.93
CV	Externa	3	3	6	01.06.2019	2019	1040.38	XIPKRO-28CA03A3-11VI19	Xiphopenaeus kroyeri	Xipkro	67	15	F	1.69
CV	Externa	3	3	6	01.06.2019	2019	1040.38	XIPKRO-29CA03A3-11VI19	Xiphopenaeus kroyeri	Xipkro	70	15	M	2.55
CV	Externa	3	3	6	01.06.2019	2019	1040.38	XIPKRO-30CA03A3-11VI19	Xiphopenaeus kroyeri	Xipkro	72	20	M	4.15
CV	Externa	3	3	6	01.06.2019	2019	1040.38		Xiphopenaeus kroyeri	Xipkro				23.46
CV	Externa	4	1	6	01.06.2019	2019	1291.5	XIPKRO-01CA04A1-11VI19	Xiphopenaeus kroyeri	Xipkro	78	15	F	2.22
CV	Externa	4	1	6	01.06.2019	2019	1291.5	XIPKRO-02CA04A1-11VI19	Xiphopenaeus kroyeri	Xipkro	92	23	F	5.13
CV	Externa	4	1	6	01.06.2019	2019	1291.5	XIPKRO-03CA04A1-11VI19	Xiphopenaeus kroyeri	Xipkro	73	14	F	1.97
CV	Externa	4	1	6	01.06.2019	2019	1291.5	XIPKRO-04CA04A1-11VI19	Xiphopenaeus kroyeri	Xipkro	62	13	F	3.18
CV	Externa	4	1	6	01.06.2019	2019	1291.5	XIPKRO-05CA04A1-11VI19	Xiphopenaeus kroyeri	Xipkro	78	14	M	2.1
CV	Externa	4	1	6	01.06.2019	2019	1291.5	XIPKRO-06CA04A1-11VI19	Xiphopenaeus kroyeri	Xipkro	100	23	F	5.2
CV	Externa	4	1	6	01.06.2019	2019	1291.5	XIPKRO-07CA04A1-11VI19	Xiphopenaeus kroyeri	Xipkro	73	11	F	2.1
CV	Externa	4	1	6	01.06.2019	2019	1291.5	XIPKRO-08CA04A1-11VI19	Xiphopenaeus kroyeri	Xipkro	31	7	F	0.4
CV	Externa	4	1	6	01.06.2019	2019	1291.5	XIPKRO-09CA04A1-11VI19	Xiphopenaeus kroyeri	Xipkro	60	14	F	1.5
CV	Externa	4	2	6	01.06.2019	2019	1527.25	XIPKRO-01CA04A2-11VI19	Xiphopenaeus kroyeri	Xipkro	66	10	M	1.16
CV	Externa	4	2	6	01.06.2019	2019	1527.25	XIPKRO-02CA04A2-11VI19	Xiphopenaeus kroyeri	Xipkro	59	9	F	0.95
CV	Externa	4	2	6	01.06.2019	2019	1527.25	XIPKRO-03CA04A2-11VI19	Xiphopenaeus kroyeri	Xipkro	112	25	F	7.79
CV	Externa	4	2	6	01.06.2019	2019	1527.25	XIPKRO-04CA04A2-11VI19	Xiphopenaeus kroyeri	Xipkro	79	16	F	2.93
CV	Externa	4	2	6	01.06.2019	2019	1527.25	XIPKRO-05CA04A2-11VI19	Xiphopenaeus kroyeri	Xipkro	62	12	F	2.22
CV	Externa	4	2	6	01.06.2019	2019	1527.25	XIPKRO-06CA04A2-11VI19	Xiphopenaeus kroyeri	Xipkro	81	16	F	2.35
CV	Externa	4	2	6	01.06.2019	2019	1527.25	XIPKRO-07CA04A2-11VI19	Xiphopenaeus kroyeri	Xipkro	78	16	F	2.21
CV	Externa	4	2	6	01.06.2019	2019	1527.25	XIPKRO-08CA04A2-11VI19	Xiphopenaeus kroyeri	Xipkro	52	10	F	0.98
CV	Externa	4	2	6	01.06.2019	2019	1527.25	XIPKRO-09CA04A2-11VI19	Xiphopenaeus kroyeri	Xipkro	57	11	M	1.71
CV	Externa	4	2	6	01.06.2019	2019	1527.25	XIPKRO-10CA04A2-11VI19	Xiphopenaeus kroyeri	Xipkro	62	14	M	2.12
CV	Externa	4	3	6	01.06.2019	2019	1742.5	XIPKRO-01CA04A3-11VI19	Xiphopenaeus kroyeri	Xipkro	60	19	F	1.56
CV	Externa	4	3	6	01.06.2019	2019	1742.5	XIPKRO-02CA04A3-11VI19	Xiphopenaeus kroyeri	Xipkro	46	20	F	0.62
CV	Externa	4	3	6	01.06.2019	2019	1742.5	XIPKRO-03CA04A3-11VI19	Xiphopenaeus kroyeri	Xipkro	68	26	F	2.5
CV	Externa	4	3	6	01.06.2019	2019	1742.5	XIPKRO-04CA04A3-11VI19	Xiphopenaeus kroyeri	Xipkro	69	22	M	2.59
CV	Externa	4	3	6	01.06.2019	2019	1742.5	XIPKRO-05CA04A3-11VI19	Xiphopenaeus kroyeri	Xipkro	46	20	F	0.99
CV	Externa	5	1	6	01.06.2019	2019	937.875	XIPKRO-01CA05A1-11VI19	Xiphopenaeus kroyeri	Xipkro	81	37	M	2.98
CV	Externa	5	1	6	01.06.2019	2019	937.875	XIPKRO-02CA05A1-11VI19	Xiphopenaeus kroyeri	Xipkro	64	29	M	1.72
CV	Externa	5	1	6	01.06.2019	2019	937.875	XIPKRO-03CA05A1-11VI19	Xiphopenaeus kroyeri	Xipkro	94	33	F	4.85
CV	Externa	5	1	6	01.06.2019	2019	937.875	XIPKRO-04CA05A1-11VI19	Xiphopenaeus kroyeri	Xipkro	66	24	F	1.85
CV	Externa	5	1	6	01.06.2019	2019	937.875	XIPKRO-05CA05A1-11VI19	Xiphopenaeus kroyeri	Xipkro	71	27	M	2.32
CV	Externa	5	2	6	01.06.2019	2019	1117.25	XIPKRO-01CA05A2-11VI19	Xiphopenaeus kroyeri	Xipkro	71	20	F	3.6
CV	Externa	5	2	6	01.06.2019	2019	1117.25	XIPKRO-02CA05A2-11VI19	Xiphopenaeus kroyeri	Xipkro	74	26	F	2.78
CV	Externa	5	2	6	01.06.2019	2019	1117.25	XIPKRO-03CA05A2-11VI19	Xiphopenaeus kroyeri	Xipkro	85	34	M	5.12
CV	Externa	5	2	6	01.06.2019	2019	1117.25	XIPKRO-04CA05A2-11VI19	Xiphopenaeus kroyeri	Xipkro	67	26	M	2.75
CV	Externa	5	2	6	01.06.2019	2019	1117.25	XIPKRO-05CA05A2-11VI19	Xiphopenaeus kroyeri	Xipkro	94	35	F	6.77
CV	Externa	5	2	6	01.06.2019	2019	1117.25	XIPKRO-06CA05A2-11VI19	Xiphopenaeus kroyeri	Xipkro	56	21	F	1.07
CV	Externa	5	2	6	01.06.2019	2019	1117.25	XIPKRO-07CA05A2-11VI19	Xiphopenaeus kroyeri	Xipkro	54	21	F	1.18
CV	Externa	5	2	6	01.06.2019	2019	1117.25	XIPKRO-08CA05A2-11VI19	Xiphopenaeus kroyeri	Xipkro	68	24	M	2.12
CV	Externa	5	2	6	01.06.2019	2019	1117.25	XIPKRO-09CA05A2-11VI19	Xiphopenaeus kroyeri	Xipkro	67	25	M	2.46
CV	Externa	5	2	6	01.06.2019	2019	1117.25	XIPKRO-10CA05A2-11VI19	Xiphopenaeus kroyeri	Xipkro	86	37	F	4.71
CV	Externa	5	2	6	01.06.2019	2019	1117.25	XIPKRO-11CA05A2-11VI19	Xiphopenaeus kroyeri	Xipkro	65	24	M	1.97
CV	Externa	5	2	6	01.06.2019	2019	1117.25	XIPKRO-12CA05A2-11VI19	Xiphopenaeus kroyeri	Xipkro	67	23	M	1.15
CV	Externa	5	2	6	01.06.2019	2019	1117.25	XIPKRO-13CA05A2-11VI19	Xiphopenaeus kroyeri	Xipkro	63	21	F	1.65
CV	Externa	5	2	6	01.06.2019	2019	1117.25	XIPKRO-14CA05A2-11VI19	Xiphopenaeus kroyeri	Xipkro	63	20	F	1.82
CV	Externa	5	2	6	01.06.2019	2019	1117.25	XIPKRO-15CA05A2-11VI19	Xiphopenaeus kroyeri	Xipkro	64	25	F	2.08
CV	Externa	5	2	6	01.06.2019	2019	1117.25	XIPKRO-16CA05A2-11VI19	Xiphopenaeus kroyeri	Xipkro	83	41	M	4.43
CV	Externa	5	2	6	01.06.2019	2019	1117.25	XIPKRO-17CA05A2-11VI19	Xiphopenaeus kroyeri	Xipkro	86	35	M	4.53
CV	Externa	5	2	6	01.06.2019	2019	1117.25	XIPKRO-18CA05A2-11VI19	Xiphopenaeus kroyeri	Xipkro	80	31	M	3.14
CV	Externa	5	2	6	01.06.2019	2019	1117.25	XIPKRO-19CA05A2-11VI19	Xiphopenaeus kroyeri	Xipkro	71	28	M	3.31
CV	Externa	5	2	6	01.06.2019	2019	1117.25	XIPKRO-20CA05A2-11VI19	Xiphopenaeus kroyeri	Xipkro	78	32	M	2.77
CV	Externa	5	2	6	01.06.2019	2019	1117.25	XIPKRO-21CA05A2-11VI19	Xiphopenaeus kroyeri	Xipkro	73	28	M	2.5
CV	Externa	5	2	6	01.06.2019	2019	1117.25	XIPKRO-22CA05A2-11VI19	Xiphopenaeus kroyeri	Xipkro	71	29	M	2.25
CV	Externa	5	2	6	01.06.2019	2019	1117.25	XIPKRO-23CA05A2-11VI19	Xiphopenaeus kroyeri	Xipkro	67	22	M	1.87
CV	Externa	5	2	6	01.06.2019	2019	1117.25	XIPKRO-24CA05A2-11VI19	Xiphopenaeus kroyeri	Xipkro	76	31	M	3.15
CV	Externa	5	2	6	01.06.2019	2019	1117.25	XIPKRO-25CA05A2-11VI19	Xiphopenaeus kroyeri	Xipkro	86	34	M	3.88
CV	Externa	5	2	6	01.06.2019	2019	1117.25	XIPKRO-26CA05A2-11VI19	Xiphopenaeus kroyeri	Xipkro	74	31	F	2.12
CV	Externa	5	2	6	01.06.2019	2019	1117.25	XIPKRO-27CA05A2-11VI19	Xiphopenaeus kroyeri	Xipkro	71	32	M	2.62
CV	Externa	5	2	6	01.06.2019	2019	1117.25	XIPKRO-28CA05A2-11VI19	Xiphopenaeus kroyeri	Xipkro	81	31	M	3.32
CV	Externa	5	2	6	01.06.2019	2019	1117.25	XIPKRO-29CA05A2-11VI19	Xiphopenaeus kroyeri	Xipkro	38	15	M	3.32
CV	Externa	5	2	6	01.06.2019	2019	1117.25	XIPKRO-30CA05A2-11VI19	Xiphopenaeus kroyeri	Xipkro	38	15	F	0.37
CV	Externa	5	2	6	01.06.2019	2019	1117.25	XIPKRO-31CA05A2-11VI19	Xiphopenaeus kroyeri	Xipkro	37	12	F	0.29
CV	Externa	5	2	6	01.06.2019	2019	1117.25	XIPKRO-32CA05A2-11VI19	Xiphopenaeus kroyeri	Xipkro	83	34	M	4.47
CV	Externa	5	2	6	01.06.2019	2019	1117.25	XIPKRO-33CA05A2-11VI19	Xiphopenaeus kroyeri	Xipkro	75	28	M	4.08
CV	Externa	5	2	6	01.06.2019	2019	1117.25	XIPKRO-34CA05A2-11VI19	Xiphopenaeus kroyeri	Xipkro	64	25	F	1.7
CV	Externa	5	2	6	01.06.2019	2019	1117.25	XIPKRO-35CA05A2-11VI19	Xiphopenaeus kroyeri	Xipkro	66	26	F	2.54
CV	Externa	5	2	6	01.06.2019	2019	1117.25	XIPKRO-36CA05A2-11VI19	Xiphopenaeus kroyeri	Xipkro	55	21	M	1.49
CV	Externa	5	2	6	01.06.2019	2019	1117.25	XIPKRO-37CA05A2-11VI19	Xiphopenaeus kroyeri	Xipkro	70	31	F	1.8
CV	Externa	5	2	6	01.06.2019	2019	1117.25	XIPKRO-38CA05A2-11VI19	Xiphopenaeus kroyeri	Xipkro	64	21	M	1.51
CV	Externa	5	2	6	01.06.2019	2019	1117.25	XIPKRO-39CA05A2-11VI19	Xiphopenaeus kroyeri	Xipkro	65	28	F	1.89
CV	Externa	5	2	6	01.06.2019	2019	1117.25	XIPKRO-40CA05A2-11VI19	Xiphopenaeus kroyeri	Xipkro	49	17	F	0.84
CV	Externa	5	2	6	01.06.2019	2019	1117.25	XIPKRO-41CA05A2-11VI19	Xiphopenaeus kroyeri	Xipkro	78	29	M	2.01
[truncated: 3,833 more rows]

## Sheet: Metadata
Column	Description
Column A1	Regions or the rivers where sampling were carried out
Column B1	Area in which each sample was collected related to the part of the river: 'internal' means in estuarine areas, and 'external' refers to coastal adjacent areas of each river
Column C1	Each sampling site along of each region the samples were collected
Column D1	Sampling replicates (a total of three samples/trawlings) at each sampling site per month
Column E1	Month each sampling was carried out
Column F1	Date (day/month/year) each sampling was carried out
Column G1	Year each sampling was carried out
Column H1	Squared area covered (m2) of each trawl performed in each sampling site
Column I1	Code given to each sample (individual)
Column J1	Scientific name of the species
Column K1	Code of the species used for analysis
Column L1	Total length of each individual analysed measured in millimetrs unit (mm)
Column M1	Carapace length of each individual measured in millimetes unit (mm)
Column N1	Sex of each individual sampled and analysed male or female
Column O1	Total weight of each individual sampled weighted in grams (g)
